# Supplementary material
Source: Royal Society of Chemistry journal article supplement (doi:10.1039/d6md00285d)
Supplement: d6md00285d1.pdf [file d6md00285d1.pdf]

## SUPPLEMENTARY INFORMATION

### 3-Hydroxypyrimidine-2,4-dione derivatives as monkeypox virus resolvase (Mpr) inhibitors

*Muhammad Syafiq Bin Shahari<sup>a</sup>, Jacob P. Mahoney<sup>a</sup>, Ziyue Wang<sup>b</sup>, Anil Pant<sup>b</sup>, Ajit Jagtap<sup>a</sup>,  
Roshan Katekar<sup>a</sup>, Jiashu Xie<sup>a</sup>, Zhilong Yang<sup>b</sup> and Zhengqiang Wang<sup>a\*</sup>*

<sup>a</sup> Center for Drug Design, College of Pharmacy, University of Minnesota, Minneapolis, Minnesota  
55455, United States

<sup>b</sup> Department of Veterinary Pathobiology, College of Veterinary Medicine & Biomedical Sciences,  
Texas A&M University, College Station, Texas 77843, United States

**Corresponding Author:** Zhengqiang Wang

Email : [wangx472@umn.edu](mailto:wangx472@umn.edu) ; Phone : +1 (612) 626-7025

---

| <b>Table of Contents</b>                                                          | <b>Page No.</b> |
|-----------------------------------------------------------------------------------|-----------------|
| Spectroscopic data of intermediates <b>6-9</b> , <b>10a-w</b> and <b>11a-n</b>    | S3-S22          |
| <sup>1</sup> H-NMR, <sup>13</sup> C-NMR, HRMS and HPLC spectra of final compounds | S23-S96         |
| Measurement of 6-FAM fluorophore quenching by compounds                           | S97             |
| Detection of compound aggregation via centrifugation                              | S98             |
| Mpr dose-response curves of compounds <b>2a-w</b>                                 | S99-S101        |

---

## General Procedure

All commercial chemicals were used as supplied unless otherwise indicated. Dry solvents (THF, Et<sub>2</sub>O, CH<sub>2</sub>Cl<sub>2</sub> and DMF) were dispensed under argon from an anhydrous solvent system with two packed columns of neutral alumina or molecular sieves. Anhydrous ethanol was purchased from Sigma-Aldrich. Flash chromatography was performed on a Teledyne Combiflash RF-200 with RediSep columns (silica) with indicated mobile phase. All moisture sensitive reactions were performed under an inert atmosphere of ultra-pure argon with oven-dried glassware. A Bruker 400 MHz NMR was used to obtain the NMR spectra for compound characterization with MNova software. HRMS data were acquired using an Agilent 6230 TOF LC/MS spectrometer equipped with ESI and APCI ion modules. Glass backed plates for thin-layer chromatography (TLC) analysis were used (silica gel, Sigma, St. Louis, MO) with fluorescent indicator (254 nm). Compounds on the TLC plates were visualized with a UV lamp (254 nm). Compound purity analysis was performed using Agilent 1260 Infinity HPLC with an Eclipse C18 column (3.5 μm, 4.6 × 100 mm). HPLC conditions: flow rate, 1.0 mL/min; solvent A, 0.1% formic acid in water; solvent B, 0.1% formic acid in acetonitrile; gradient (B, %): 0–6 min (5–100), 6–8 min (100), 8–9 min (100–5). Purity was determined by total absorbance at 254 nm. The representative compounds were selected from this series for purity screening, and it has shown a purity of more than 95%.

### 1-(Benzyloxy)urea (6)

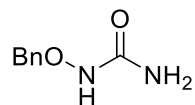

To a solution of N-hydroxyurea (65.7 mmol, 1 eq) in methanol (90 mL) were added potassium hydroxide (78.9 mmol, 1.2 eq) and benzyl chloride (65.7 mmol, 1 eq). The reaction mixture was refluxed for 6 h. The solvent was removed under reduced pressure and the solid formed was washed with water and adjusted their pH to neutral. The solid was filtered and undergo recrystallization with acetone and methylene chloride to afford a desired pure compound **6** as a white needle in 98% yield. <sup>1</sup>H-NMR (400 MHz, DMSO-*d*<sub>6</sub>) δ 9.03 (s, 1H), 7.47–7.27 (m, 5H), 6.35 (s, 2H), 4.73 (s, 2H); HRMS (APCI-) calcd. for C<sub>8</sub>H<sub>10</sub>N<sub>2</sub>O<sub>2</sub> [M-H]<sup>-</sup> 165.0664, found 165.0678 (E = 8.5 ppm).

### 3-(Benzyloxy)-6-hydroxypyrimidine-2,4(1H,3H)-dione (7)

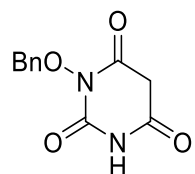

To a 200 mL round bottom flask were added freshly prepared sodium ethoxide (6.0 mmol, 1 eq) in anhydrous ethanol, 1-(benzyloxy)urea **6** (6.0 mmol, 1 eq) and diethyl malonate (6.0 mmol, 1 eq). The reaction mixture was stirred at 150 °C for 36 h under reflux conditions. The solvent was removed under reduced pressure. The residue was dissolved in water, then filtered to remove any precipitate. The water residue was acidified to pH 4–5 with 1N aqueous HCl to crush out the compound **7** as a light yellow solid in 95% yield. <sup>1</sup>H-NMR (400 MHz, DMSO-*d*<sub>6</sub>) δ 9.01 (s, 1H),

7.47–7.29 (m, 5H), 6.33 (s, 2H), 4.72 (s, 2H); HRMS (ESI-) calcd. for C<sub>11</sub>H<sub>10</sub>N<sub>2</sub>O<sub>4</sub> [M-H]<sup>-</sup> 233.0562, found 233.0577 (E = 6.4 ppm).

### 3-(Benzyloxy)-6-chloropyrimidine-2,4(1H,3H)-dione (8)

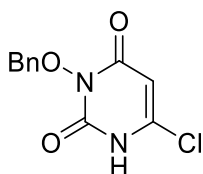

To a solution of 3-(benzyloxy)-6-hydroxypyrimidine-2,4(1H,3H)-dione **7** (8.5 mmol, 1.0 eq) in 40 mL of phosphorus oxychloride (POCl<sub>3</sub>) was added benzyl triethylammonium chloride (BnEt<sub>3</sub>NCl) (17.07 mmol, 1.0 eq), and the reaction mixture was stirred at 50 °C for 36 h under reflux condition for 6 h. The reaction mixture was set to cool down to room temperature and then pour gradually onto ice. The precipitate was filtered to give compound 3-(benzyloxy)-6-chloropyrimidine-2,4(1H,3H)-dione **8** as a light yellow solid in 55% yield. <sup>1</sup>H-NMR (400 MHz, DMSO-*d*<sub>6</sub>) δ 9.01 (s, 1H), 7.47–7.29 (m, 5H), 6.33 (s, 2H), 4.72 (s, 2H); HRMS (APCI-) calcd. for C<sub>11</sub>H<sub>9</sub>ClN<sub>2</sub>O<sub>3</sub> [M-H]<sup>-</sup> 251.0223, found 251.0251 (E = 11.2 ppm).

### 3-(Benzyloxy)-6-chloro-1-methylpyrimidine-2,4(1H,3H)-dione (9)

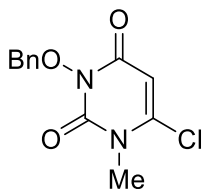

To a microwave reaction vessel were added 3-(benzyloxy)-6-chloropyrimidine-2,4(1H,3H)-dione **8** (2.0 mmol, 1.0 eq) in DMF (5 mL), followed by CS<sub>2</sub>CO<sub>3</sub> (4.0 mmol, 2.0 eq) and iodomethane (4.0 mmol, 2.0 eq). The mixture was stirred at 80 °C for 3 h and the reaction was monitored by

both TLC and MS-TOF. The reaction mixture was removed in vacuum and quenched with excess of H<sub>2</sub>O. The precipitation was filtered to provide desired compounds **9** as solid in 96%. <sup>1</sup>H-NMR (400 MHz, DMSO-*d*<sub>6</sub>) δ 7.60–7.48 (m, 2H), 7.47–7.35 (m, 3H), 6.19 (s, 1H), 5.02 (s, 2H), 3.47 (s, 3H); HRMS (APCI+) calcd. for C<sub>12</sub>H<sub>11</sub>ClN<sub>2</sub>O<sub>3</sub> [M+H]<sup>+</sup> 267.0536, found 267.0516 (E = 7.5 ppm).

### General Procedure for 6-amination.

To a microwave reaction vessel were added 3-(benzyloxy)-6-chloropyrimidine-2,4(1H,3H)-dione **8** (1.2 mmol, 1.0 eq), amines (1.8 mmol, 1.5 eq) and *N,N*-dimethylaniline (3.6 mmol, 3.0 eq). The reaction vessel was either irradiated using microwave or heating block at 170 °C for appropriate time. The reaction was monitored by both TLC and MS-TOF. The reaction mixture was quenched with MeOH, and the precipitate was filtered to provide desired compounds **10** as solid in 27–74%.

### 3-(Benzyloxy)-6-(phenylamino)pyrimidine-2,4(1H,3H)-dione (**10a**)

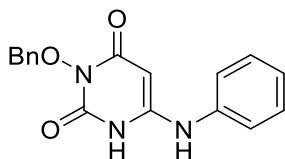

This compound was prepared following the procedure described for the preparation of **10**. Yield: 32%, white solid; <sup>1</sup>H-NMR (400 MHz, DMSO-*d*<sub>6</sub>) δ 10.87 (s, 1H), 8.41 (s, 1H), 7.63–7.54 (m, 2H), 7.46 (dddd, *J* = 6.9, 5.8, 4.3, 1.7 Hz, 5H), 7.34–7.20 (m, 3H), 5.05 (s, 2H), 4.85 (s, 1H); HRMS (APCI-) calcd. for C<sub>17</sub>H<sub>15</sub>N<sub>3</sub>O<sub>3</sub> [M-H]<sup>-</sup> 308.1035, found 308.1048 (E = 4.2 ppm).

### 3-(Benzyloxy)-6-((4-fluorophenyl)amino)pyrimidine-2,4(1H,3H)-dione (**10b**)

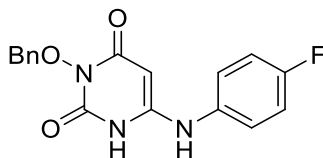

This compound was prepared following the procedure described for the preparation of **10**. Yield: 46%, white solid;  $^1\text{H-NMR}$  (400 MHz,  $\text{DMSO-}d_6$ )  $\delta$  10.90 (s, 1H), 8.32 (s, 1H), 7.52 (dq,  $J = 6.3, 2.8, 2.4$  Hz, 2H), 7.46–7.36 (m, 3H), 7.31–7.20 (m, 4H), 4.98 (s, 2H), 4.65 (s, 1H); HRMS (APCI+) calcd. for  $\text{C}_{17}\text{H}_{14}\text{FN}_3\text{O}_3$   $[\text{M}+\text{H}]^+$  328.1097, found 328.1088 ( $E = 2.7$  ppm).

### 3-(Benzyloxy)-6-((4-chlorophenyl)amino)pyrimidine-2,4(1H,3H)-dione (**10c**)

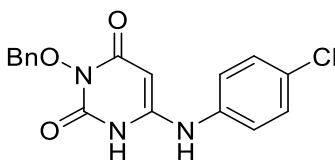

This compound was prepared following the procedure described for the preparation of **10**. Yield: 39%, white solid;  $^1\text{H-NMR}$  (400 MHz,  $\text{DMSO-}d_6$ )  $\delta$  10.93 (s, 1H), 8.66–8.33 (m, 1H), 7.56–7.50 (m, 2H), 7.46–7.37 (m, 5H), 7.28–7.22 (m, 2H), 4.99 (s, 2H), 4.83 (s, 1H); HRMS (ESI+) calcd. for  $\text{C}_{17}\text{H}_{14}\text{ClN}_3\text{O}_3$   $[\text{M}+\text{H}]^+$  344.0802, found 344.0799 ( $E = 0.9$  ppm).

### 4-((1-(Benzyloxy)-2,6-dioxo-1,2,3,6-tetrahydropyrimidin-4-yl)amino)benzonitrile (**10d**)

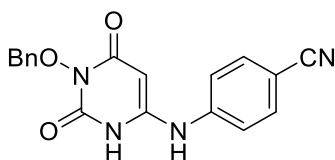

This compound was prepared following the procedure described for the preparation of **10**. Yield: 27%, brownish solid;  $^1\text{H-NMR}$  (400 MHz,  $\text{DMSO-}d_6$ )  $\delta$  11.14 (s, 1H), 9.09 (s, 1H), 7.84–7.75 (m,

2H), 7.54 (dq,  $J = 6.0, 2.8, 2.4$  Hz, 2H), 7.46–7.38 (m, 3H), 7.37–7.30 (m, 2H), 5.15 (s, 1H), 5.01 (s, 2H); HRMS (ESI+) calcd. for  $C_{18}H_{14}N_4O_3$   $[M+H]^+$  335.1144, found 335.1122 ( $E = 6.6$  ppm).

**3-(Benzyloxy)-6-((4-(trifluoromethyl)phenyl)amino)pyrimidine-2,4(1H,3H)-dione (10e)**

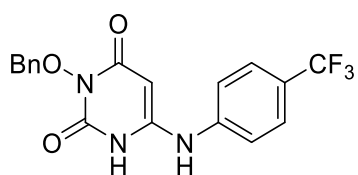

This compound was prepared following the procedure described for the preparation of **10**. Yield: 41%, light yellowish solid;  $^1H$ -NMR (400 MHz,  $DMSO-d_6$ )  $\delta$  11.05 (s, 1H), 8.91 (s, 1H), 7.71 (d,  $J = 8.4$  Hz, 2H), 7.58–7.49 (m, 2H), 7.46–7.36 (m, 5H), 5.07 (s, 1H), 5.01 (s, 2H); HRMS (ESI+) calcd. for  $C_{18}H_{14}F_3N_3O_3$   $[M+H]^+$  378.1066, found 378.1057 ( $E = 2.4$  ppm).

**3-(Benzyloxy)-6-((4-(trifluoromethoxy)phenyl)amino)pyrimidine-2,4(1H,3H)-dione (10f)**

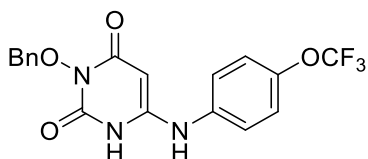

This compound was prepared following the procedure described for the preparation of **10**. Yield: 54%, white solid;  $^1H$ -NMR (400 MHz,  $DMSO-d_6$ )  $\delta$  11.01 (s, 1H), 8.67 (s, 1H), 7.58–7.49 (m, 2H), 7.40 (ddd,  $J = 8.5, 5.5, 1.3$  Hz, 5H), 7.36–7.31 (m, 2H), 5.00 (s, 2H), 4.85 (s, 1H); HRMS (ESI+) calcd. for  $C_{18}H_{14}F_3N_3O_4$   $[M+H]^+$  394.1015, found 394.0995 ( $E = 5.1$  ppm).

**3-(Benzyloxy)-6-((3-fluorophenyl)amino)pyrimidine-2,4(1H,3H)-dione (10g)**

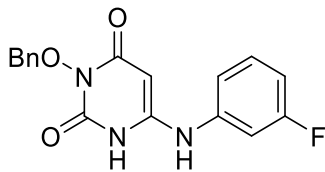

This compound was prepared following the procedure described for the preparation of **10**. Yield: 58%, white solid;  $^1\text{H-NMR}$  (400 MHz,  $\text{DMSO-}d_6$ )  $\delta$  10.97 (s, 1H), 8.59 (s, 1H), 7.59–7.48 (m, 2H), 7.48–7.34 (m, 4H), 7.14–7.04 (m, 2H), 6.99 (ddt,  $J = 9.5, 8.6, 1.7$  Hz, 1H), 5.00 (s, 2H), 4.93 (s, 1H); HRMS (ESI-) calcd. for  $\text{C}_{17}\text{H}_{15}\text{N}_3\text{O}_3$   $[\text{M-H}]^-$  326.0941, found 326.0952 ( $E = 3.4$  ppm).

### 3-(Benzyloxy)-6-((3-chlorophenyl)amino)pyrimidine-2,4(1H,3H)-dione (10h)

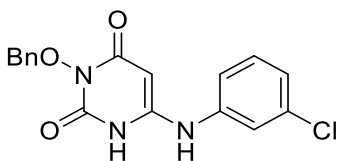

This compound was prepared following the procedure described for the preparation of **10**. Yield: 56%, light green solid;  $^1\text{H-NMR}$  (400 MHz,  $\text{DMSO-}d_6$ )  $\delta$  11.08 (s, 1H), 8.67 (s, 1H), 7.65–7.53 (m, 2H), 7.50–7.43 (m, 4H), 7.34 (t,  $J = 2.1$  Hz, 1H), 7.26 (ddt,  $J = 8.6, 6.7, 1.1$  Hz, 2H), 5.05 (s, 2H), 4.94 (s, 1H); HRMS (APCI-) calcd. for  $\text{C}_{17}\text{H}_{14}\text{ClN}_3\text{O}_3$   $[\text{M-H}]^-$  342.0645, found 342.0660 ( $E = 4.4$  ppm).

### 3-(Benzyloxy)-6-((3-bromophenyl)amino)pyrimidine-2,4(1H,3H)-dione (10i)

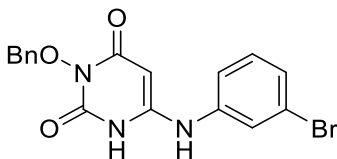

This compound was prepared following the procedure described for the preparation of **10**. Yield: 37%, white solid;  $^1\text{H-NMR}$  (400 MHz,  $\text{DMSO-}d_6$ )  $\delta$  11.03 (s, 1H), 8.58 (s, 1H), 7.61–7.47 (m,

2H), 7.45–7.38 (m, 4H), 7.37–7.33 (m, 2H), 7.24 (m, 1H), 5.00 (s, 2H), 4.88 (s, 1H); HRMS (ESI+) calcd. for  $C_{17}H_{14}BrN_3O_3$   $[M+H]^+$  388.0297, found 388.0276 (E = 5.4 ppm).

**3-(Benzyloxy)-6-((2-fluorophenyl)amino)pyrimidine-2,4(1H,3H)-dione (10j)**

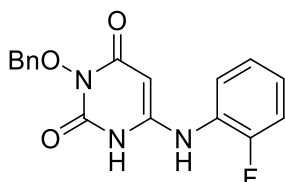

This compound was prepared following the procedure described for the preparation of **10**. Yield: 52%, white solid;  $^1H$ -NMR (400 MHz,  $DMSO-d_6$ )  $\delta$  10.94 (s, 1H), 8.26 (s, 1H), 7.58–7.49 (m, 2H), 7.46–7.19 (m, 7H), 4.99 (s, 2H), 4.57 (s, 1H); HRMS (ESI+) calcd. for  $C_{17}H_{14}FN_3O_3$   $[M+H]^+$  328.1097, found 328.1088 (E = 2.7 ppm).

**3-(Benzyloxy)-6-((2,4-difluorophenyl)amino)pyrimidine-2,4(1H,3H)-dione (10k)**

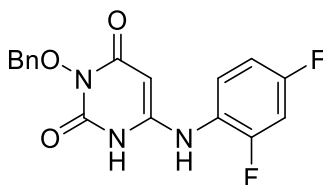

This compound was prepared following the procedure described for the preparation of **9**. Yield: 58%, white solid;  $^1H$ -NMR (400 MHz,  $DMSO-d_6$ )  $\delta$  11.02 (d,  $J$  = 2.6 Hz, 1H), 8.22 (s, 1H), 7.52 (m, 2H), 7.48–7.37 (m, 5H), 7.15 (tdd,  $J$  = 8.6, 2.9, 1.4 Hz, 1H), 4.98 (s, 2H), 4.46 (d,  $J$  = 1.5 Hz, 1H); HRMS (ESI-) calcd. for  $C_{17}H_{13}F_2N_3O_3$   $[M-H]^-$  344.0847, found 344.0853 (E = 1.7 ppm).

**3-(Benzyloxy)-6-((3,4-difluorophenyl)amino)pyrimidine-2,4(1H,3H)-dione (10l)**

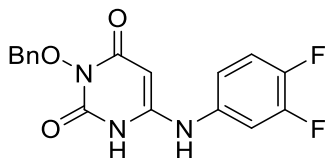

This compound was prepared following the procedure described for the preparation of **10**. Yield: 43%, white solid;  $^1\text{H-NMR}$  (400 MHz,  $\text{DMSO-}d_6$ )  $\delta$  11.00 (s, 1H), 8.50 (s, 1H), 7.57–7.50 (m, 2H), 7.49–7.31 (m, 5H), 7.12–7.04 (m, 1H), 4.99 (s, 2H), 4.81 (s, 1H); HRMS (ESI+) calcd. for  $\text{C}_{17}\text{H}_{13}\text{F}_2\text{N}_3\text{O}_3$   $[\text{M}+\text{H}]^+$  346.1003, found 346.0983 (E = 5.8 ppm).

### 3-(Benzyloxy)-6-(p-tolylamino)pyrimidine-2,4(1H,3H)-dione (**10m**)

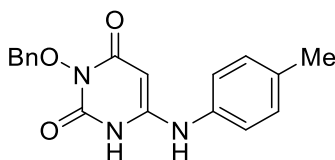

This compound was prepared following the procedure described for the preparation of **9**. Yield: 47%, white solid;  $^1\text{H-NMR}$  (400 MHz,  $\text{DMSO-}d_6$ )  $\delta$  10.60 (s, 1H), 8.31 (s, 1H), 7.58–7.48 (m, 2H), 7.46–7.35 (m, 3H), 7.21 (d,  $J = 7.9$  Hz, 2H), 7.12 (d,  $J = 8.0$  Hz, 2H), 4.98 (s, 2H), 4.70 (s, 1H); HRMS (ESI+) calcd. for  $\text{C}_{18}\text{H}_{17}\text{N}_3\text{O}_3$   $[\text{M}+\text{H}]^+$  324.1348, found 324.1329 (E = 5.9 ppm).

### 3-(Benzyloxy)-6-((4-(tert-butyl)phenyl)amino)pyrimidine-2,4(1H,3H)-dione (**10n**)

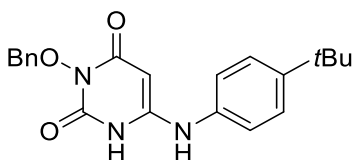

This compound was prepared following the procedure described for the preparation of **10**. Yield: 44%, white solid;  $^1\text{H-NMR}$  (400 MHz,  $\text{DMSO-}d_6$ )  $\delta$  10.75 (s, 1H), 8.24 (s, 1H), 7.57–7.50 (m,

2H), 7.46–7.37 (m, 5H), 7.20–7.11 (m, 2H), 4.98 (s, 2H), 4.73 (d,  $J = 2.3$  Hz, 1H), 1.29 (s, 9H); HRMS (ESI-) calcd. for  $C_{21}H_{23}N_3O_3$   $[M-H]^-$  364.1661, found 364.1678 ( $E = 4.7$  ppm).

### 3-(Benzyloxy)-6-((4-methoxyphenyl)amino)pyrimidine-2,4(1H,3H)-dione (10o)

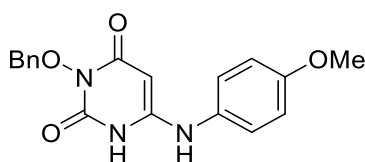

This compound was prepared following the procedure described for the preparation of **10**. Yield: 54%, light brownish solid;  $^1H$ -NMR (400 MHz,  $DMSO-d_6$ )  $\delta$  10.77 (s, 1H), 8.07 (s, 1H), 7.52 (dq,  $J = 6.1, 2.8, 2.4$  Hz, 2H), 7.47–7.36 (m, 3H), 7.22–7.12 (m, 2H), 7.02–6.90 (m, 2H), 4.97 (s, 2H), 4.52 (s, 1H), 3.77 (s, 3H); HRMS (APCI-) calcd. for  $C_{18}H_{17}N_3O_4$   $[M-H]^-$  338.1141, found 338.1163 ( $E = 6.5$  ppm).

### 3-(Benzyloxy)-6-(*m*-tolylamino)pyrimidine-2,4(1H,3H)-dione (10p)

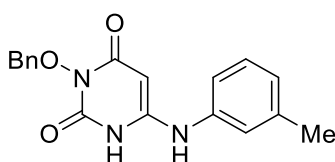

This compound was prepared following the procedure described for the preparation of **10**. Yield: 55%, white solid;  $^1H$ -NMR (400 MHz,  $DMSO-d_6$ )  $\delta$  10.77 (s, 1H), 8.26 (s, 1H), 7.57–7.49 (m, 2H), 7.45–7.38 (m, 3H), 7.29 (t,  $J = 7.7$  Hz, 1H), 7.06–6.98 (m, 3H), 4.99 (s, 2H), 4.79 (s, 1H), 2.32 (s, 3H); HRMS (APCI+) calcd. for  $C_{18}H_{17}N_3O_3$   $[M+H]^+$  324.1348, found 324.1327 ( $E = 6.5$  ppm).

### 3-(Benzyloxy)-6-((4-cyclohexylphenyl)amino)pyrimidine-2,4(1H,3H)-dione (10q)

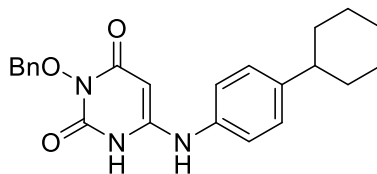

This compound was prepared following the procedure described for the preparation of **10**. Yield: 52%, white solid;  $^1\text{H-NMR}$  (400 MHz,  $\text{DMSO-}d_6$ )  $\delta$  10.76 (s, 1H), 8.23 (s, 1H), 7.53 (dd,  $J = 7.5$ , 2.2 Hz, 2H), 7.45–7.35 (m, 3H), 7.25 (d,  $J = 8.2$  Hz, 2H), 7.14 (d,  $J = 8.2$  Hz, 2H), 4.98 (s, 2H), 4.72 (s, 1H), 1.92–1.62 (m, 5H), 1.38 (td,  $J = 10.0$ , 9.3, 5.4 Hz, 5H); HRMS (ESI+) calcd. for  $\text{C}_{23}\text{H}_{25}\text{N}_3\text{O}_3$   $[\text{M}+\text{H}]^+$  392.1974, found 392.1956 ( $E = 4.6$  ppm).

**3-(Benzyloxy)-6-((4-(piperidin-1-yl)phenyl)amino)pyrimidine-2,4(1H,3H)-dione (10r)**

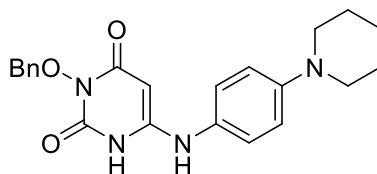

This compound was prepared following the procedure described for the preparation of **10**. Yield: 38%, white solid;  $^1\text{H-NMR}$  (400 MHz,  $\text{DMSO-}d_6$ )  $\delta$  10.70 (s, 1H), 7.99 (s, 1H), 7.52 (dq,  $J = 6.3$ , 2.8, 2.4 Hz, 2H), 7.44–7.36 (m, 3H), 7.09–7.03 (m, 2H), 6.99–6.92 (m, 2H), 4.97 (s, 2H), 4.52 (s, 1H), 3.14 (t,  $J = 5.4$  Hz, 4H), 1.66–1.50 (m, 6H); HRMS (APCI+) calcd. for  $\text{C}_{22}\text{H}_{24}\text{N}_4\text{O}_3$   $[\text{M}+\text{H}]^+$  393.1927, found 393.1918 ( $E = 2.3$  ppm).

**3-(Benzyloxy)-6-((4-(4-methylpiperazin-1-yl)phenyl)amino)pyrimidine-2,4(1H,3H)-dione (10s)**

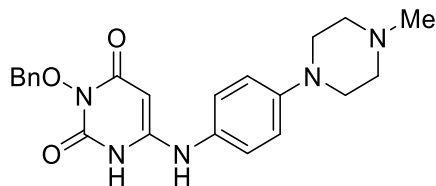

This compound was prepared following the procedure described for the preparation of **10**. Yield: 74%, white solid;  $^1\text{H-NMR}$  (400 MHz,  $\text{DMSO-}d_6$ )  $\delta$  8.59 (s, 1H), 7.63–7.52 (m, 2H), 7.50–7.40 (m, 3H), 7.24–7.14 (m, 2H), 7.13–7.00 (m, 2H), 5.02 (s, 2H), 4.62 (s, 1H), 3.23 (s, 7H), 2.93 (s, 1H), 2.77 (s, 3H); HRMS (ESI+) calcd. for  $\text{C}_{22}\text{H}_{25}\text{N}_5\text{O}_3$   $[\text{M}+\text{H}]^+$  408.2036, found 408.2017 (E = 4.7 ppm).

**3-(Benzyloxy)-6-((4-(oxazol-2-yl)phenyl)amino)pyrimidine-2,4(1H,3H)-dione (10t)**

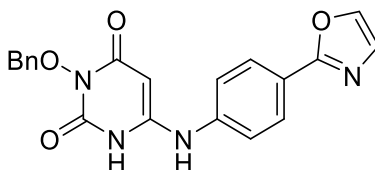

This compound was prepared following the procedure described for the preparation of **10**. Yield: 46%, white solid;  $^1\text{H-NMR}$  (400 MHz,  $\text{DMSO-}d_6$ )  $\delta$  11.04 (s, 1H), 8.83 (s, 1H), 8.27 (d,  $J = 0.8$  Hz, 1H), 8.08–8.02 (m, 2H), 7.66–7.56 (m, 2H), 7.52–7.37 (m, 6H), 5.11 (s, 1H), 5.07 (s, 2H); HRMS (ESI+) calcd. for  $\text{C}_{20}\text{H}_{16}\text{N}_4\text{O}_4$   $[\text{M}+\text{H}]^+$  377.1250, found 377.1224 (E = 6.9 ppm).

**3-(Benzyloxy)-6-((4-(thiazol-4-yl)phenyl)amino)pyrimidine-2,4(1H,3H)-dione (10u)**

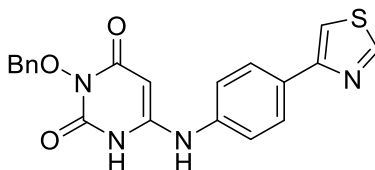

This compound was prepared following the procedure described for the preparation of **10**. Yield: 69%, white solid;  $^1\text{H-NMR}$  (400 MHz,  $\text{DMSO-}d_6$ )  $\delta$  10.88 (s, 1H), 9.21 (d,  $J = 1.9$  Hz, 1H), 8.51 (s, 1H), 8.14 (d,  $J = 1.9$  Hz, 1H), 8.06–7.97 (m, 2H), 7.58–7.49 (m, 2H), 7.45–7.38 (m, 3H), 7.33–7.28 (m, 2H), 5.00 (s, 2H), 4.92 (s, 1H); HRMS (ESI+) calcd. for  $\text{C}_{20}\text{H}_{16}\text{N}_4\text{O}_3\text{S}$   $[\text{M}+\text{H}]^+$  393.1021, found 393.1012 ( $E = 2.3$  ppm).

**6-([1,1'-Biphenyl]-4-ylamino)-3-(benzyloxy)pyrimidine-2,4(1H,3H)-dione (10v)**

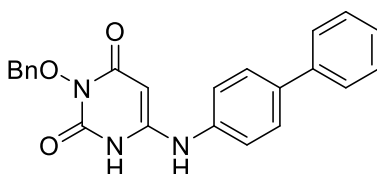

This compound was prepared following the procedure described for the preparation of **10**. Yield: 71%, light brown solid;  $^1\text{H-NMR}$  (400 MHz,  $\text{DMSO-}d_6$ )  $\delta$  10.88 (s, 1H), 8.50 (s, 1H), 7.77–7.62 (m, 5H), 7.53–7.24 (m, 9H), 5.01 (s, 2H), 4.91 (s, 1H); HRMS (ESI-) calcd. for  $\text{C}_{23}\text{H}_{19}\text{N}_3\text{O}_3$   $[\text{M}-\text{H}]^-$  384.1348, found 384.1350 ( $E = 0.5$  ppm).

**3-(Benzyloxy)-6-((3'-methoxy-[1,1'-biphenyl]-4-yl)amino)pyrimidine-2,4(1H,3H)-dione (10w)**

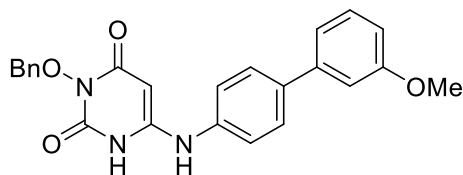

This compound was prepared following the procedure described for the preparation of **10**. Yield: 64%, light brown solid;  $^1\text{H-NMR}$  (400 MHz,  $\text{DMSO-}d_6$ )  $\delta$  10.67 (s, 1H), 10.04 (s, 1H), 8.41 (s, 1H), 7.77–7.64 (m, 2H), 7.38 (t,  $J = 7.9$  Hz, 1H), 7.31–7.26 (m, 2H), 7.23 (ddd,  $J = 7.7, 1.8, 1.0$

Hz, 1H), 7.19 (dd,  $J = 2.5, 1.7$  Hz, 1H), 6.93 (ddd,  $J = 8.2, 2.6, 0.9$  Hz, 1H), 4.91 (s, 1H), 3.83 (s, 3H); HRMS (ESI+) calcd. for  $C_{24}H_{21}N_3O_4$   $[M+H]^+$  416.1610, found 416.1554 ( $E = 13.5$  ppm).

### General Procedure for the Synthesis of 3-(Benzyloxy)-1-methyl-6-(phenylamino)pyrimidine-2,4(1H,3H)-dione (11a-w)

To a solution of amines (0.55 mmol, 1.0 eq) in dry THF (6 mL) at  $-78$  °C was added LDA (1.32 mmol, 2.4 eq). The mixture was stirred for 30 min, followed by the addition of HMPA (2.0 mL) and compound **9** (1.10 mmol, 2.0 eq). The resulting mixture was stirred at  $-78$  °C for 30 min, then room temperature for overnight. The reaction was quenched by adding 10 mL of water. The aqueous was extracted with EtOAc (10 mL  $\times$  3), and the combined organics were washed with brine and dried over  $Na_2SO_4$ . After the solvent was removed in vacuo, the residue was purified by flash column (Hexanes: EtOAc = 1:1) to give compound **11a-n** (38-73%).

### 3-(Benzyloxy)-1-methyl-6-(phenylamino)pyridine-2,4(1H,3H)-dione (11a)

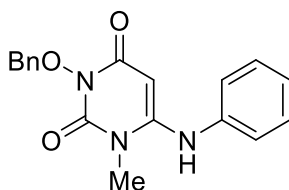

This compound was prepared following the procedure described for the preparation of **11**. Yield: 56%, white solid;  $^1H$ -NMR (400 MHz,  $DMSO-d_6$ )  $\delta$  8.62 (s, 1H), 7.58–7.50 (m, 2H), 7.50–7.43 (m, 2H), 7.43–7.37 (m, 3H), 7.31–7.25 (m, 3H), 4.98 (s, 2H), 4.59 (s, 1H), 3.47 (s, 3H); HRMS (ESI-) calcd. for  $C_{18}H_{17}N_3O_3$   $[M-H]^-$  322.1192, found 322.1192 ( $E = 0$  ppm).

### 3-(Benzyloxy)-6-((4-fluorophenyl)amino)-1-methylpyrimidine-2,4(1H,3H)-dione (11b)

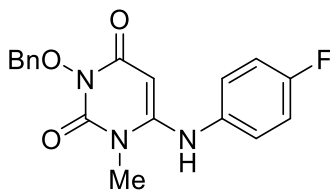

This compound was prepared following the procedure described for the preparation of **11**. Yield: 44%, light brown solid;  $^1\text{H-NMR}$  (400 MHz,  $\text{DMSO-}d_6$ )  $\delta$  8.60 (s, 1H), 7.53 (dq,  $J = 6.6, 2.4$  Hz, 2H), 7.45–7.38 (m, 3H), 7.34–7.28 (m, 4H), 4.97 (s, 2H), 4.47 (s, 1H), 3.46 (s, 3H); HRMS (ESI+) calcd. for  $\text{C}_{18}\text{H}_{16}\text{FN}_3\text{O}_3$   $[\text{M}+\text{H}]^+$  342.1254, found 342.1248 ( $E = 1.8$  ppm).

**3-(Benzyloxy)-6-((4-chlorophenyl)amino)-1-methylpyrimidine-2,4(1H,3H)-dione (11c)**

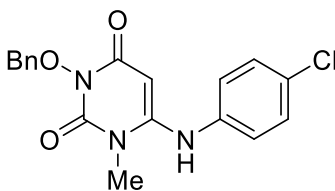

This compound was prepared following the procedure described for the preparation of **11**. Yield: 73%, white solid;  $^1\text{H-NMR}$  (400 MHz,  $\text{DMSO-}d_6$ )  $\delta$  8.71 (s, 1H), 7.64–7.54 (m, 4H), 7.51–7.44 (m, 3H), 7.39–7.32 (m, 2H), 5.05 (s, 2H), 4.71 (s, 1H), 3.52 (s, 3H); HRMS (ESI-) calcd. for  $\text{C}_{18}\text{H}_{16}\text{ClN}_3\text{O}_3$   $[\text{M}-\text{H}]^-$  356.0802, found 356.0822 ( $E = 5.6$  ppm).

**3-(Benzyloxy)-1-methyl-6-((4-(trifluoromethyl)phenyl)amino)pyrimidine-2,4(1H,3H)-dione (11d)**

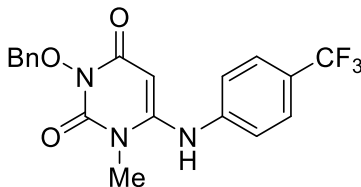

This compound was prepared following the procedure described for the preparation of **11**. Yield: 39%, light brown solid;  $^1\text{H-NMR}$  (400 MHz,  $\text{DMSO-}d_6$ )  $\delta$  8.85 (s, 1H), 7.76 (d,  $J = 8.4$  Hz, 2H), 7.60–7.49 (m, 2H), 7.49–7.34 (m, 5H), 5.00 (s, 2H), 4.96 (s, 1H), 3.44 (s, 3H); HRMS (ESI-) calcd. for  $\text{C}_{19}\text{H}_{16}\text{F}_3\text{N}_3\text{O}_3$   $[\text{M-H}]^-$  390.1066, found 390.1080 ( $E = 3.6$  ppm).

### 3-(Benzyloxy)-6-((3-fluorophenyl)amino)-1-methylpyrimidine-2,4(1H,3H)-dione (**11e**)

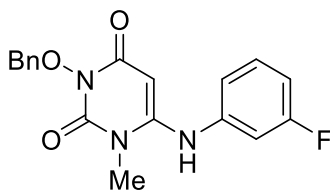

This compound was prepared following the procedure described for the preparation of **11**. Yield: 42%, white solid;  $^1\text{H-NMR}$  (400 MHz,  $\text{DMSO-}d_6$ )  $\delta$  8.70 (s, 1H), 7.58–7.53 (m, 2H), 7.51–7.45 (m, 1H), 7.45–7.37 (m, 3H), 7.17–6.99 (m, 3H), 4.99 (s, 2H), 4.78 (s, 1H), 3.45 (s, 3H); HRMS (ESI-) calcd. for  $\text{C}_{18}\text{H}_{16}\text{FN}_3\text{O}_3$   $[\text{M-H}]^-$  340.1097, found 340.1113 ( $E = 4.7$  ppm).

### 3-(Benzyloxy)-6-((3-bromophenyl)amino)-1-methylpyrimidine-2,4(1H,3H)-dione (**11f**)

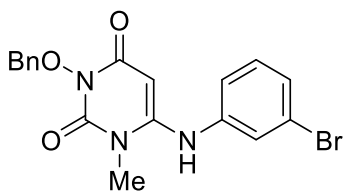

This compound was prepared following the procedure described for the preparation of **11**. Yield: 56%, white solid;  $^1\text{H-NMR}$  (400 MHz,  $\text{DMSO-}d_6$ )  $\delta$  8.69 (s, 1H), 7.54 (dd,  $J = 7.4, 2.1$  Hz, 2H), 7.48 (t,  $J = 1.9$  Hz, 1H), 7.46–7.36 (m, 5H), 7.29 (dt,  $J = 7.6, 1.8$  Hz, 1H), 4.99 (s, 2H), 4.73 (s, 1H), 3.44 (s, 3H); HRMS (ESI+) calcd. for  $\text{C}_{18}\text{H}_{16}\text{BrN}_3\text{O}_3$   $[\text{M+H}]^+$  402.0453, found 402.0449 ( $E = 1.0$  ppm).

**3-(Benzyloxy)-6-((2-fluorophenyl)amino)-1-methylpyrimidine-2,4(1H,3H)-dione (11g)**

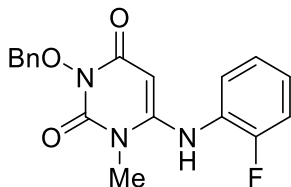

This compound was prepared following the procedure described for the preparation of **11**. Yield: 51%, white solid;  $^1\text{H-NMR}$  (400 MHz,  $\text{DMSO-}d_6$ )  $\delta$  8.63 (s, 1H), 7.56–7.49 (m, 2H), 7.40 (tdd,  $J$  = 8.4, 5.4, 3.0 Hz, 6H), 7.32 (ddd,  $J$  = 8.2, 6.3, 2.2 Hz, 1H), 4.98 (s, 2H), 4.26 (d,  $J$  = 1.6 Hz, 1H), 3.48 (s, 3H); HRMS (ESI+) calcd. for  $\text{C}_{18}\text{H}_{16}\text{FN}_3\text{O}_3$   $[\text{M}+\text{H}]^+$  342.1254, found 342.1239 ( $E$  = 4.4 ppm).

**3-(Benzyloxy)-6-((3,4-difluorophenyl)amino)-1-methylpyrimidine-2,4(1H,3H)-dione (11h)**

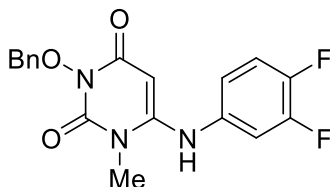

This compound was prepared following the procedure described for the preparation of **11**. Yield: 41%, white solid;  $^1\text{H-NMR}$  (400 MHz,  $\text{DMSO-}d_6$ )  $\delta$  8.67 (s, 1H), 7.56–7.52 (m, 2H), 7.52–7.46 (m, 1H), 7.45–7.34 (m, 4H), 7.13 (ddt,  $J$  = 7.9, 3.4, 1.9 Hz, 1H), 4.98 (s, 2H), 4.65 (s, 1H), 3.44 (s, 3H); HRMS (ESI+) calcd. for  $\text{C}_{18}\text{H}_{15}\text{F}_2\text{N}_3\text{O}_3$   $[\text{M}+\text{H}]^+$  360.1160, found 360.1142 ( $E$  = 5.0 ppm).

**3-(Benzyloxy)-1-methyl-6-(p-tolylamino)pyrimidine-2,4(1H,3H)-dione (11i)**

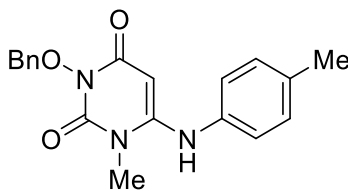

This compound was prepared following the procedure described for the preparation of **11**. Yield: 43%, white solid;  $^1\text{H-NMR}$  (400 MHz,  $\text{DMSO-}d_6$ )  $\delta$  8.55 (s, 1H), 7.58–7.49 (m, 2H), 7.45–7.35 (m, 3H), 7.27 (d,  $J = 8.0$  Hz, 2H), 7.21–7.10 (m, 2H), 4.97 (s, 2H), 4.49 (s, 1H), 3.46 (s, 3H), 2.33 (s, 3H); HRMS (ESI<sup>-</sup>) calcd. for  $\text{C}_{19}\text{H}_{19}\text{N}_3\text{O}_3$   $[\text{M-H}]^-$  336.1348, found 336.1358 ( $E = 3.0$  ppm).

### 3-(Benzyloxy)-6-((4-(tert-butyl)phenyl)amino)-1-methylpyrimidine-2,4(1H,3H)-dione (**11j**)

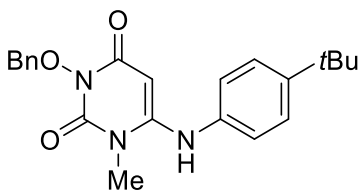

This compound was prepared following the procedure described for the preparation of **11**. Yield: 59%, light beige solid;  $^1\text{H-NMR}$  (400 MHz,  $\text{DMSO-}d_6$ )  $\delta$  8.55 (s, 1H), 7.56–7.51 (m, 2H), 7.50–7.45 (m, 2H), 7.44–7.37 (m, 3H), 7.22–7.15 (m, 2H), 4.97 (s, 2H), 4.54 (s, 1H), 3.46 (s, 3H), 1.31 (s, 9H); HRMS (ESI<sup>+</sup>) calcd. for  $\text{C}_{22}\text{H}_{25}\text{N}_3\text{O}_3$   $[\text{M+H}]^+$  380.1974, found 380.1956 ( $E = 3.0$  ppm).

### 3-(Benzyloxy)-6-((4-methoxyphenyl)amino)-1-methylpyrimidine-2,4(1H,3H)-dione (**11k**)

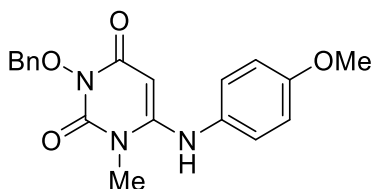

This compound was prepared following the procedure described for the preparation of **11**. Yield: 43%, light beige solid;  $^1\text{H-NMR}$  (400 MHz,  $\text{DMSO-}d_6$ )  $\delta$  8.42 (s, 1H), 7.49–7.39 (m, 2H), 7.37–

7.27 (m, 3H), 7.15–7.06 (m, 2H), 6.98–6.86 (m, 2H), 4.87 (s, 2H), 4.28 (s, 1H), 3.70 (s, 3H), 3.36 (s, 3H); HRMS (ESI-) calcd. for C<sub>19</sub>H<sub>19</sub>N<sub>3</sub>O<sub>4</sub> [M+H]<sup>+</sup> 352.1297, found 352.1300 (E = 0.9 ppm).

**3-(Benzyloxy)-6-((4-methoxyphenyl)amino)-1-methylpyrimidine-2,4(1H,3H)-dione (11l)**

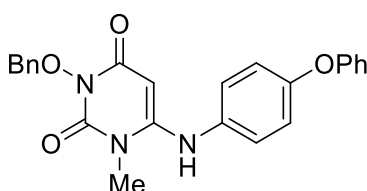

This compound was prepared following the procedure described for the preparation of **11**. Yield: 38%, white solid; <sup>1</sup>H-NMR (400 MHz, DMSO-*d*<sub>6</sub>) δ 8.58 (s, 1H), 7.53 (dd, *J* = 7.4, 2.2 Hz, 2H), 7.42 (dtt, *J* = 11.1, 5.7, 2.0 Hz, 5H), 7.31–7.25 (m, 2H), 7.21–7.15 (m, 1H), 7.12–7.05 (m, 4H), 4.98 (s, 2H), 4.54 (s, 1H), 3.46 (s, 3H); HRMS (ESI-) calcd. for C<sub>24</sub>H<sub>21</sub>N<sub>3</sub>O<sub>4</sub> [M+H]<sup>+</sup> 416.1610, found 416.1602 (E = 1.9 ppm).

**3-(Benzyloxy)-6-((4-cyclohexylphenyl)amino)-1-methylpyrimidine-2,4(1H,3H)-dione (11m)**

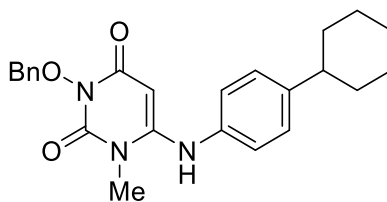

This compound was prepared following the procedure described for the preparation of **11**. Yield: 43%, light beige solid; <sup>1</sup>H-NMR (400 MHz, DMSO-*d*<sub>6</sub>) δ 8.54 (s, 1H), 7.59–7.48 (m, 2H), 7.45–7.38 (m, 3H), 7.34–7.26 (m, 2H), 7.22–7.13 (m, 2H), 4.97 (s, 2H), 4.52 (s, 1H), 3.46 (s, 3H), 1.81 (d, *J* = 6.8 Hz, 4H), 1.72 (d, *J* = 12.7 Hz, 1H), 1.46–1.33 (m, 3H), 1.24 (s, 2H); HRMS (ESI+) calcd. for C<sub>24</sub>H<sub>21</sub>N<sub>3</sub>O<sub>4</sub> [M+H]<sup>+</sup> 406.2131, found 406.2112 (E = 4.7 ppm).

**3-(Benzyloxy)-1-methyl-6-((4-(piperidin-1-yl)phenyl)amino)pyrimidine-2,4(1H,3H)-dione**  
**(11n)**

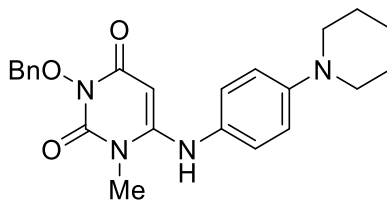

This compound was prepared following the procedure described for the preparation of **11**. Yield: 49%, light brown solid;  $^1\text{H-NMR}$  (400 MHz,  $\text{DMSO-}d_6$ )  $\delta$  8.44 (s, 1H), 7.57–7.49 (m, 2H), 7.45–7.37 (m, 3H), 7.12–7.04 (m, 2H), 7.02–6.96 (m, 2H), 4.96 (s, 2H), 4.38 (s, 1H), 3.44 (s, 3H), 3.20–3.13 (m, 4H), 1.69–1.50 (m, 6H); HRMS (ESI-) calcd. for  $\text{C}_{23}\text{H}_{26}\text{N}_4\text{O}_3$   $[\text{M-H}]^-$  405.1927, found 405.1949 (E = 5.4 ppm).

# $^1\text{H}$ NMR and $^{13}\text{C}$ NMR for Compound 2a in $\text{DMSO-}d_6$

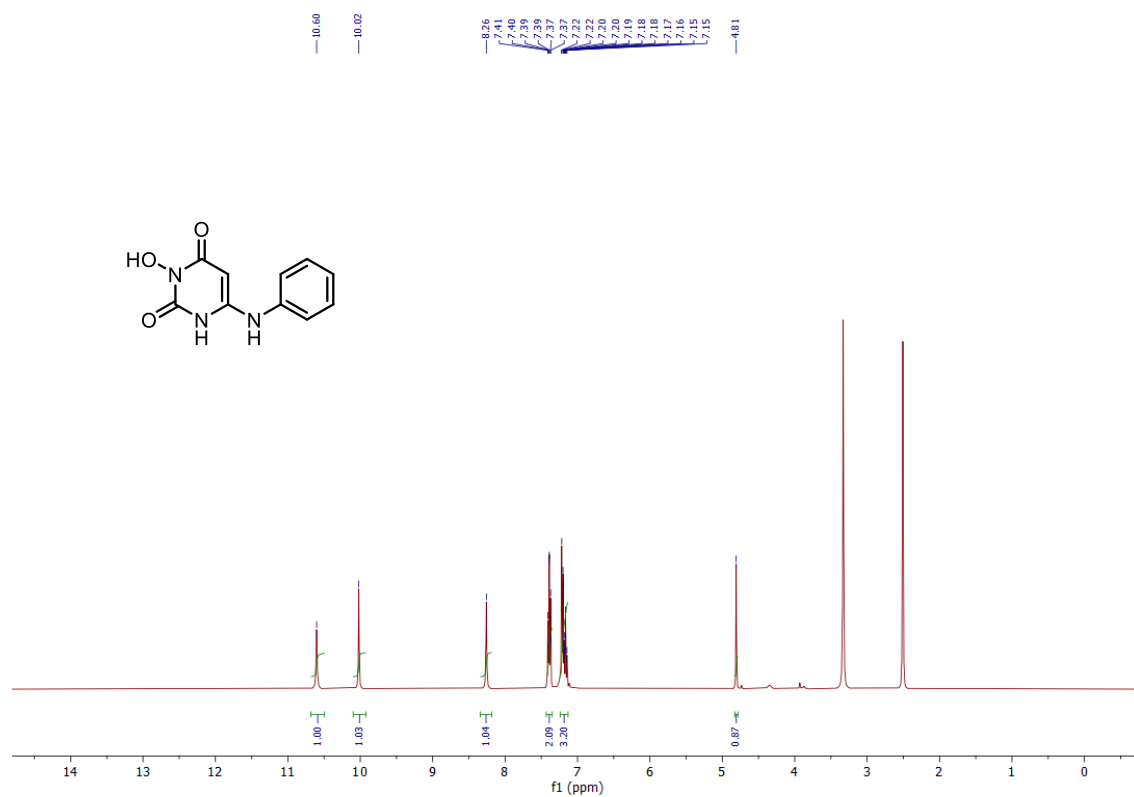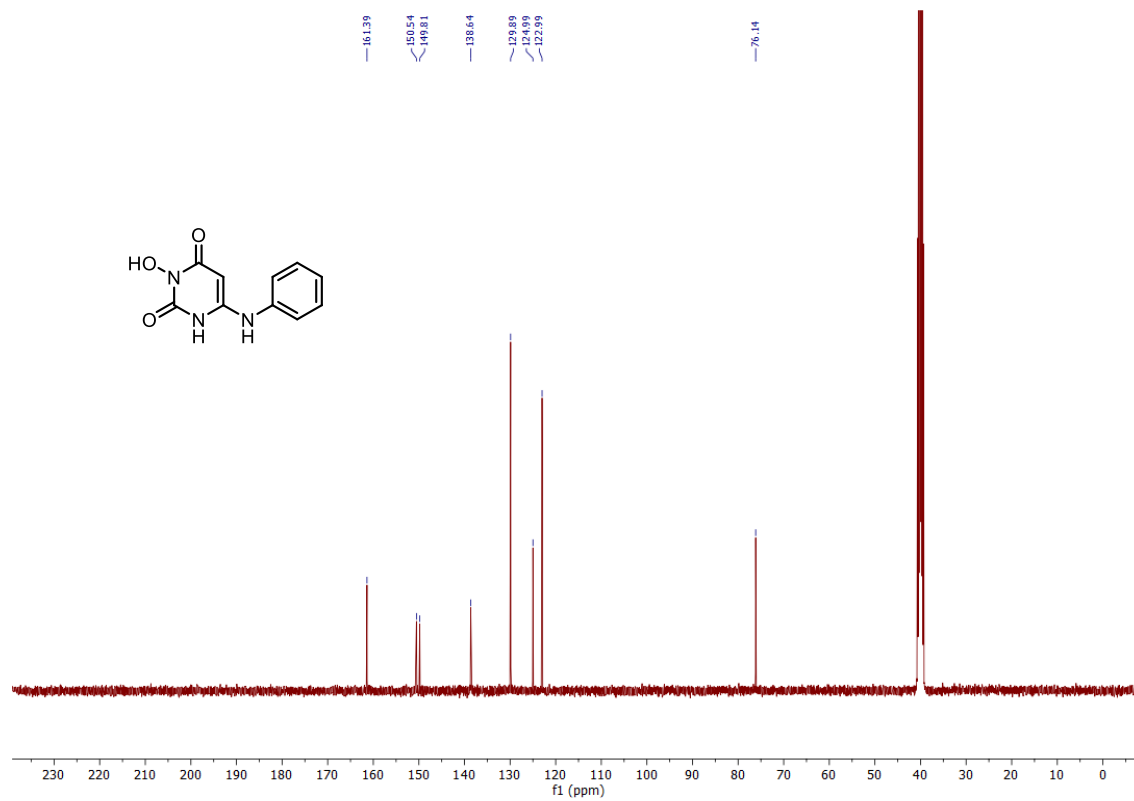

# HRMS and HPLC Trace for Compound 2a

|                    |                    |                               |         |                        |                                        |
|--------------------|--------------------|-------------------------------|---------|------------------------|----------------------------------------|
| <b>Sample Name</b> | MS-03-169depro     | <b>Position</b>               | P1-D10  | <b>Instrument Name</b> | TOF Walk Up                            |
| <b>User Name</b>   | Syafiq             | <b>Inj Vol</b>                | 1       | <b>InjPosition</b>     |                                        |
| <b>Sample Type</b> | Sample             | <b>IRM Calibration Status</b> | Success | <b>Data Filename</b>   | MMI_ESI_Negative_MS-03-169depro_1521.d |
| <b>ACQ Method</b>  | MMI_ESI_Negative.m | <b>Comment</b>                |         | <b>Acquired Time</b>   | 2/19/2025 7:09:58 PM (UTC-06:00)       |

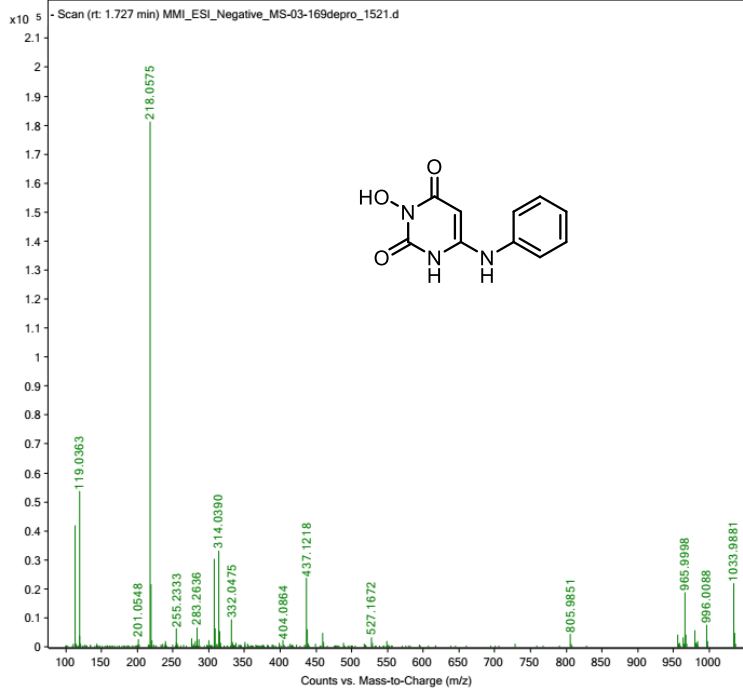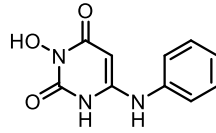

Sample Info : MS-03-169(1)

Additional Info : Peak(s) manually integrated

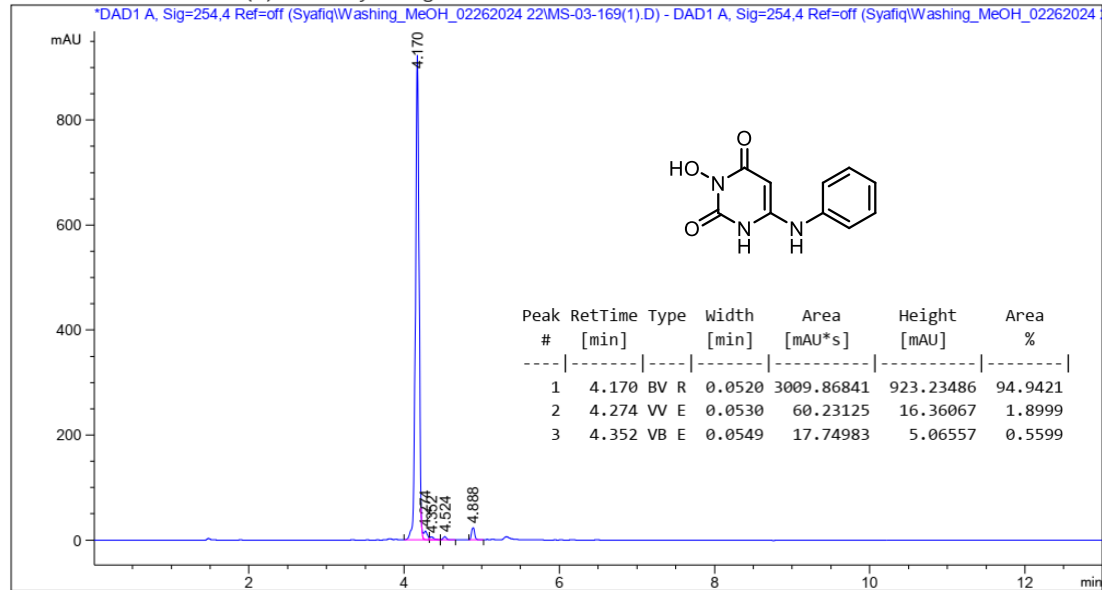

# $^1\text{H}$ NMR and $^{13}\text{C}$ NMR for Compound 2b in $\text{DMSO-}d_6$

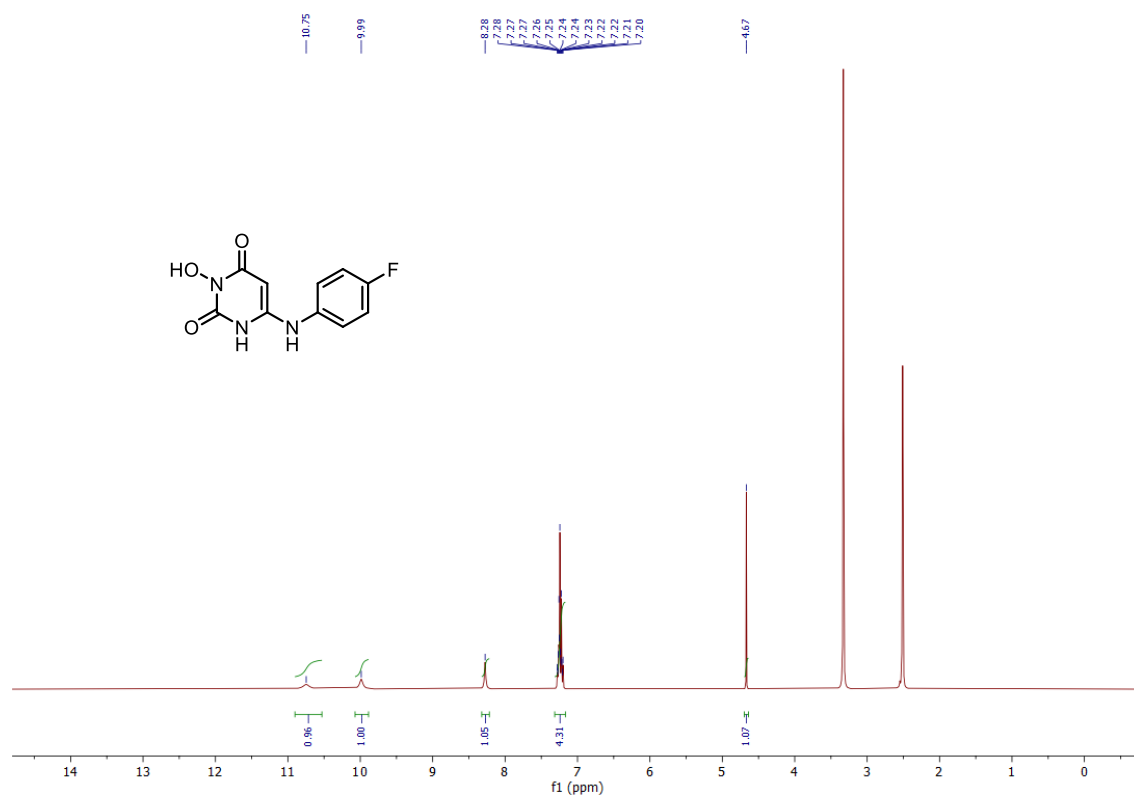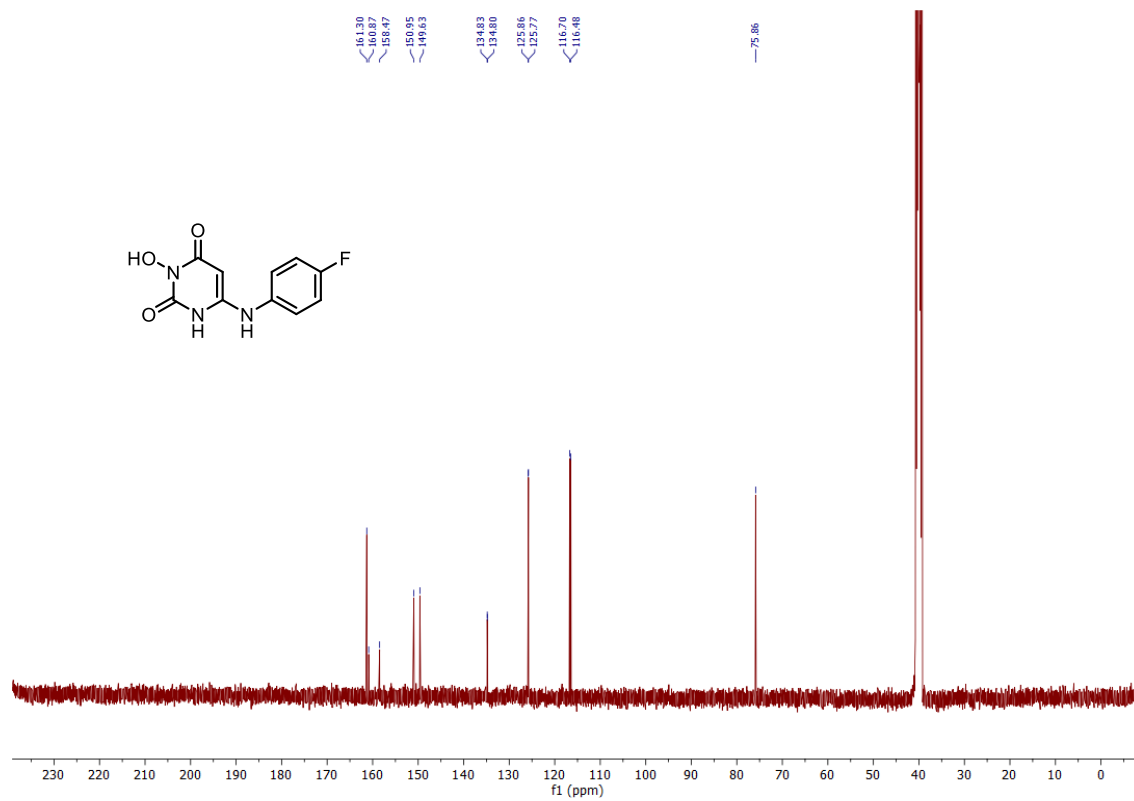

# HRMS and HPLC Trace for Compound 2b

|                    |                     |                               |         |                        |                                         |
|--------------------|---------------------|-------------------------------|---------|------------------------|-----------------------------------------|
| <b>Sample Name</b> | MS-03-171depro      | <b>Position</b>               | P1-C10  | <b>Instrument Name</b> | TOF Walk Up                             |
| <b>User Name</b>   | Syafiq              | <b>Inj Vol</b>                | 1       | <b>Inj Position</b>    |                                         |
| <b>Sample Type</b> | Sample              | <b>IRM Calibration Status</b> | Success | <b>Data Filename</b>   | MMI_APCI_Positive_MS-03-171depro_1490.d |
| <b>ACQ Method</b>  | MMI_APCI_Positive.m | <b>Comment</b>                |         | <b>Acquired Time</b>   | 2/19/2025 10:26:28 AM (UTC-06:00)       |

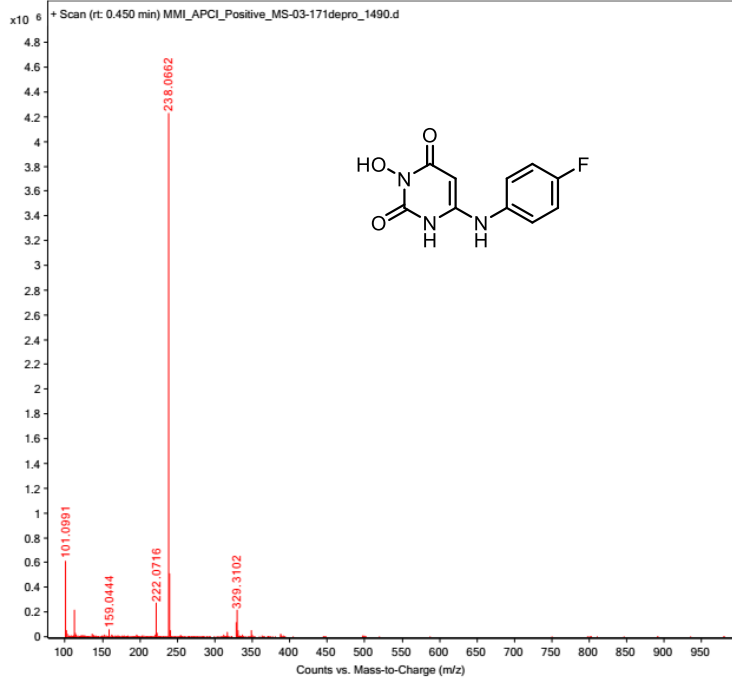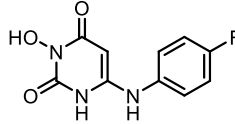

Sample Info : MS-03-171(1)

Additional Info : Peak(s) manually integrated

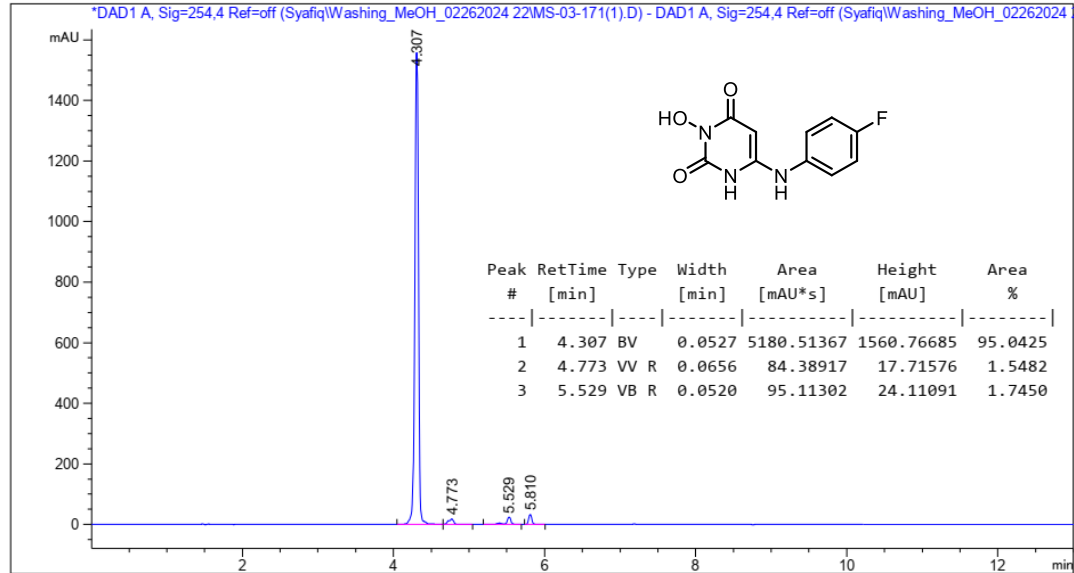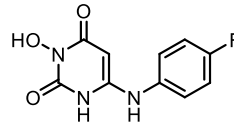

# $^1\text{H}$ NMR and $^{13}\text{C}$ NMR for Compound 2c in $\text{DMSO-}d_6$

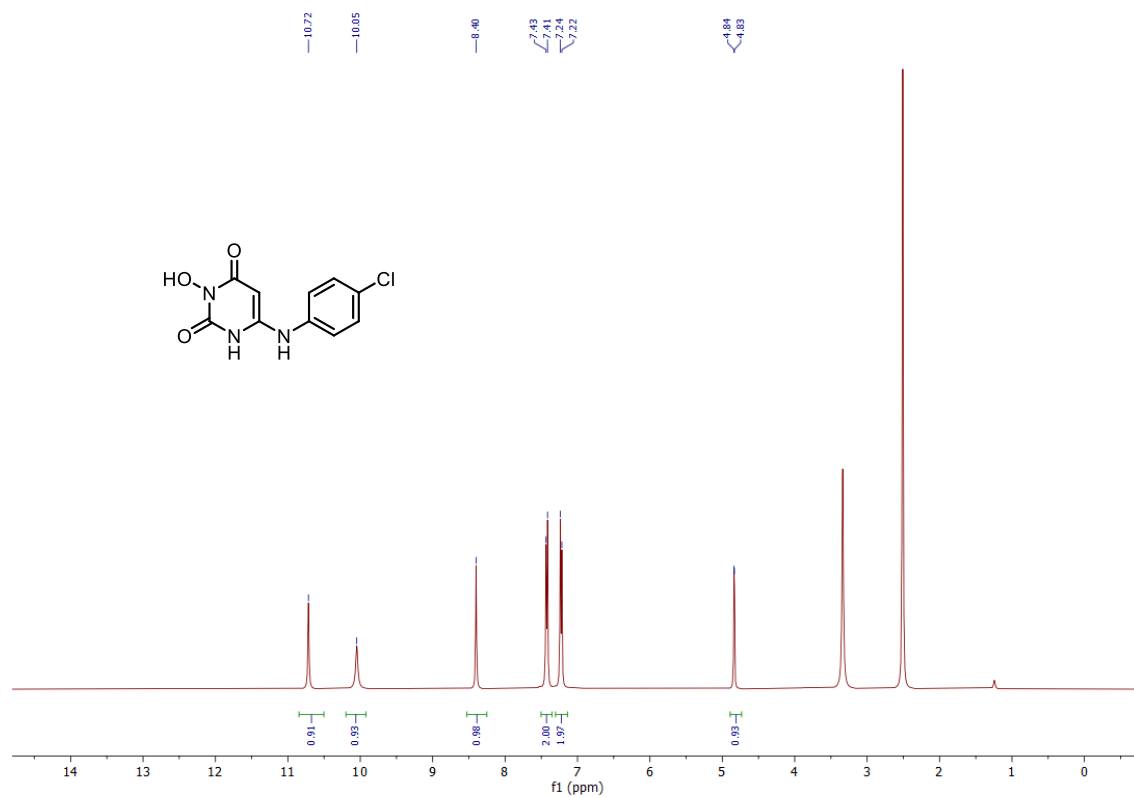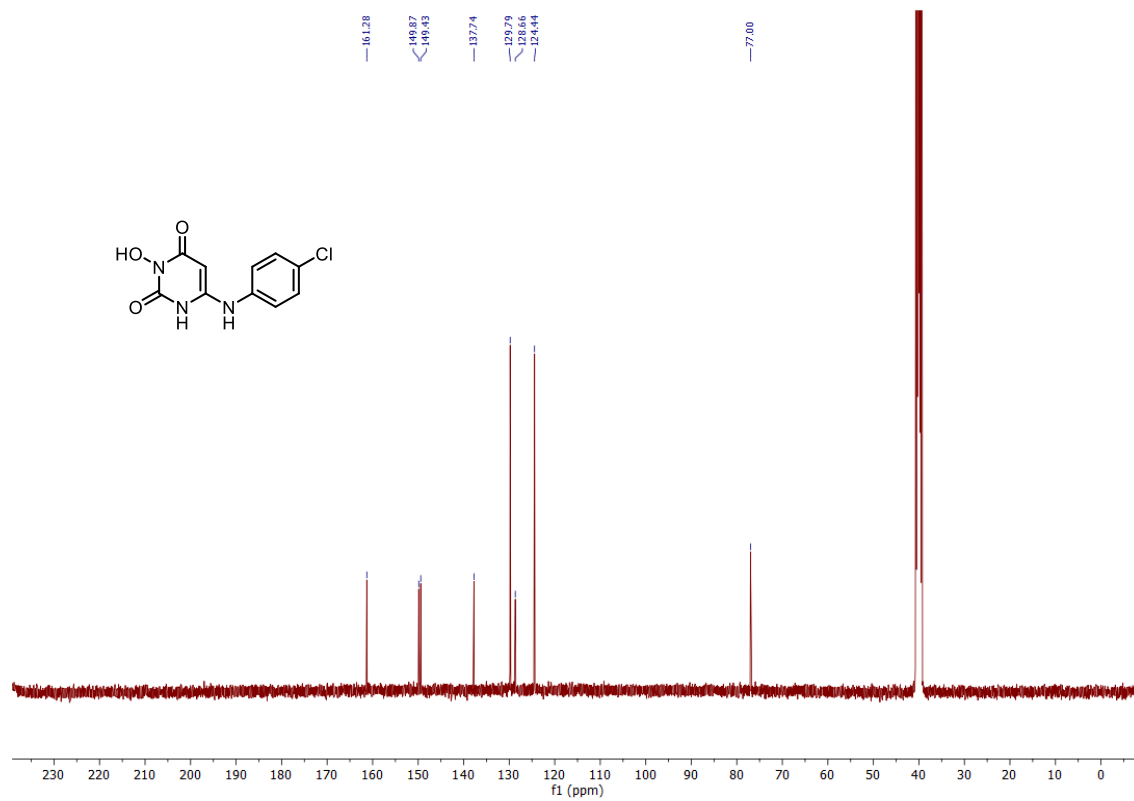

# HRMS for Compound 2c

|             |                    |                        |         |                 |                                         |
|-------------|--------------------|------------------------|---------|-----------------|-----------------------------------------|
| Sample Name | MS-04-113 depro    | Position               | P1-A9   | Instrument Name | TOF Walk Up                             |
| User Name   | Syafiq             | Inj Vol                | 1       | InjPosition     |                                         |
| Sample Type | Sample             | IRM Calibration Status | Success | Data Filename   | MMI_ESI_Positive_MS-04-113 depro_0559.d |
| ACQ Method  | MMI_ESI_Positive.m | Comment                |         | Acquired Time   | 12/12/2025 9:26:49 AM (UTC-06:00)       |

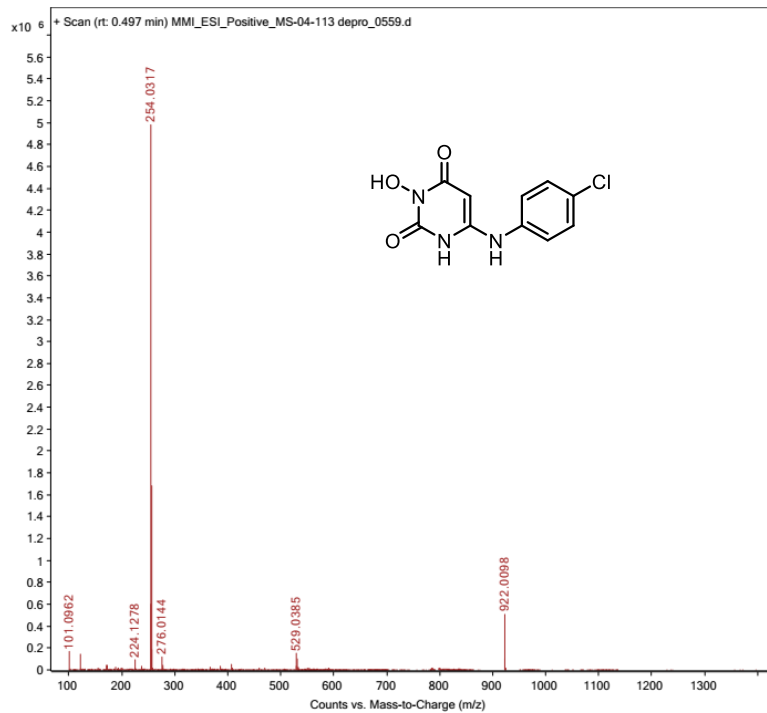

# $^1\text{H}$ NMR and $^{13}\text{C}$ NMR for Compound 2d in $\text{DMSO-}d_6$

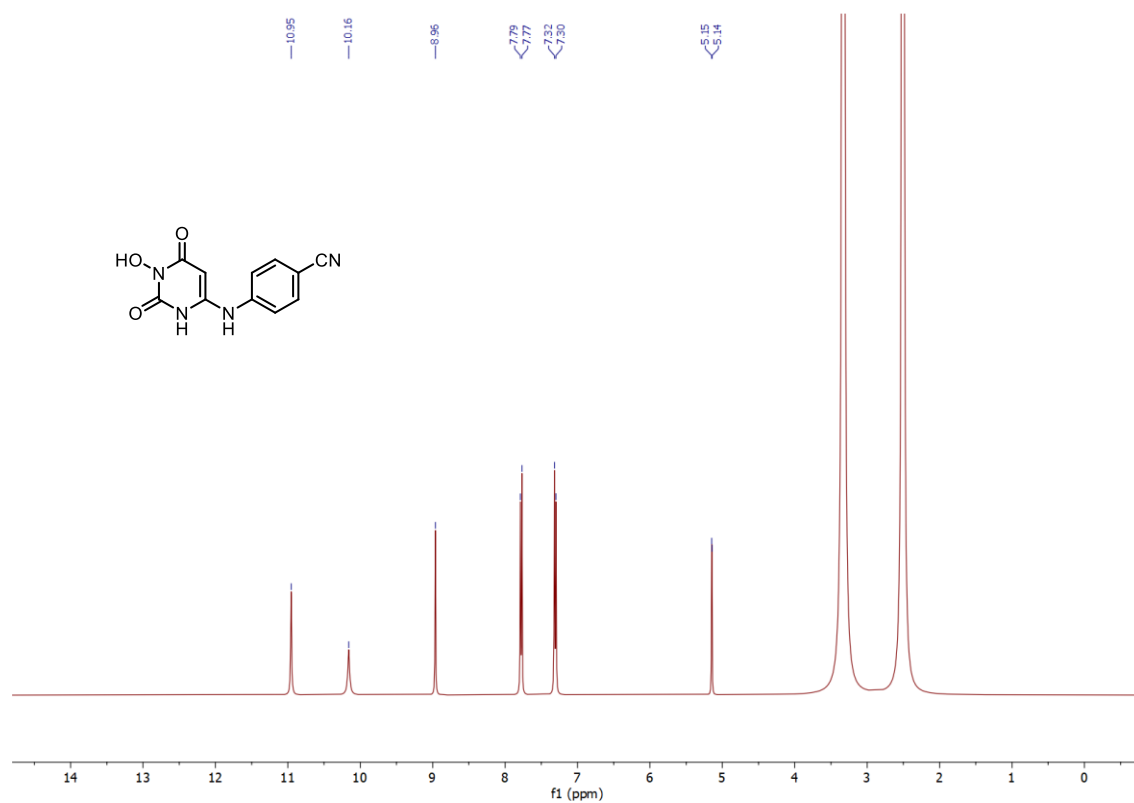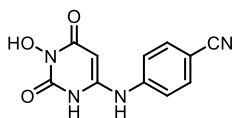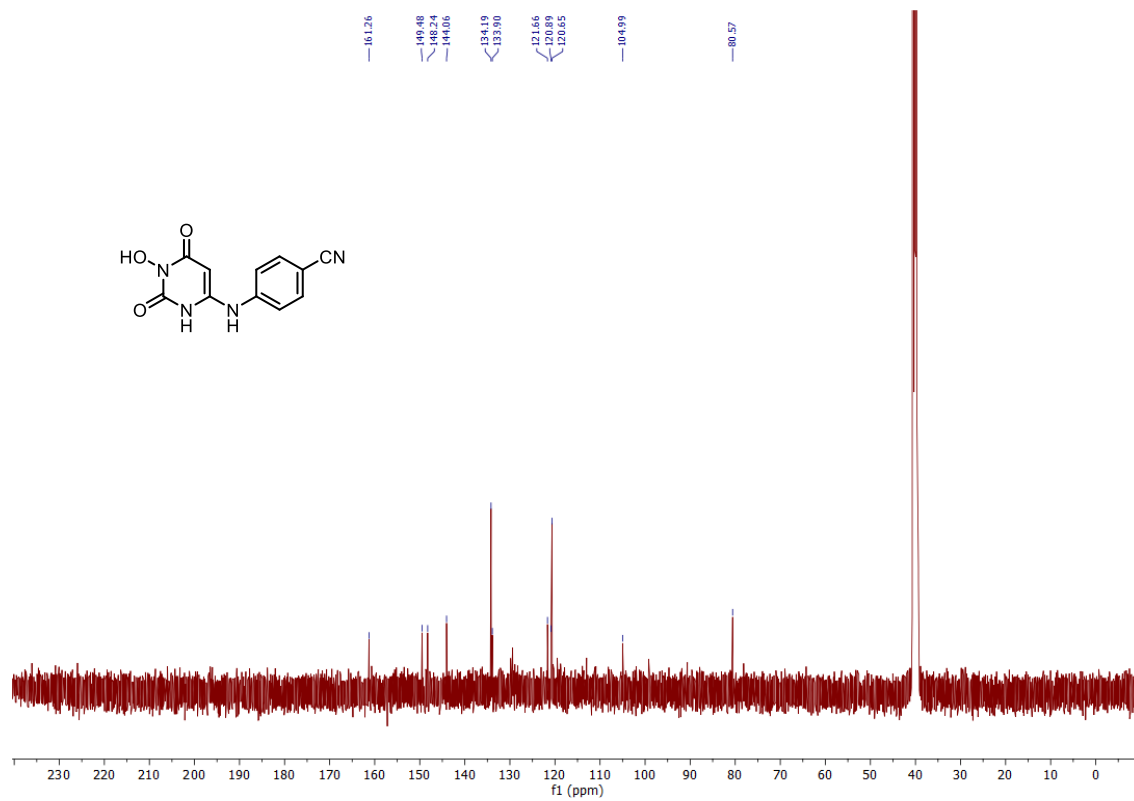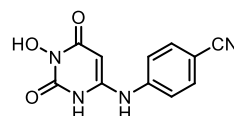

# HRMS for Compound 2d

**Sample Name** MS-03-213 depro  
**User Name** Syafiq  
**Sample Type** Sample  
**ACQ Method** MMI\_ESI\_Negative.m

**Position** P2-A3  
**Inj Vol** 1  
**IRM Calibration Status** Success  
**Comment**

**Instrument Name** TOF Walk Up  
**InjPosition**  
**Data Filename** MMI\_ESI\_Negative\_MS-03-213 depro\_0661.d  
**Acquired Time** 12/17/2025 11:55:43 AM (UTC-06:00)

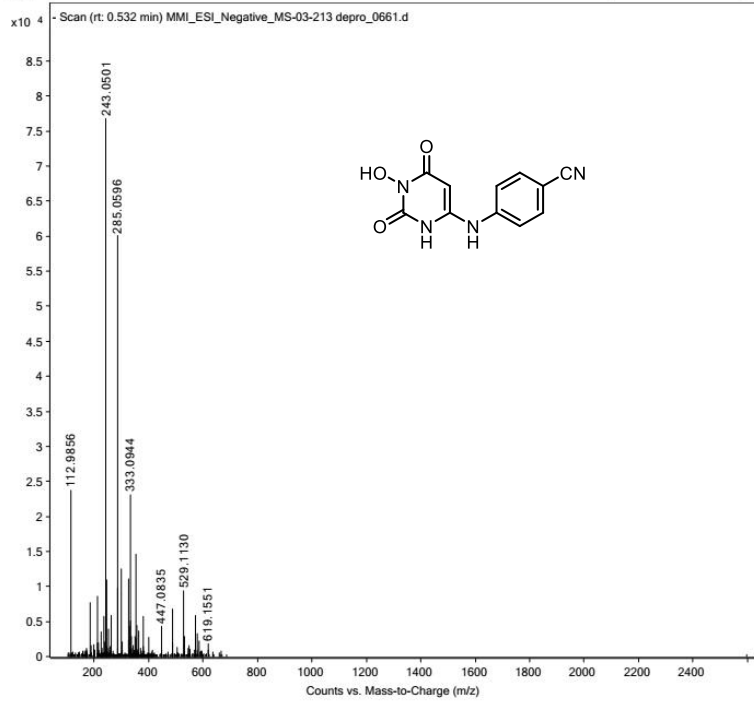

# <sup>1</sup>H NMR and <sup>13</sup>C NMR for Compound 2e in DMSO-*d*<sub>6</sub>

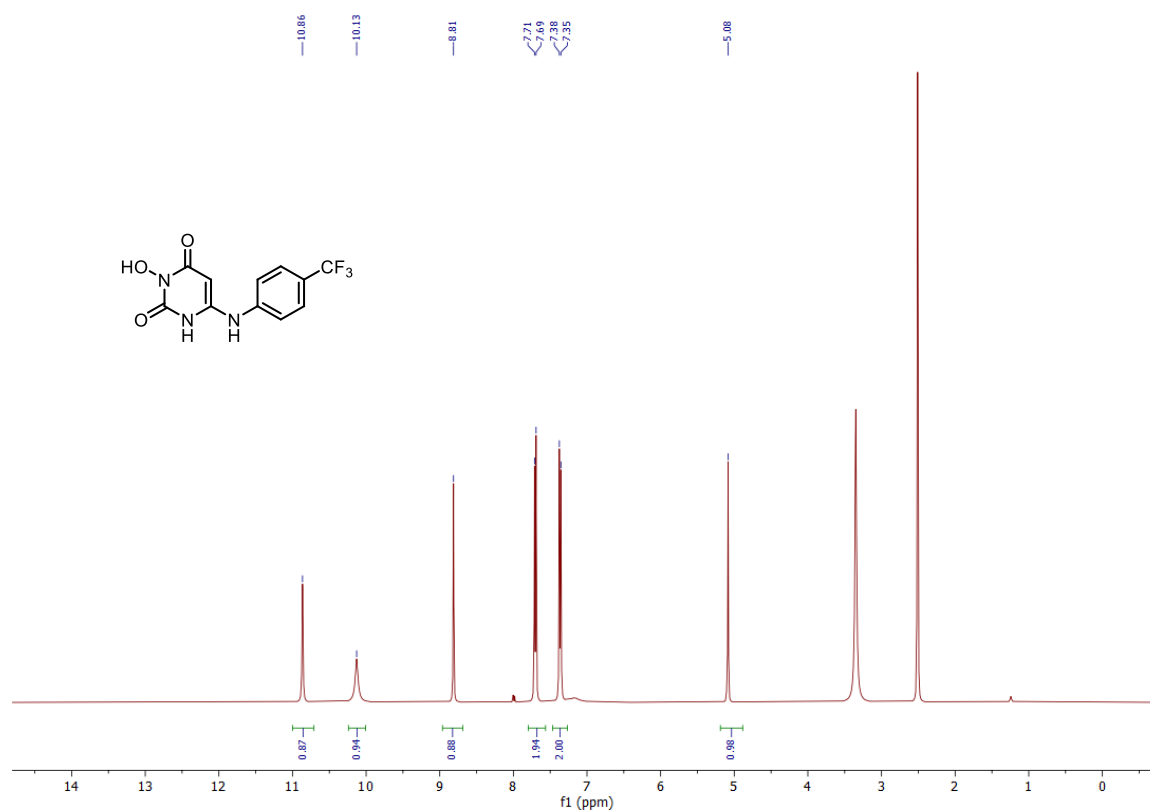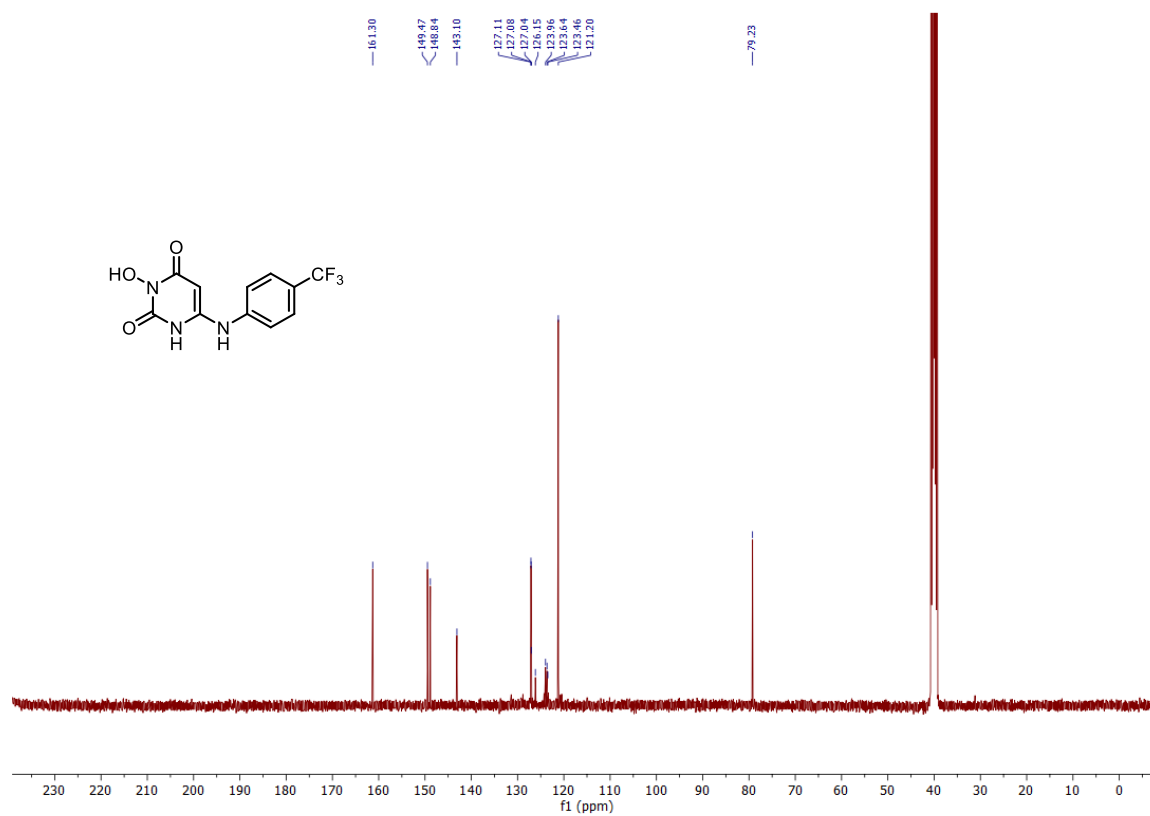

# HRMS for Compound 2e

|                    |                    |                               |         |                        |                                         |
|--------------------|--------------------|-------------------------------|---------|------------------------|-----------------------------------------|
| <b>Sample Name</b> | MS-03-167 depro    | <b>Position</b>               | P1-F4   | <b>Instrument Name</b> | TOF Walk Up                             |
| <b>User Name</b>   | Syafiq             | <b>Inj Vol</b>                | 1       | <b>InjPosition</b>     |                                         |
| <b>Sample Type</b> | Sample             | <b>IRM Calibration Status</b> | Success | <b>Data Filename</b>   | MMI_ESI_Positive_MS-03-167 depro_5606.d |
| <b>ACQ Method</b>  | MMI_ESI_Positive.m | <b>Comment</b>                |         | <b>Acquired Time</b>   | 7/2/2025 11:08:43 AM (UTC-05:00)        |

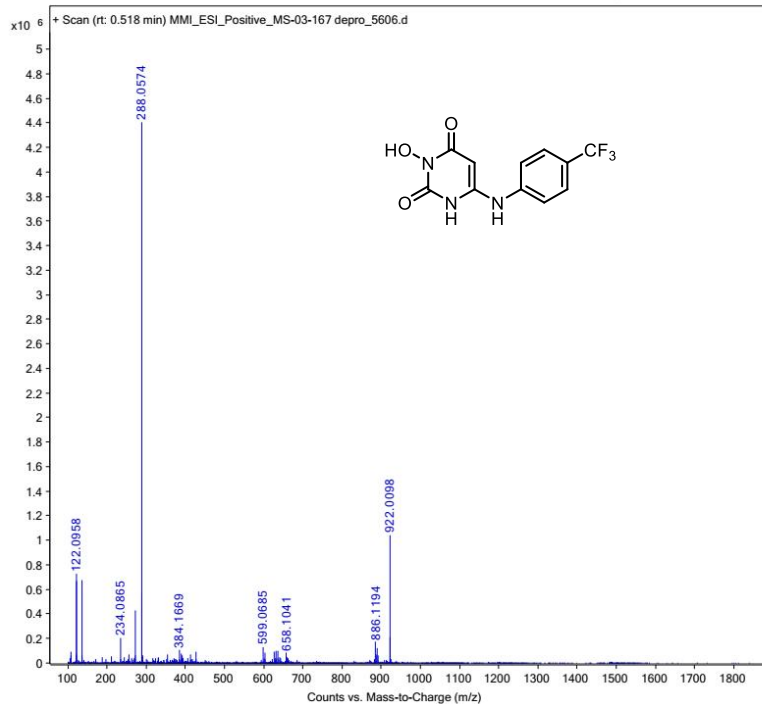

# $^1\text{H}$ NMR and $^{13}\text{C}$ NMR for Compound 2f in $\text{DMSO-}d_6$

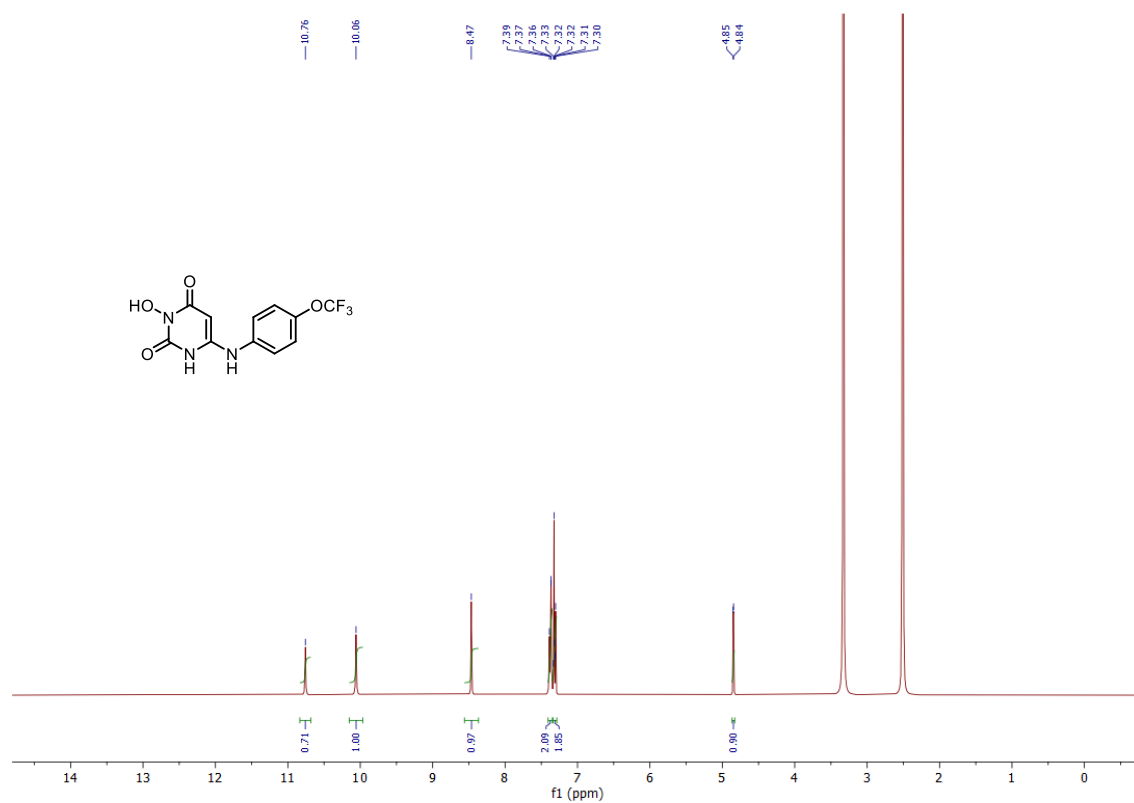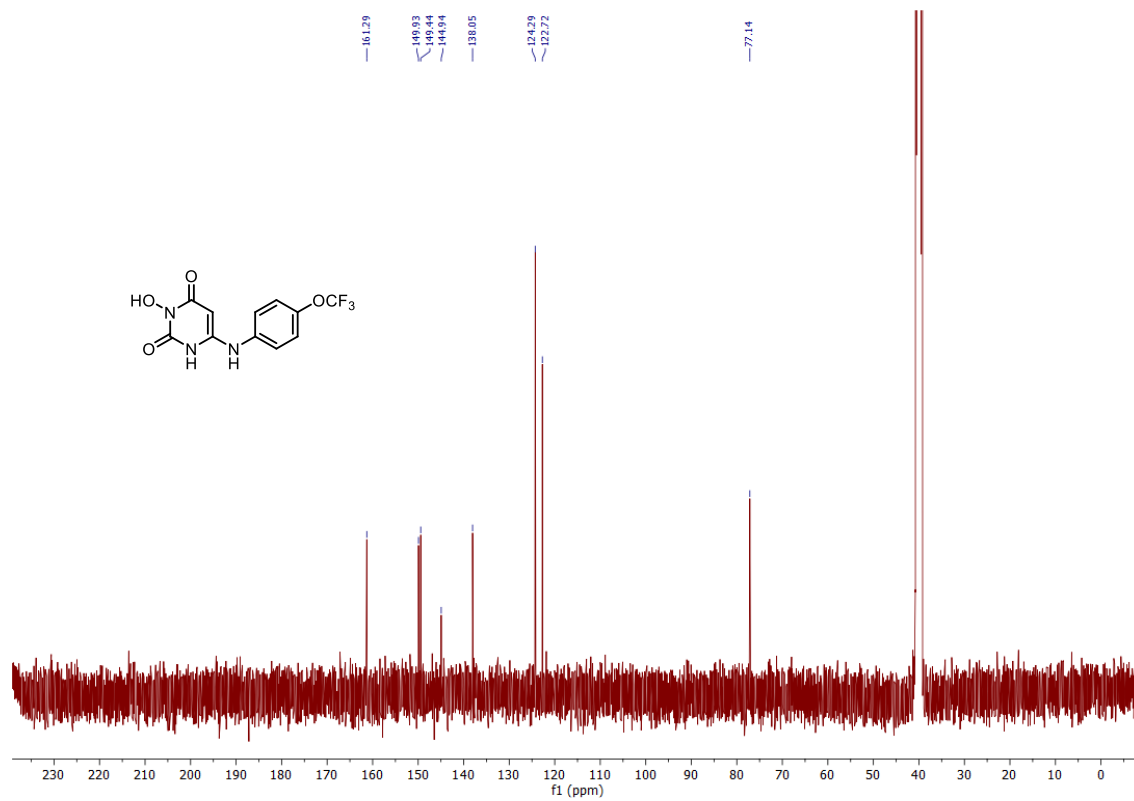

# HRMS for Compound 2f

|                    |                    |                               |         |                        |                                         |
|--------------------|--------------------|-------------------------------|---------|------------------------|-----------------------------------------|
| <b>Sample Name</b> | MS-03-237 depro    | <b>Position</b>               | P2-B9   | <b>Instrument Name</b> | TOF Walk Up                             |
| <b>User Name</b>   | Syafiq             | <b>Inj Vol</b>                | 1       | <b>InjPosition</b>     |                                         |
| <b>Sample Type</b> | Sample             | <b>IRM Calibration Status</b> | Success | <b>Data Filename</b>   | MMI_ESI_Negative_MS-03-237 depro_6378.d |
| <b>ACQ Method</b>  | MMI_ESI_Negative.m | <b>Comment</b>                |         | <b>Acquired Time</b>   | 7/23/2025 5:30:41 PM (UTC-05:00)        |

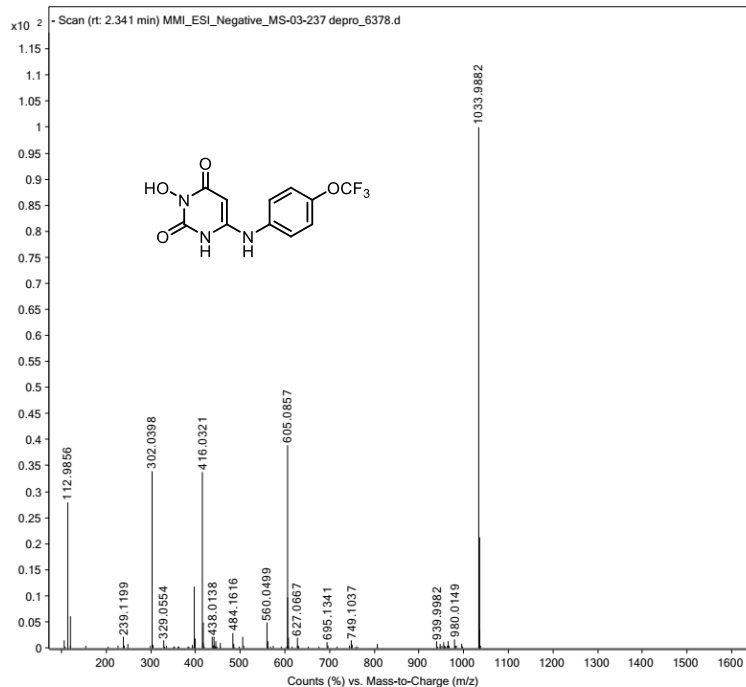

# <sup>1</sup>H NMR and <sup>13</sup>C NMR for Compound 2g in DMSO-d<sub>6</sub>

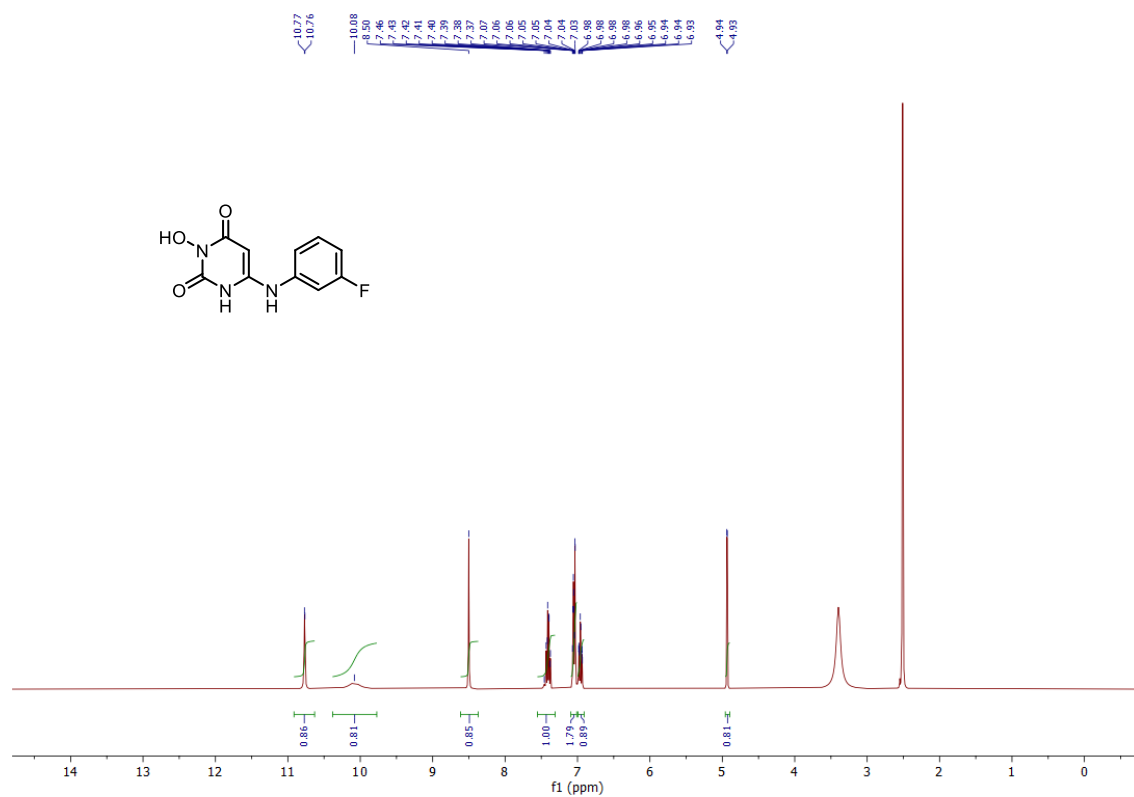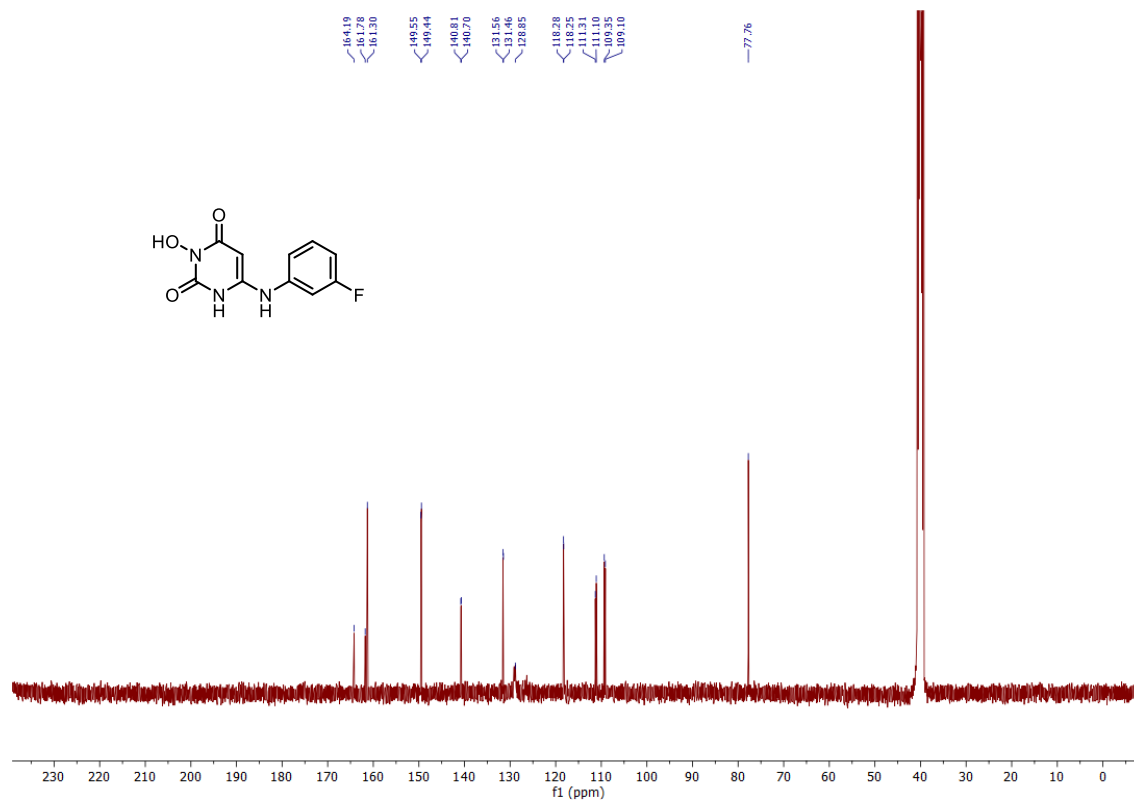

# HRMS for Compound 2g

|             |                    |                        |         |                 |                                         |
|-------------|--------------------|------------------------|---------|-----------------|-----------------------------------------|
| Sample Name | MS-03-177 depro    | Position               | P2-C7   | Instrument Name | TOF Walk Up                             |
| User Name   | Syafiq             | Inj Vol                | 1       | InjPosition     |                                         |
| Sample Type | Sample             | IRM Calibration Status | Success | Data Filename   | MMI_ESI_Positive_MS-03-177 depro_3057.d |
| ACQ Method  | MMI_ESI_Positive.m | Comment                |         | Acquired Time   | 4/23/2025 6:30:24 PM (UTC-05:00)        |

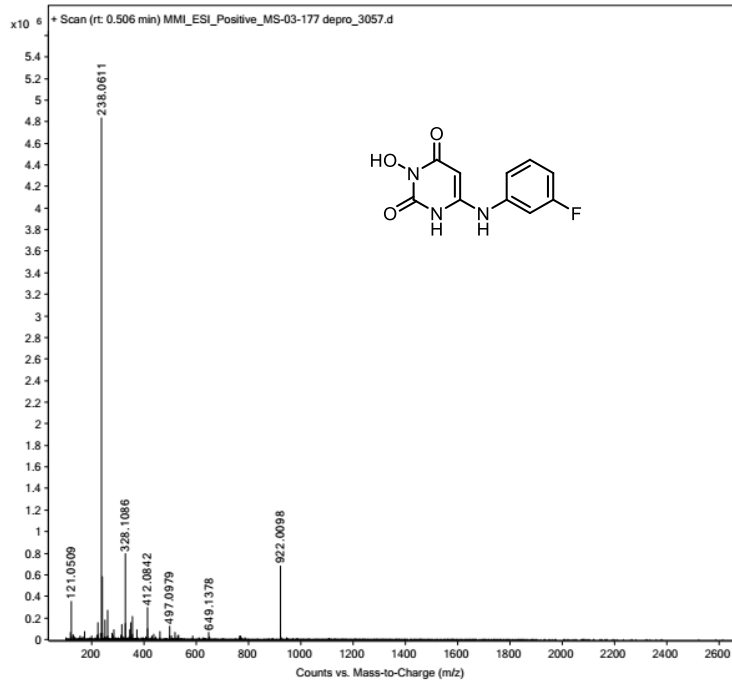

# $^1\text{H}$ NMR and $^{13}\text{C}$ NMR for Compound 2h in $\text{DMSO-}d_6$

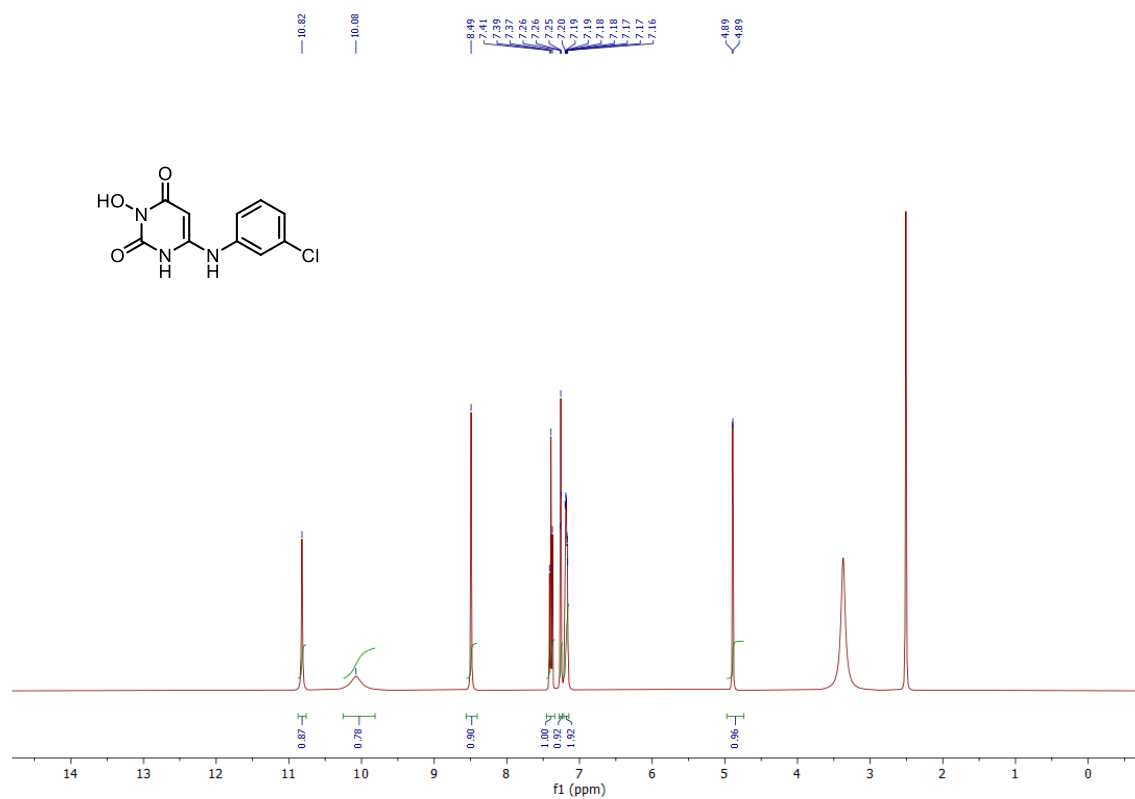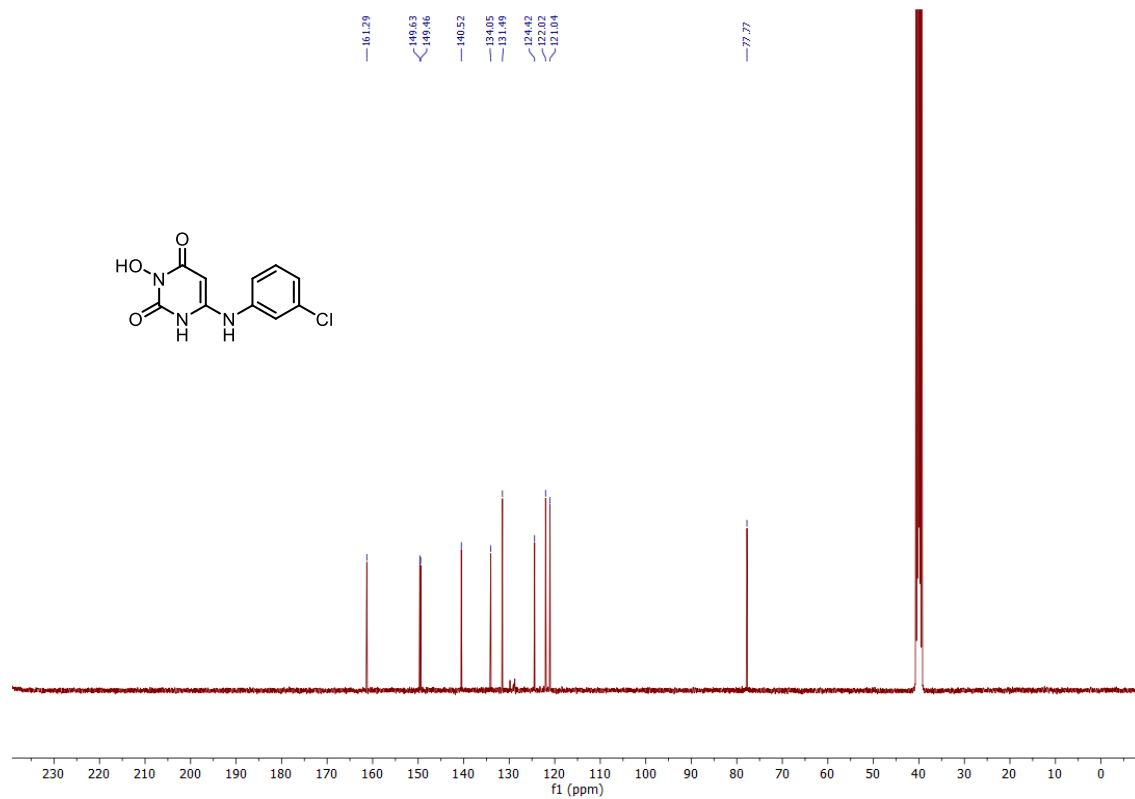

# HRMS and HPLC Trace for Compound 2h

|                    |                    |                               |         |                        |                                         |
|--------------------|--------------------|-------------------------------|---------|------------------------|-----------------------------------------|
| <b>Sample Name</b> | MS-03-215 depro    | <b>Position</b>               | P2-A9   | <b>Instrument Name</b> | TOF Walk Up                             |
| <b>User Name</b>   | Syafiq             | <b>Inj Vol</b>                | 1       | <b>InjPosition</b>     |                                         |
| <b>Sample Type</b> | Sample             | <b>IRM Calibration Status</b> | Success | <b>Data Filename</b>   | MMI_ESI_Positive_MS-03-215 depro_4414.d |
| <b>ACQ Method</b>  | MMI_ESI_Positive.m | <b>Comment</b>                |         | <b>Acquired Time</b>   | 6/2/2025 3:45:00 PM (UTC-05:00)         |

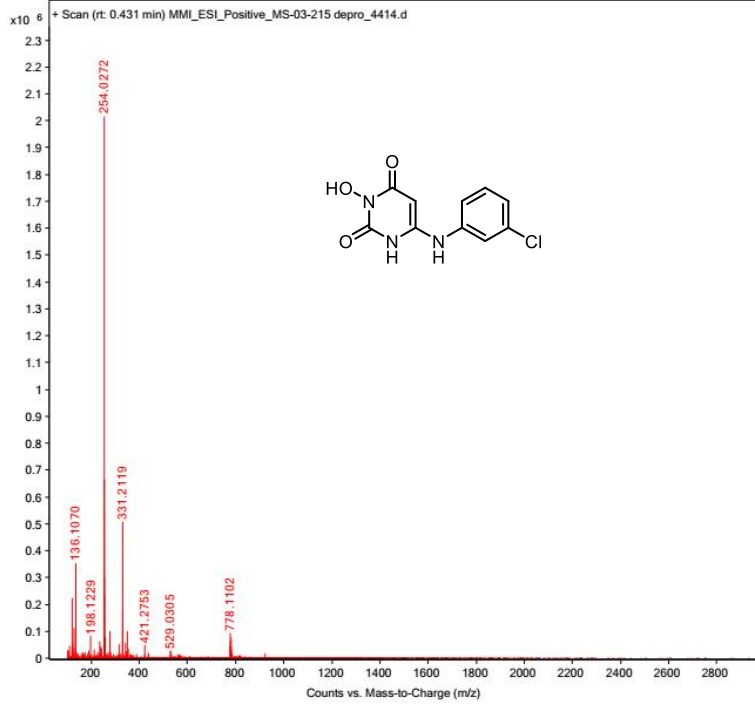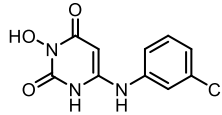

Sample Info : MS-03-215(1)

Additional Info : Peak(s) manually integrated

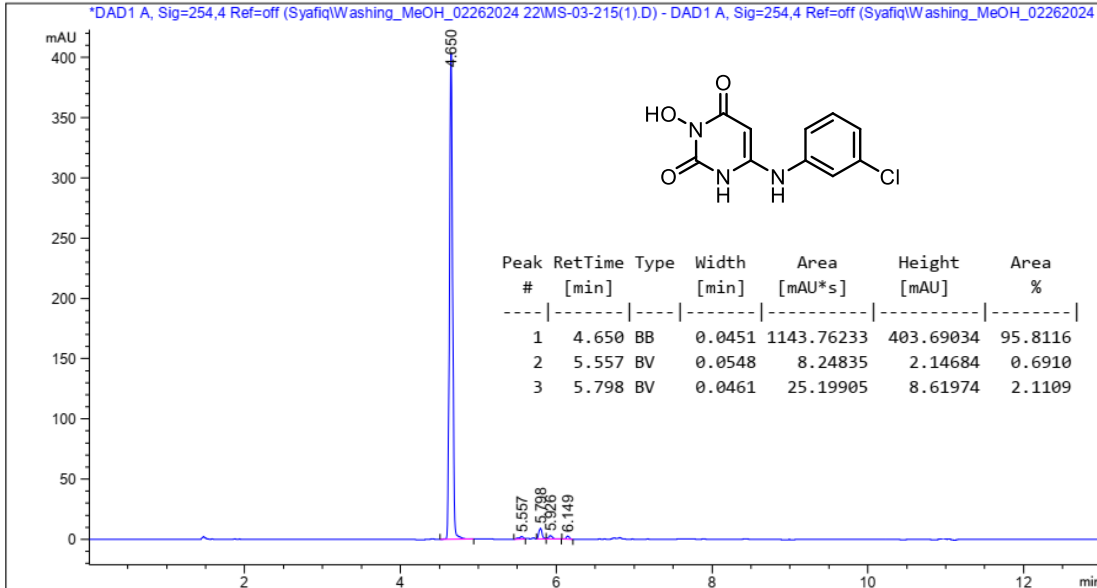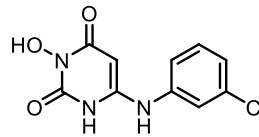

| Peak # | RetTime [min] | Type | Width [min] | Area [mAU*s] | Height [mAU] | Area %  |
|--------|---------------|------|-------------|--------------|--------------|---------|
| 1      | 4.650         | BB   | 0.0451      | 1143.76233   | 403.69034    | 95.8116 |
| 2      | 5.557         | BV   | 0.0548      | 8.24835      | 2.14684      | 0.6910  |
| 3      | 5.798         | BV   | 0.0461      | 25.19905     | 8.61974      | 2.1109  |

# $^1\text{H}$ NMR and $^{13}\text{C}$ NMR for Compound 2i in $\text{DMSO-}d_6$

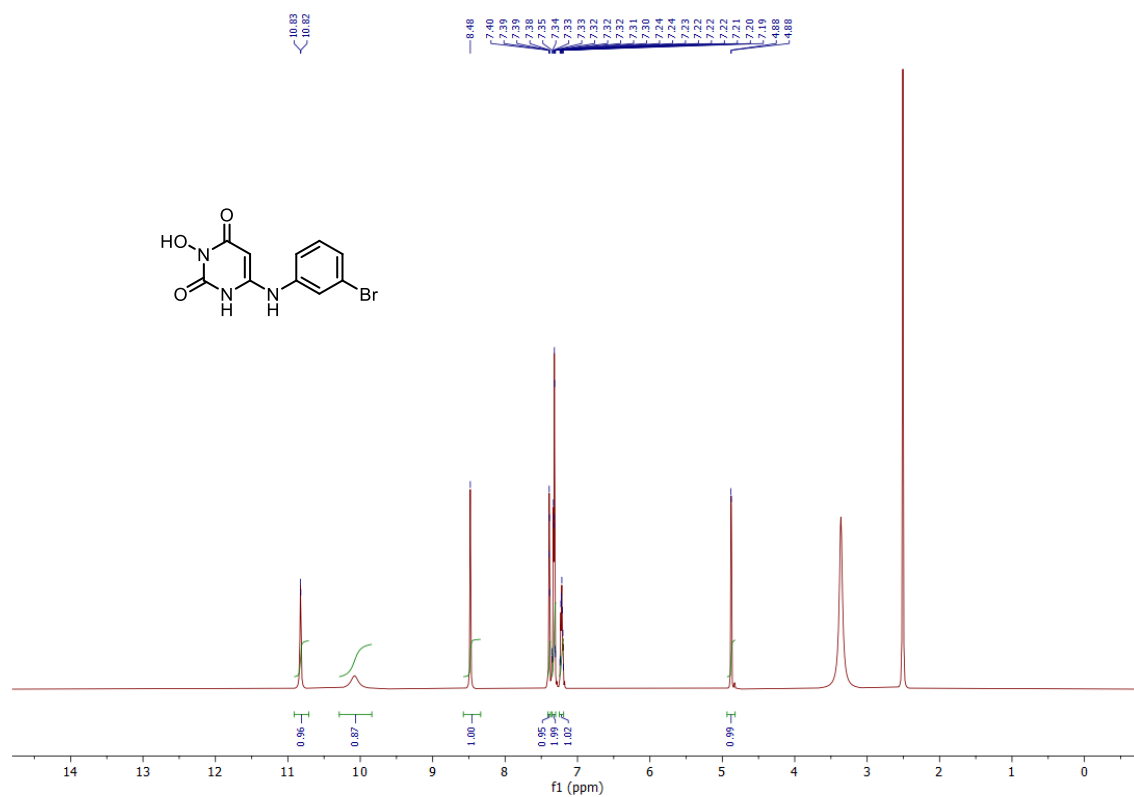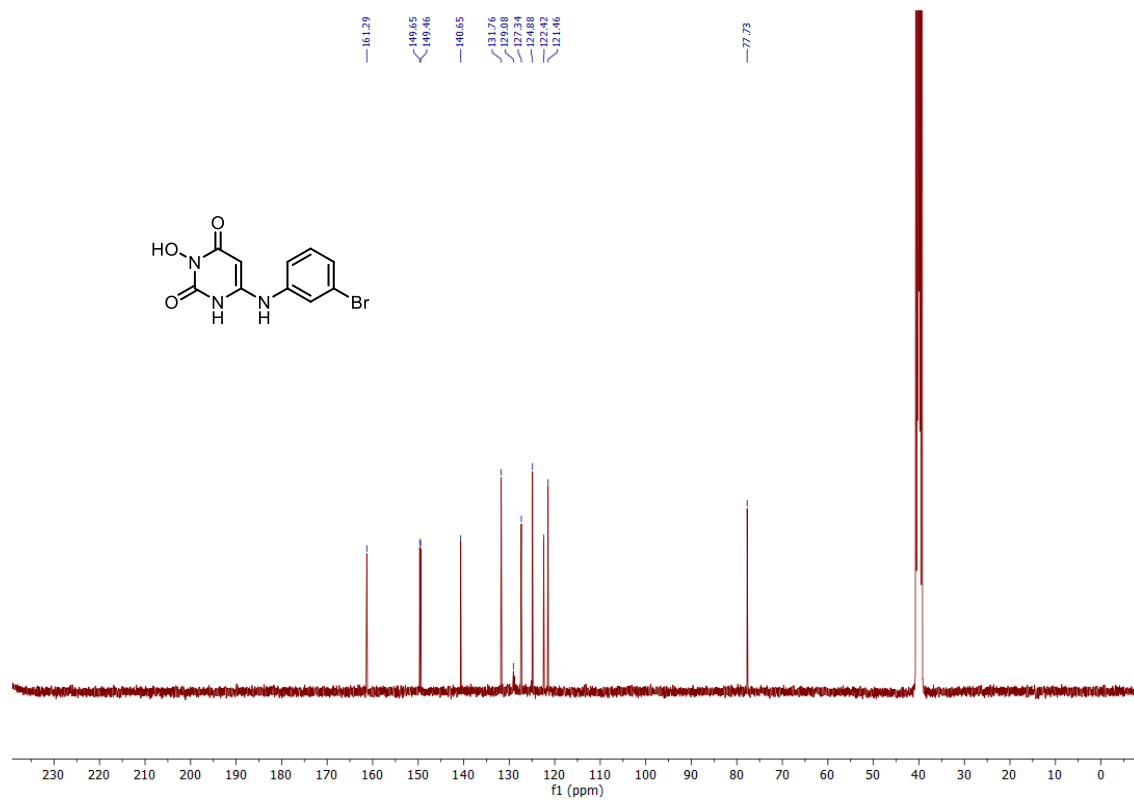

# HRMS for Compound 2i

|                    |                    |                               |         |                        |                                          |
|--------------------|--------------------|-------------------------------|---------|------------------------|------------------------------------------|
| <b>Sample Name</b> | MS-03-227 depro 2  | <b>Position</b>               | P1-C7   | <b>Instrument Name</b> | TOF Walk Up                              |
| <b>User Name</b>   | Syafiq             | <b>Inj Vol</b>                | 1       | <b>InjPosition</b>     |                                          |
| <b>Sample Type</b> | Sample             | <b>IRM Calibration Status</b> | Success | <b>Data Filename</b>   | MMI_ESI_Negative_MS-03-227 depro 2_3440. |
| <b>ACQ Method</b>  | MMI_ESI_Negative.m | <b>Comment</b>                |         | <b>Acquired Time</b>   | 5/7/2025 5:03:38 PM (UTC-05:00)          |

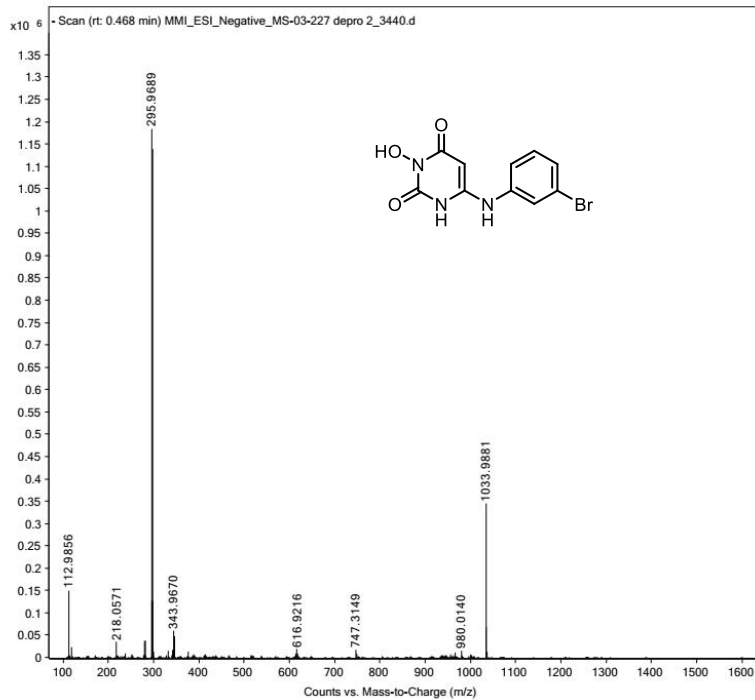

# <sup>1</sup>H NMR and <sup>13</sup>C NMR for Compound 2j in DMSO-d<sub>6</sub>

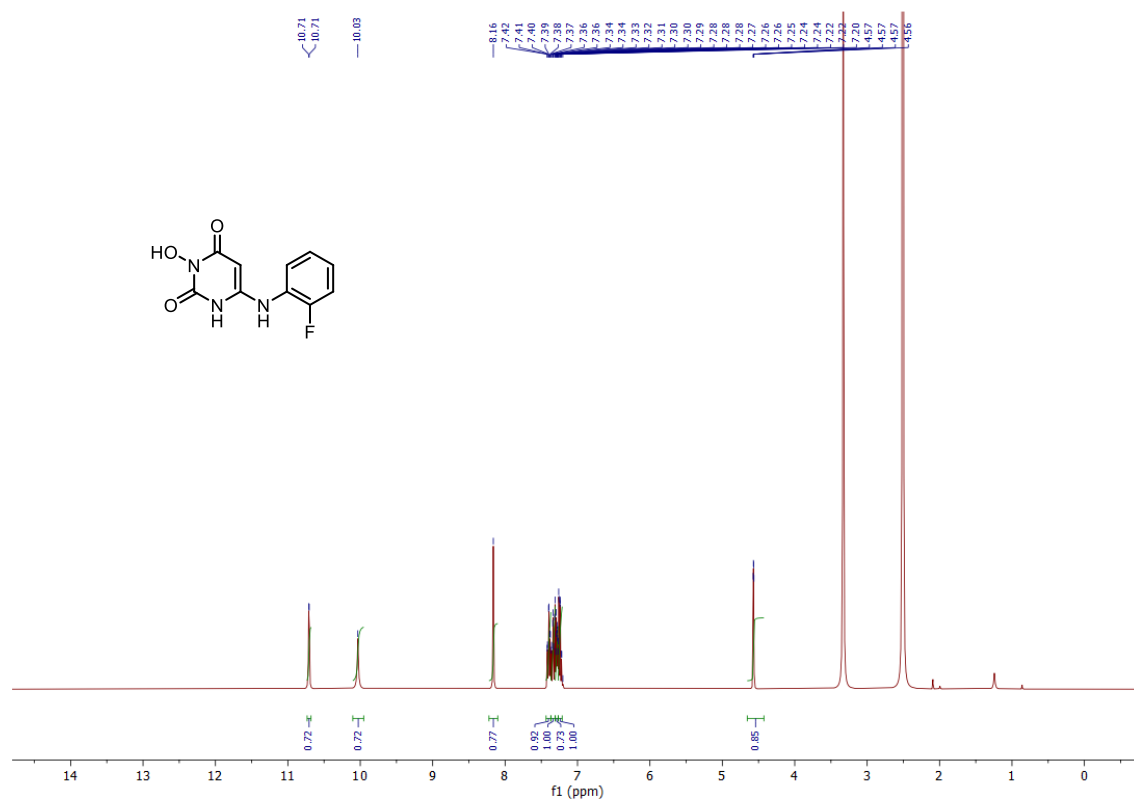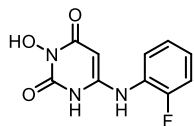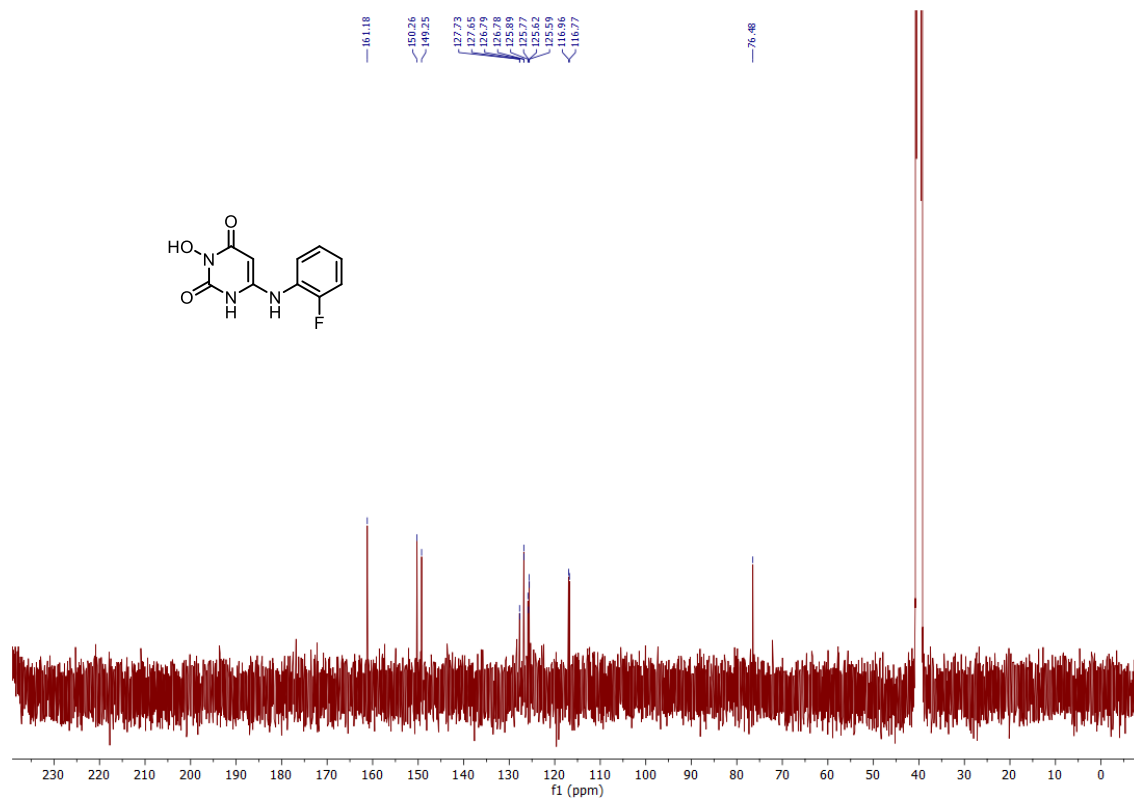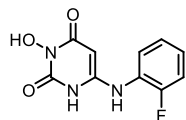

# HRMS for Compound 2j

|             |                    |                        |         |                 |                                   |
|-------------|--------------------|------------------------|---------|-----------------|-----------------------------------|
| Sample Name | MS-03-179          | Position               | P2-A3   | Instrument Name | TOF Walk Up                       |
| User Name   | Syafiq             | Inj Vol                | 1       | InjPosition     |                                   |
| Sample Type | Sample             | IRM Calibration Status | Success | Data Filename   | MMI_ESI_Positive_MS-03-179_5626.d |
| ACQ Method  | MMI_ESI_Positive.m | Comment                |         | Acquired Time   | 7/2/2025 2:15:28 PM (UTC-05:00)   |

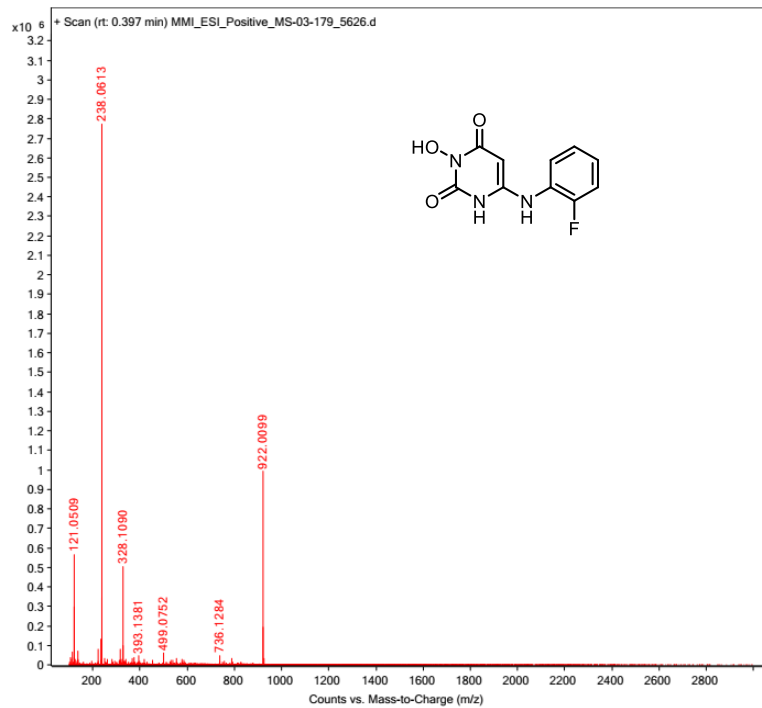

# $^1\text{H}$ NMR and $^{13}\text{C}$ NMR for Compound 2k in $\text{DMSO-}d_6$

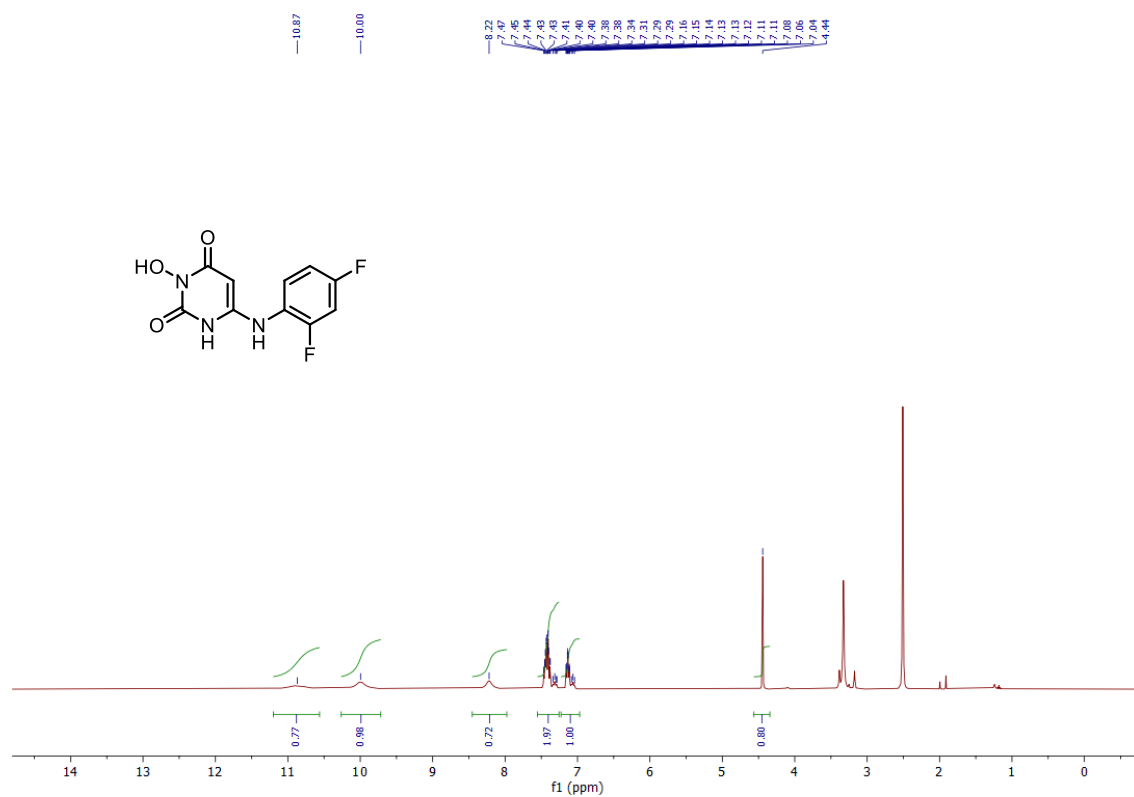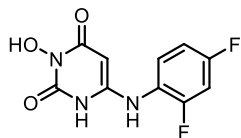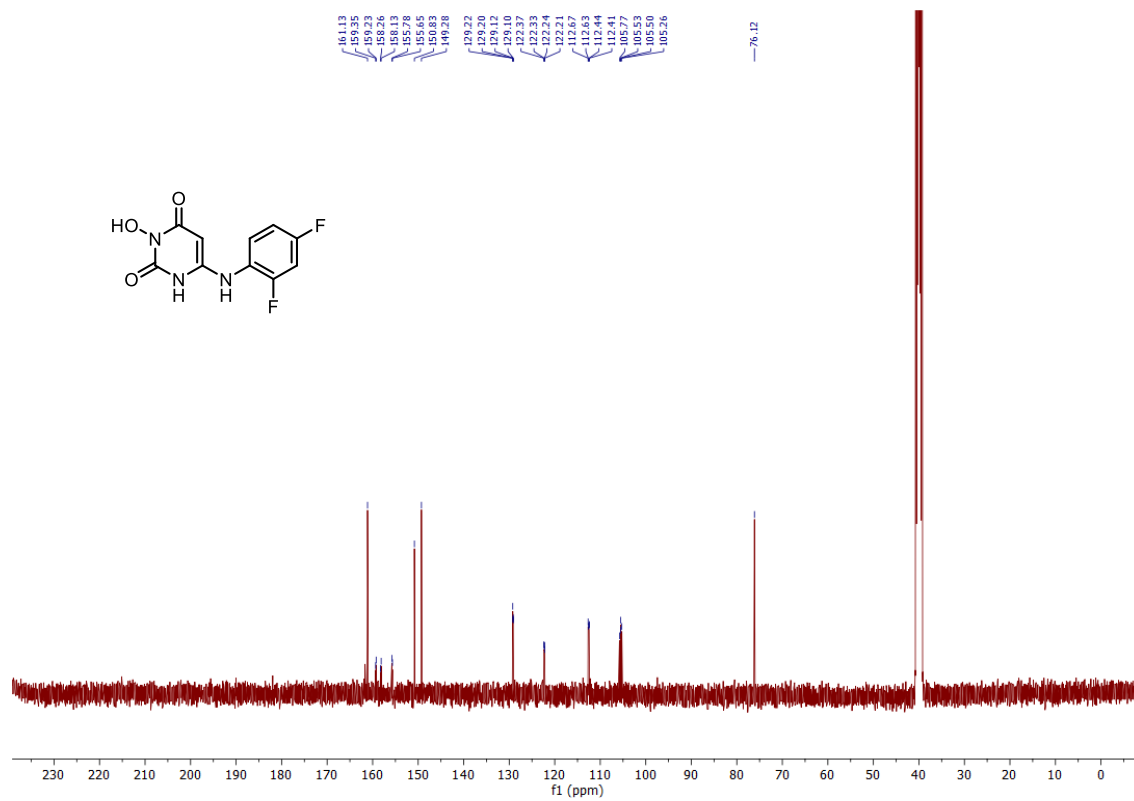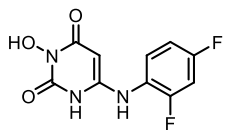

# HRMS for Compound 2k

|             |                    |                        |         |                 |                                        |
|-------------|--------------------|------------------------|---------|-----------------|----------------------------------------|
| Sample Name | MS-03-175depro     | Position               | P2-B8   | Instrument Name | TOF Walk Up                            |
| User Name   | Syafiq             | Inj Vol                | 1       | InjPosition     |                                        |
| Sample Type | Sample             | IRM Calibration Status | Success | Data Filename   | MMI_ESI_Positive_MS-03-175depro_1890.d |
| ACQ Method  | MMI_ESI_Positive.m | Comment                |         | Acquired Time   | 3/7/2025 9:38:16 AM (UTC-06:00)        |

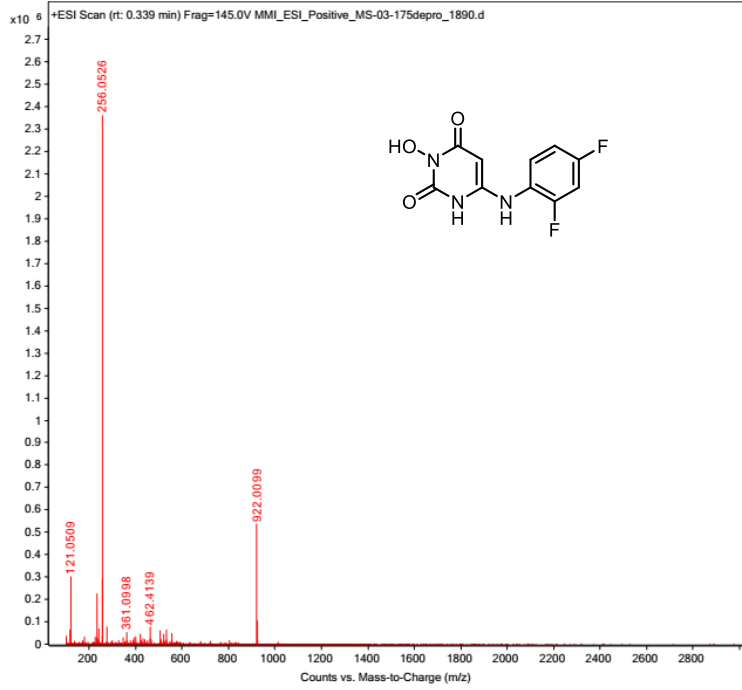

# <sup>1</sup>H NMR and <sup>13</sup>C NMR for Compound 2l in DMSO-d<sub>6</sub>

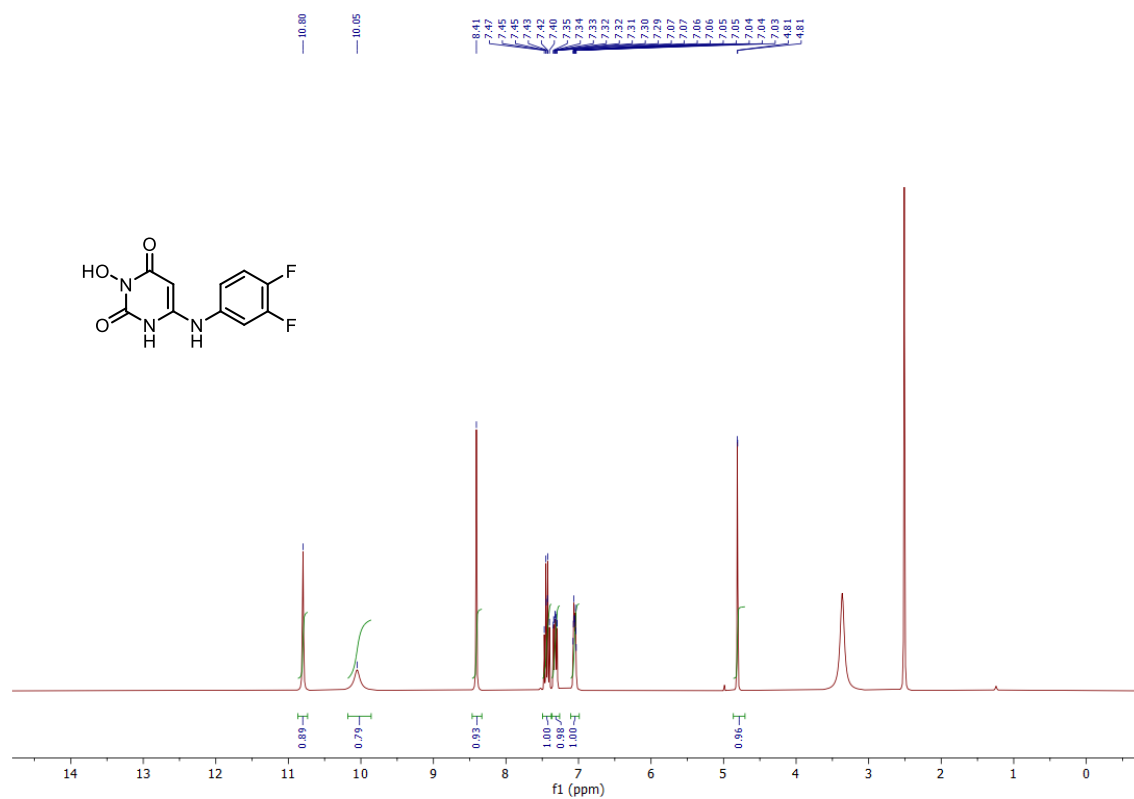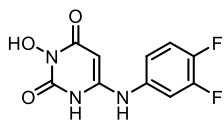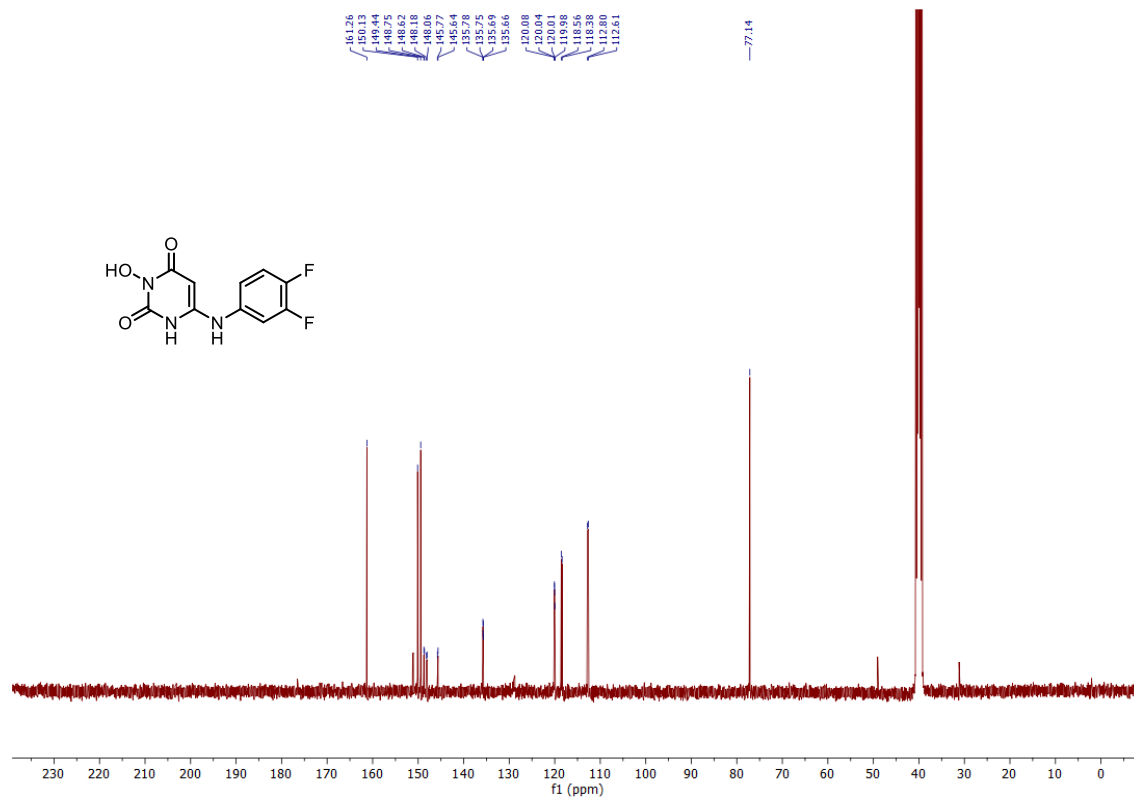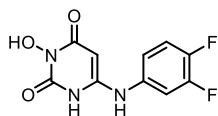

# HRMS and HPLC Trace for Compound 21

|                    |                    |                               |         |                        |                                         |
|--------------------|--------------------|-------------------------------|---------|------------------------|-----------------------------------------|
| <b>Sample Name</b> | MS-03-173 depro    | <b>Position</b>               | P2-F7   | <b>Instrument Name</b> | TOF Walk Up                             |
| <b>User Name</b>   | Syafiq             | <b>Inj Vol</b>                | 1       | <b>InjPosition</b>     |                                         |
| <b>Sample Type</b> | Sample             | <b>IRM Calibration Status</b> | Success | <b>Data Filename</b>   | MMI_ESI_Positive_MS-03-173 depro_4551.d |
| <b>ACQ Method</b>  | MMI_ESI_Positive_m | <b>Comment</b>                |         | <b>Acquired Time</b>   | 6/4/2025 5:34:58 PM (UTC-05:00)         |

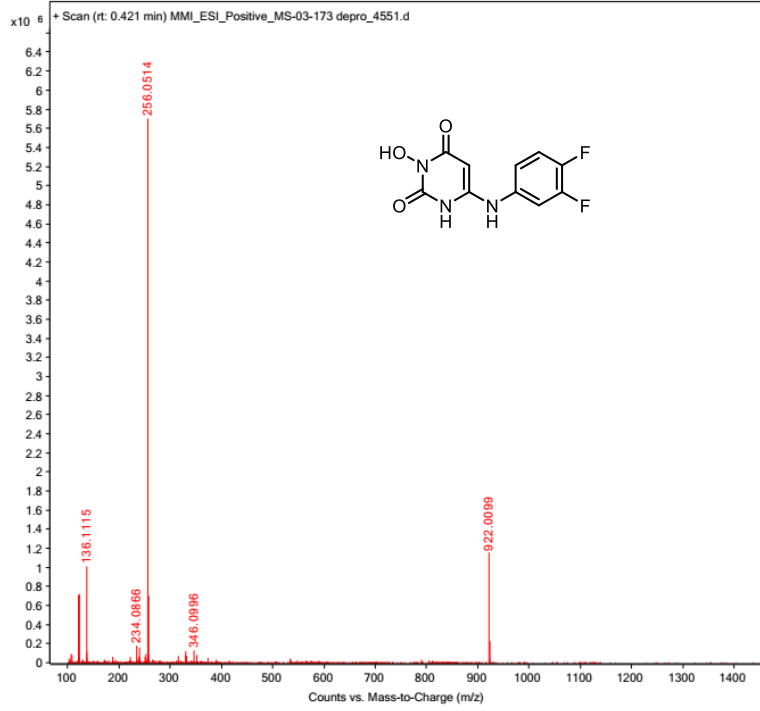

Sample Info : MS-03-173(1)

Additional Info : Peak(s) manually integrated

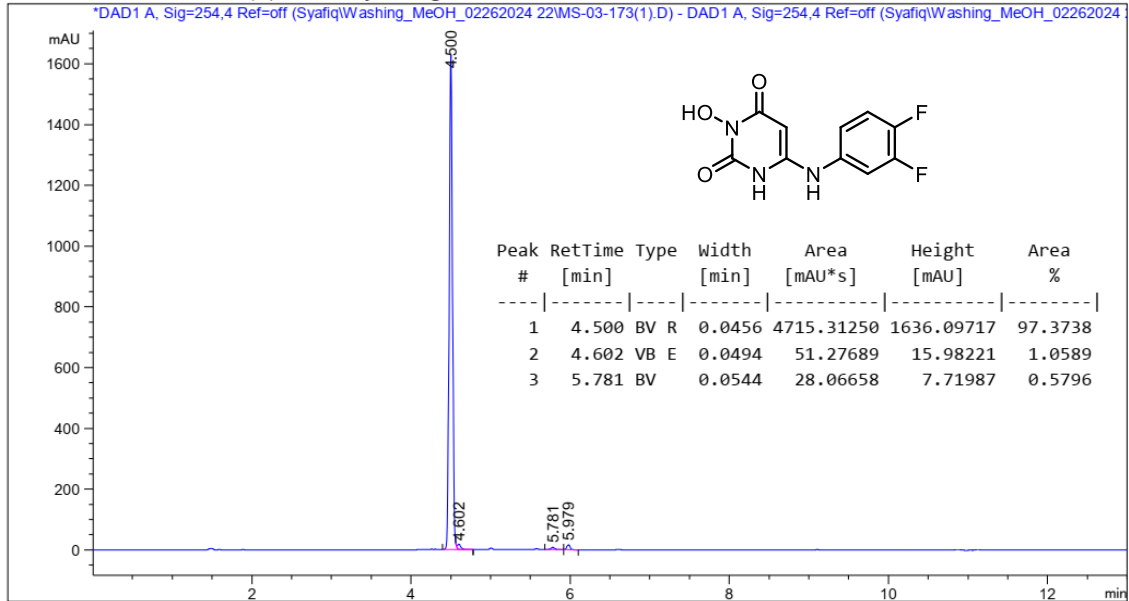

# $^1\text{H}$ NMR and $^{13}\text{C}$ NMR for Compound 2m in $\text{DMSO-}d_6$

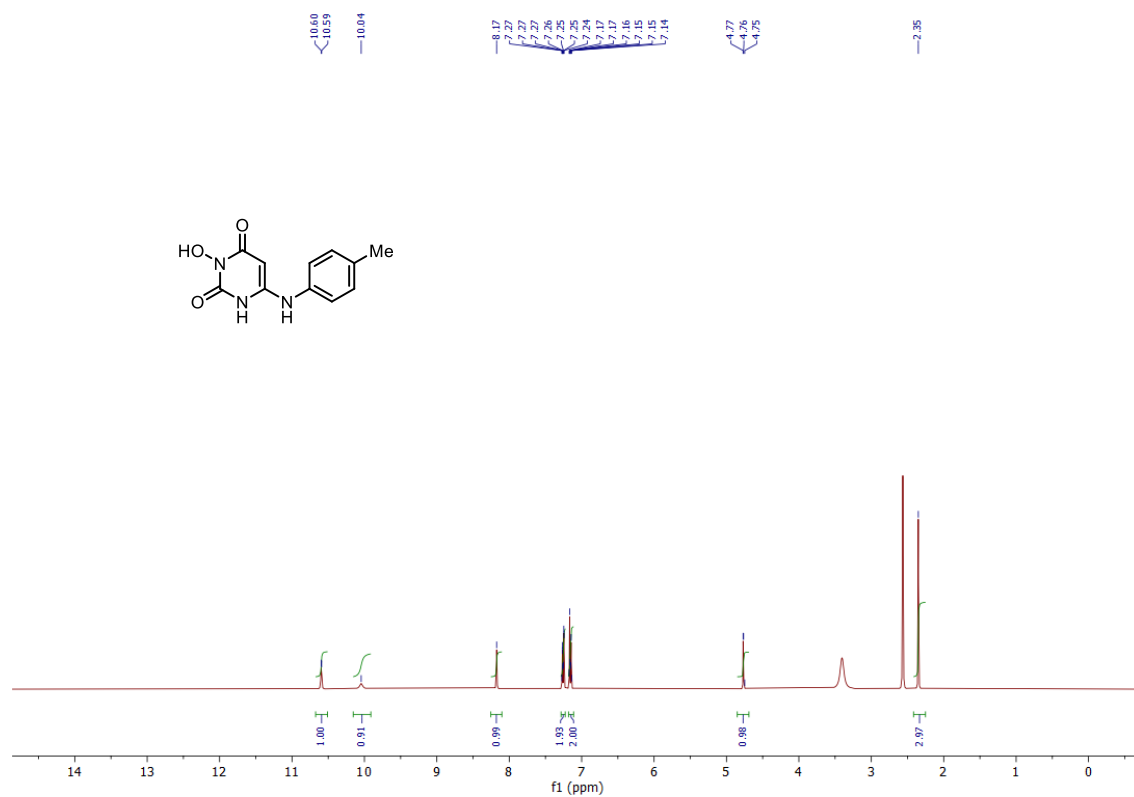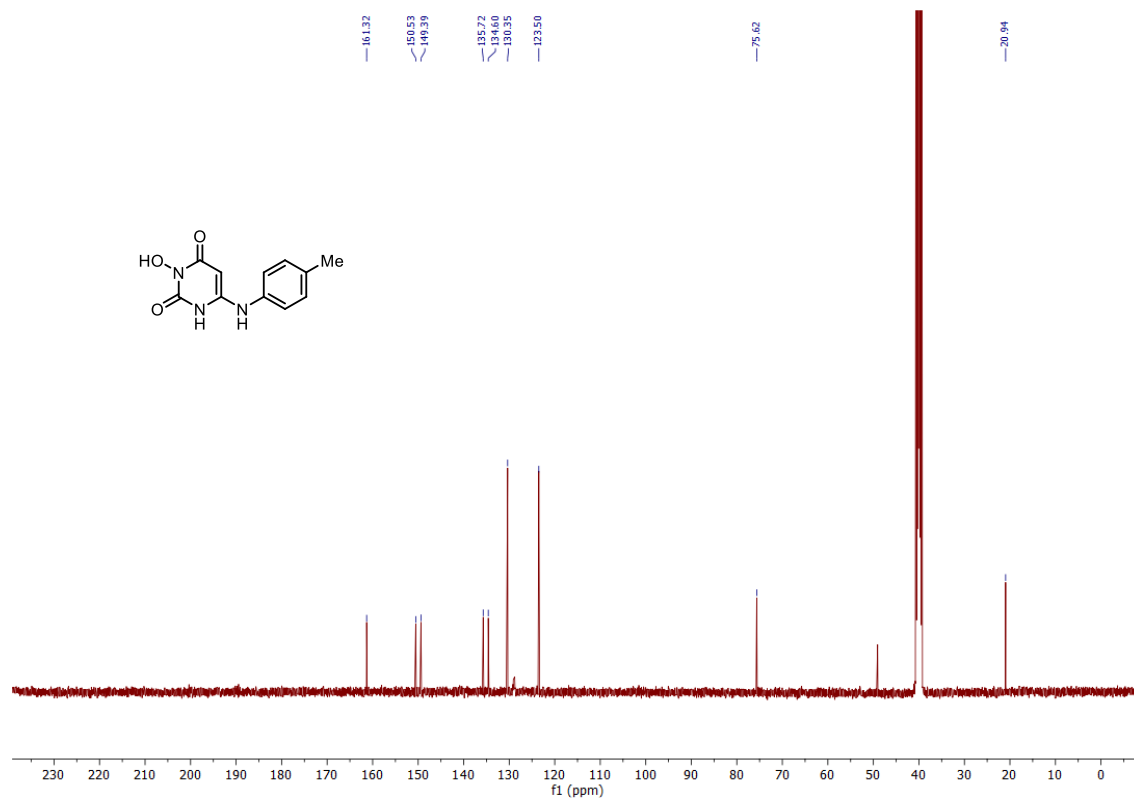

# HRMS for Compound 2m

|                    |                    |                               |         |                        |                                         |
|--------------------|--------------------|-------------------------------|---------|------------------------|-----------------------------------------|
| <b>Sample Name</b> | MS-03-225 depro    | <b>Position</b>               | P1-F4   | <b>Instrument Name</b> | TOF Walk Up                             |
| <b>User Name</b>   | Syafiq             | <b>Inj Vol</b>                | 1       | <b>InjPosition</b>     |                                         |
| <b>Sample Type</b> | Sample             | <b>IRM Calibration Status</b> | Success | <b>Data Filename</b>   | MMI_ESI_Positive_MS-03-225 depro_4732.d |
| <b>ACQ Method</b>  | MMI_ESI_Positive.m | <b>Comment</b>                |         | <b>Acquired Time</b>   | 6/10/2025 4:51:10 PM (UTC-05:00)        |

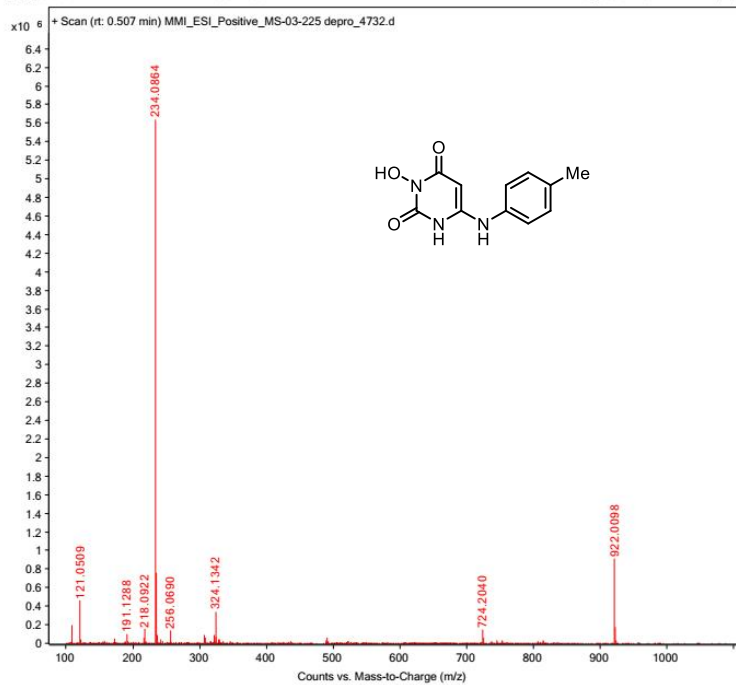

# $^1\text{H}$ NMR and $^{13}\text{C}$ NMR for Compound 2n in $\text{DMSO-}d_6$

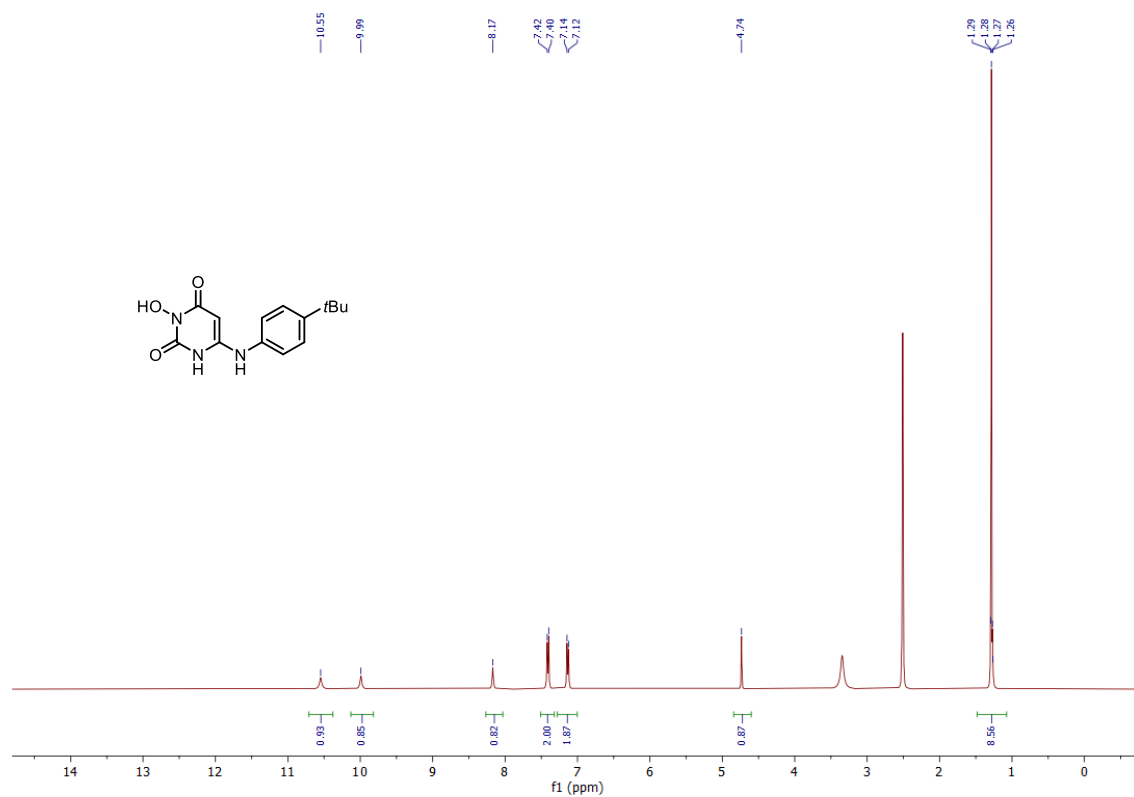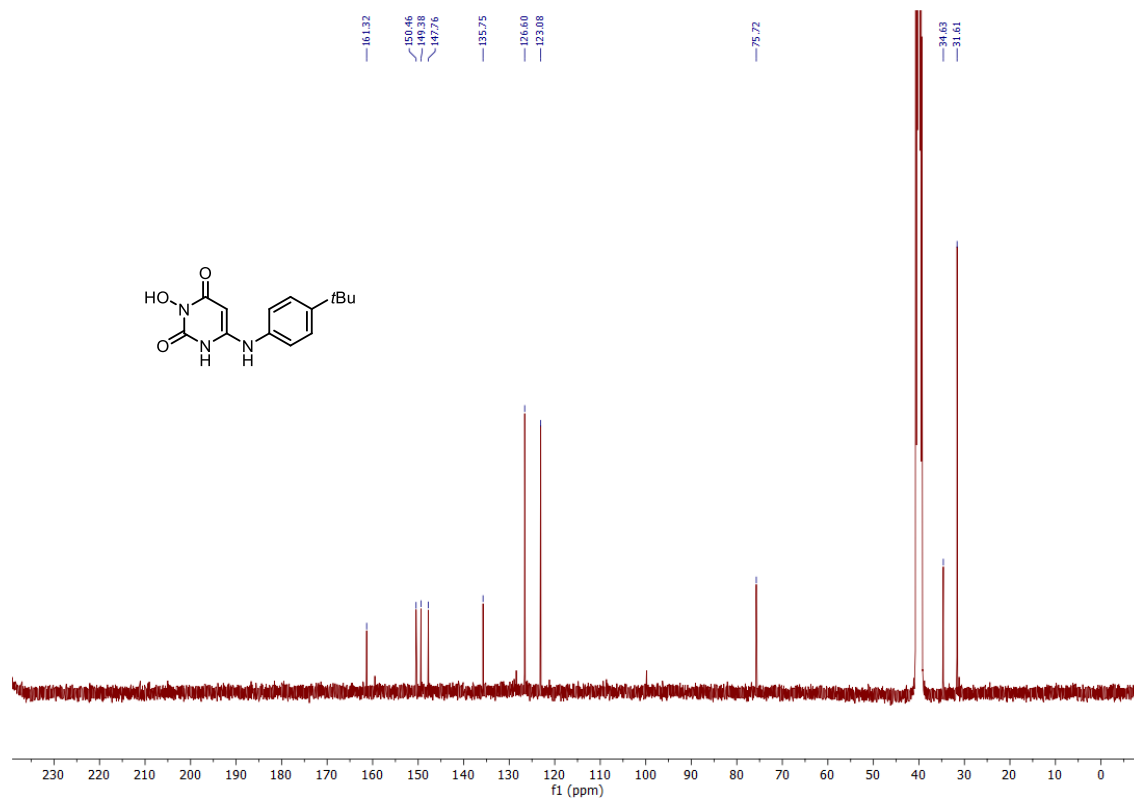

# HRMS for Compound 2n

|                    |                    |                               |         |                        |                                         |
|--------------------|--------------------|-------------------------------|---------|------------------------|-----------------------------------------|
| <b>Sample Name</b> | MS-04-105 depro    | <b>Position</b>               | P2-E10  | <b>Instrument Name</b> | TOF Walk Up                             |
| <b>User Name</b>   | Syafiq             | <b>Inj Vol</b>                | 1       | <b>InjPosition</b>     |                                         |
| <b>Sample Type</b> | Sample             | <b>IRM Calibration Status</b> | Success | <b>Data Filename</b>   | MMI_ESI_Positive_MS-04-105 depro_9884.d |
| <b>ACQ Method</b>  | MMI_ESI_Positive.m | <b>Comment</b>                |         | <b>Acquired Time</b>   | 11/12/2025 7:15:49 PM (UTC-06:00)       |

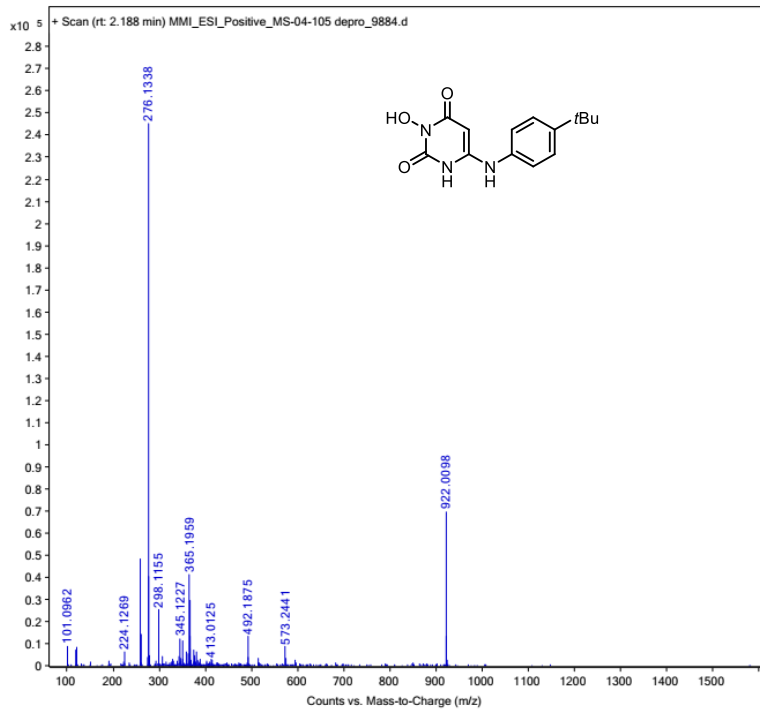

# $^1\text{H}$ NMR and $^{13}\text{C}$ NMR for Compound 2o in $\text{DMSO-}d_6$

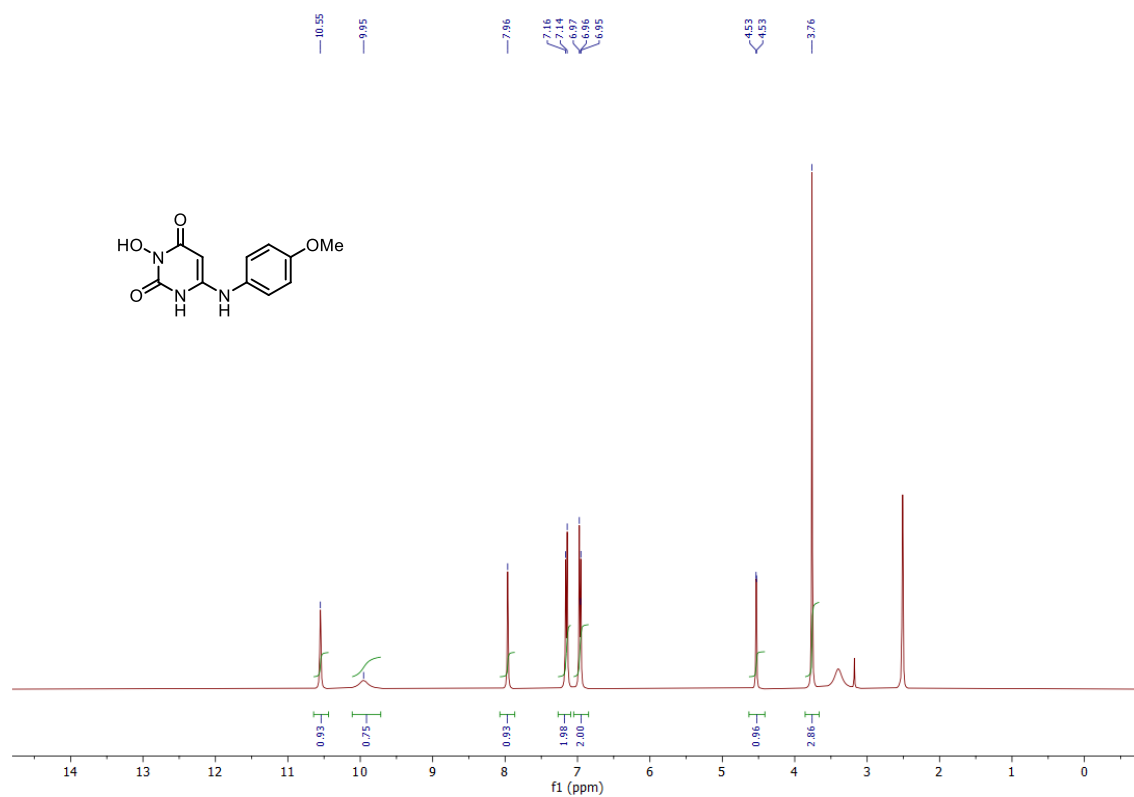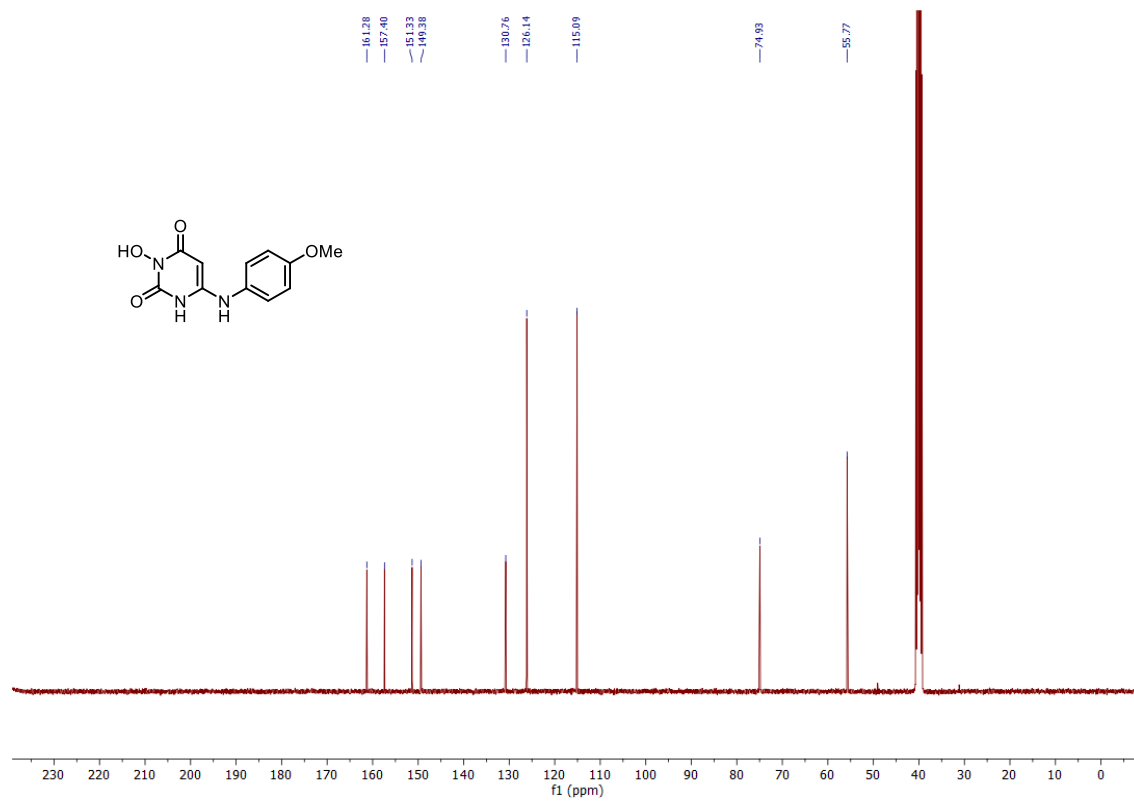

# HRMS for Compound 2o

|             |                    |                        |         |                 |                                        |
|-------------|--------------------|------------------------|---------|-----------------|----------------------------------------|
| Sample Name | MS-03-165depro     | Position               | P2-E1   | Instrument Name | TOF Walk Up                            |
| User Name   | Syafiq             | Inj Vol                | 1       | InjPosition     |                                        |
| Sample Type | Sample             | IRM Calibration Status | Success | Data Filename   | MMI_ESI_Positive_MS-03-165depro_1361.d |
| ACQ Method  | MMI_ESI_Positive.m | Comment                |         | Acquired Time   | 2/13/2025 11:13:21 AM (UTC-06:00)      |

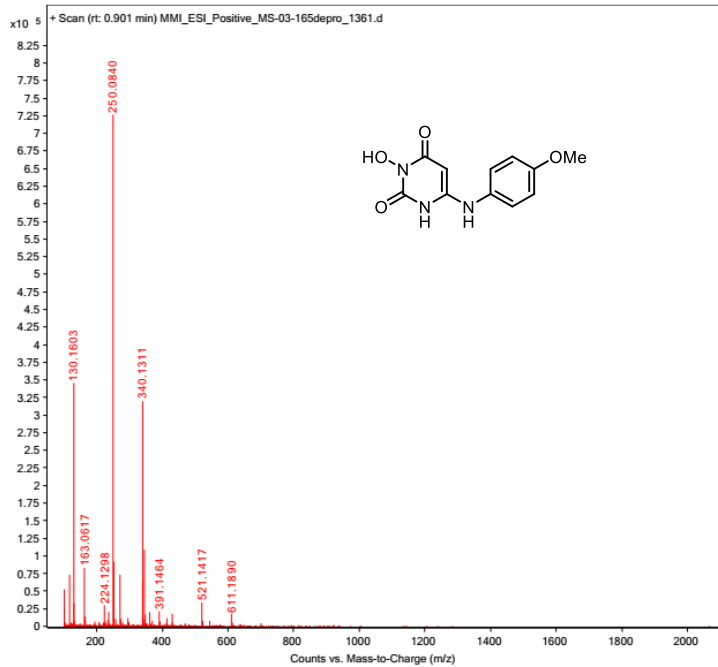

# $^1\text{H}$ NMR and $^{13}\text{C}$ NMR for Compound 2p in $\text{DMSO-}d_6$

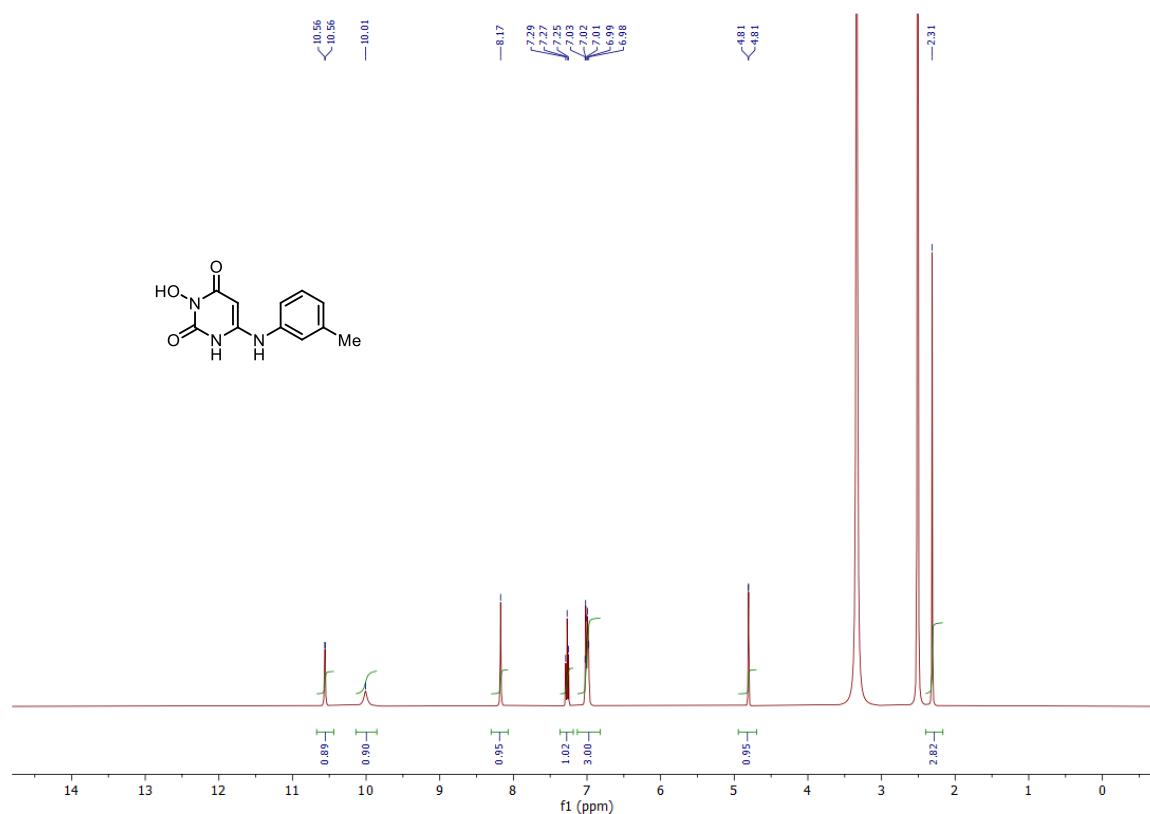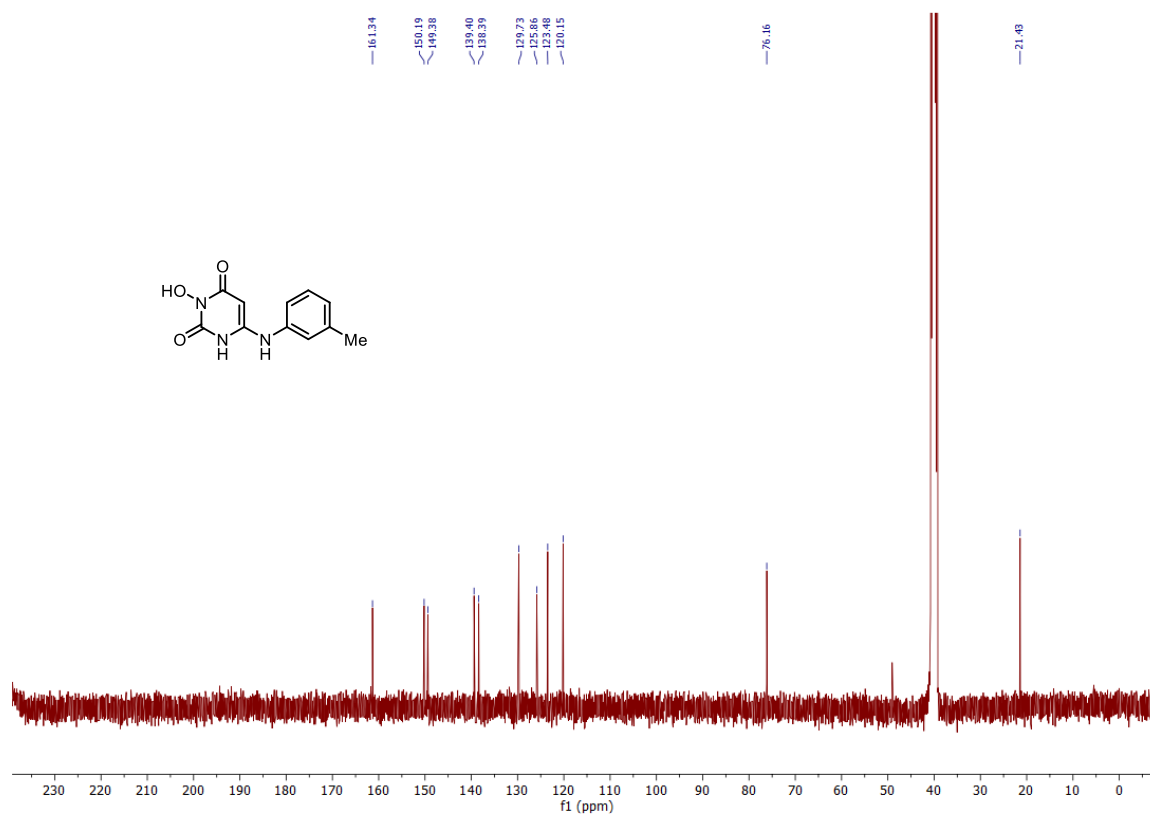

# HRMS for Compound 2p

|                    |                    |                               |         |                        |                                         |
|--------------------|--------------------|-------------------------------|---------|------------------------|-----------------------------------------|
| <b>Sample Name</b> | MS-03-239 depro    | <b>Position</b>               | P2-B10  | <b>Instrument Name</b> | TOF Walk Up                             |
| <b>User Name</b>   | Syafiq             | <b>Inj Vol</b>                | 1       | <b>InjPosition</b>     |                                         |
| <b>Sample Type</b> | Sample             | <b>IRM Calibration Status</b> | Success | <b>Data Filename</b>   | MMI_ESI_Negative_MS-03-239 depro_6380.d |
| <b>ACQ Method</b>  | MMI_ESI_Negative.m | <b>Comment</b>                |         | <b>Acquired Time</b>   | 7/23/2025 5:42:29 PM (UTC-05:00)        |

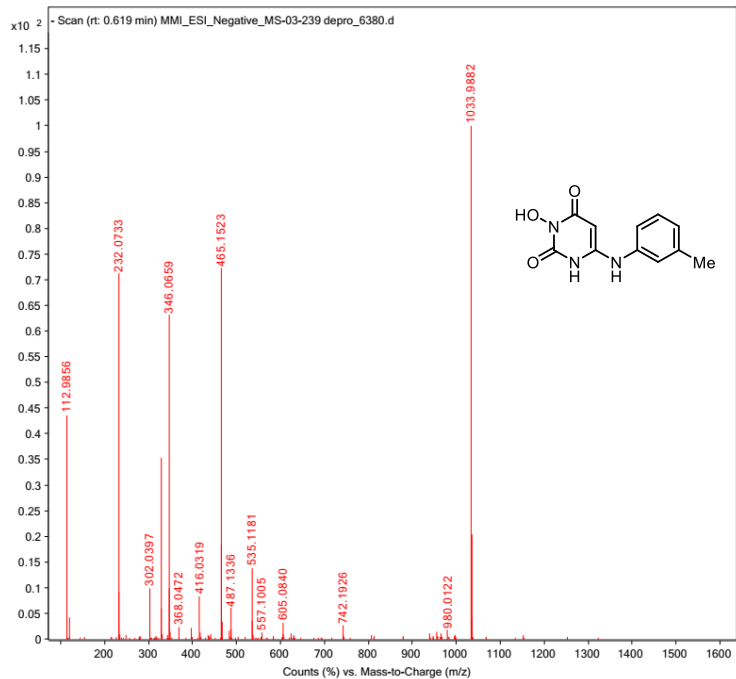

# $^1\text{H}$ NMR and $^{13}\text{C}$ NMR for Compound 2q in $\text{DMSO-}d_6$

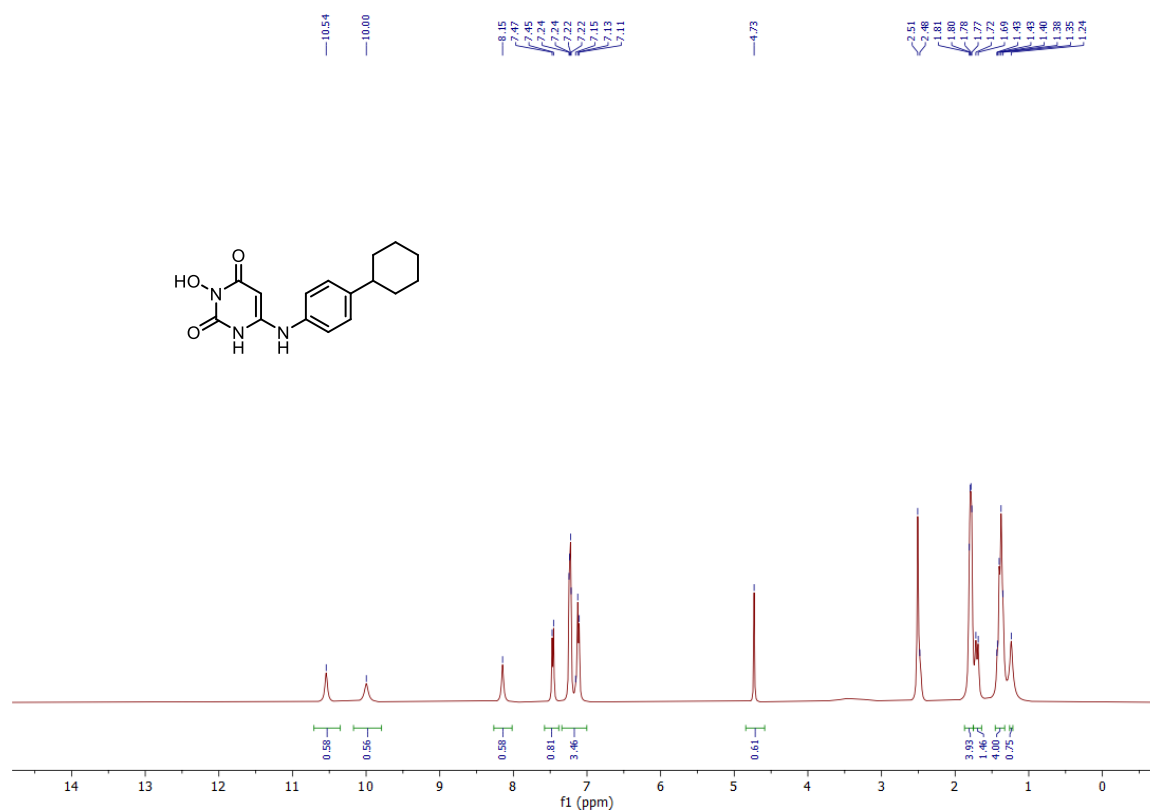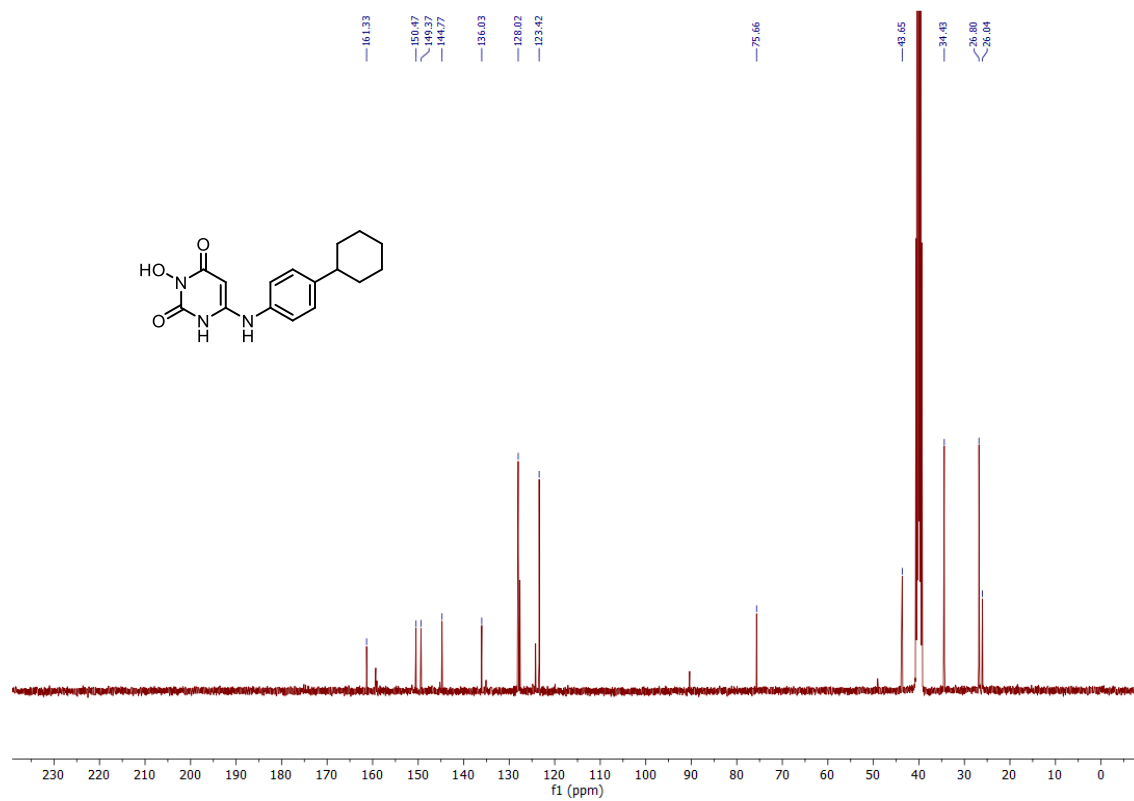

# HRMS for Compound 2q

|             |                    |                        |         |                 |                                          |
|-------------|--------------------|------------------------|---------|-----------------|------------------------------------------|
| Sample Name | MS-04-11 depro-18  | Position               | P2-A7   | Instrument Name | TOF Walk Up                              |
| User Name   | Syafiq             | Inj Vol                | 1       | InjPosition     |                                          |
| Sample Type | Sample             | IRM Calibration Status | Success | Data Filename   | MMI_ESI_Positive_MS-04-11 depro-18_0674. |
| ACQ Method  | MMI_ESI_Positive.m | Comment                |         | Acquired Time   | 12/17/2025 3:02:19 PM (UTC-06:00)        |

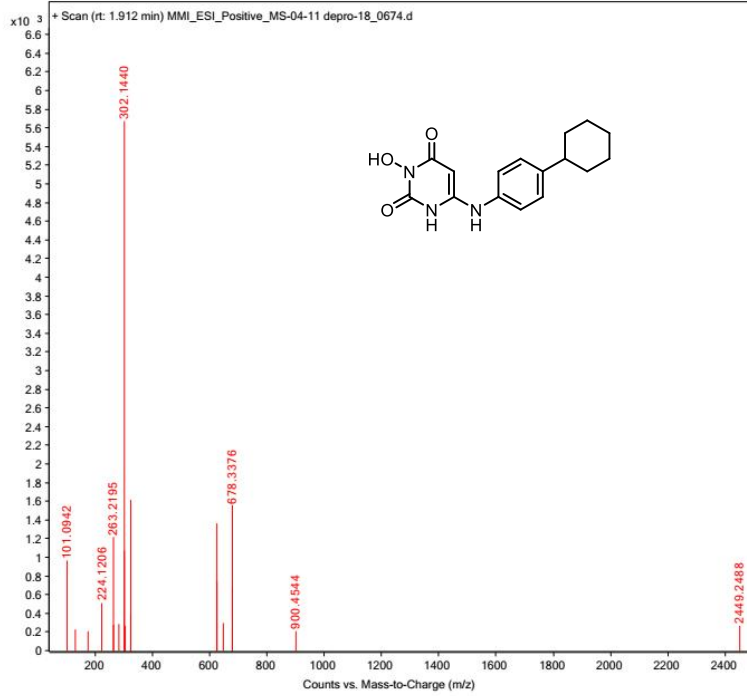

# $^1\text{H}$ NMR and $^{13}\text{C}$ NMR for Compound 2r in $\text{DMSO-}d_6$

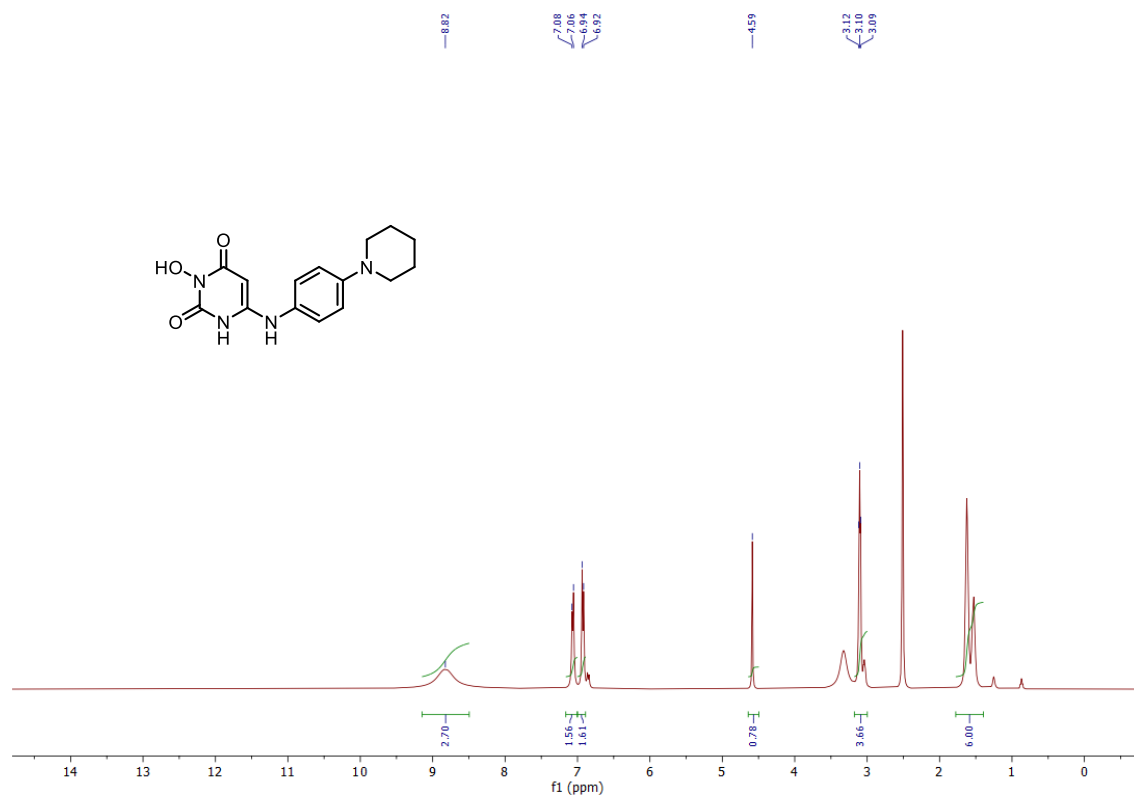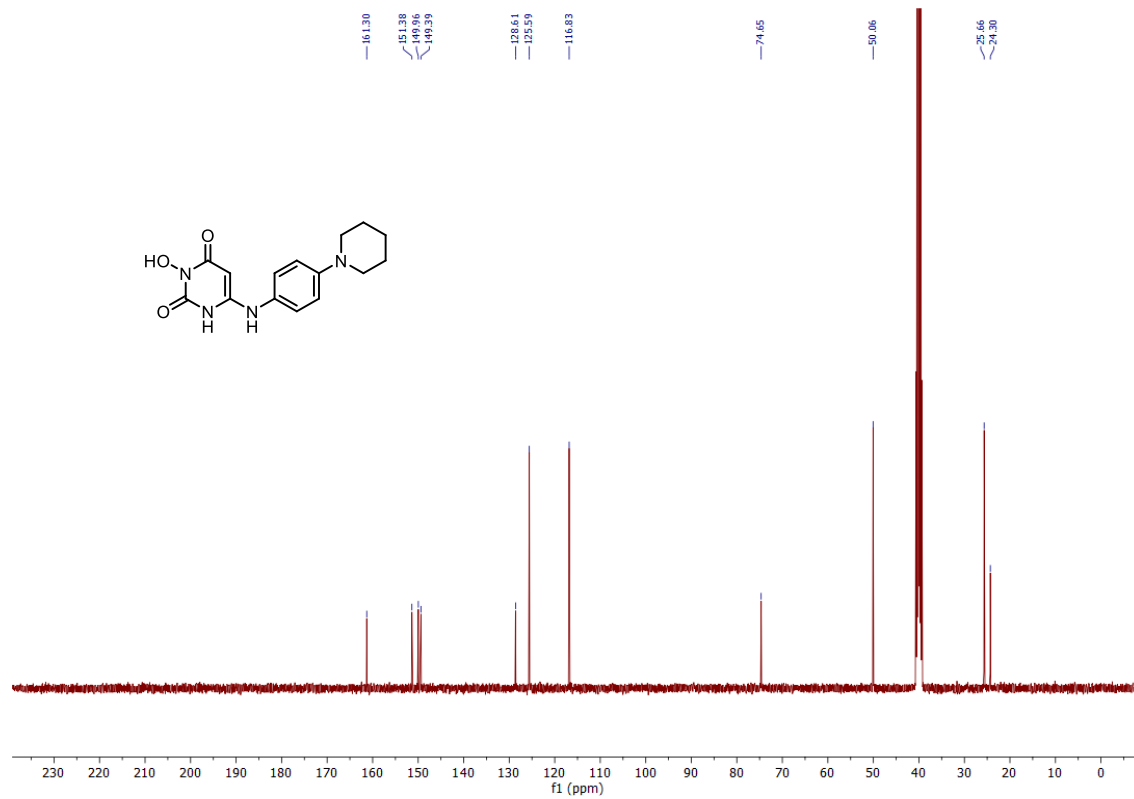

# HRMS for Compound 2r

|             |                    |                        |         |                 |                                   |
|-------------|--------------------|------------------------|---------|-----------------|-----------------------------------|
| Sample Name | MS-03-205          | Position               | P1-F3   | Instrument Name | TOF Walk Up                       |
| User Name   | Syafiq             | Inj Vol                | 1       | InjPosition     |                                   |
| Sample Type | Sample             | IRM Calibration Status | Success | Data Filename   | MMI_ESI_Positive_MS-03-205_2689.d |
| ACQ Method  | MMI_ESI_Positive.m | Comment                |         | Acquired Time   | 4/14/2025 11:09:20 AM (UTC-05:00) |

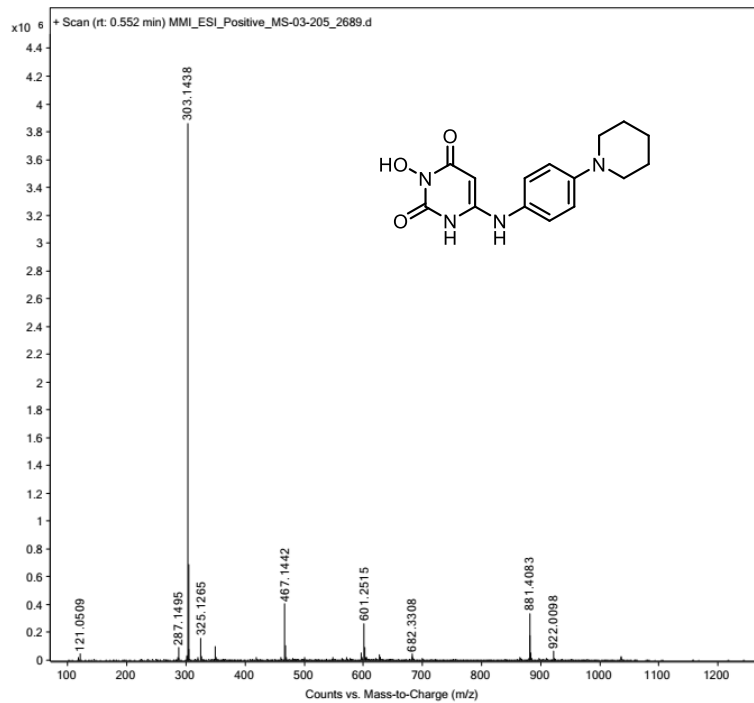

# $^1\text{H}$ NMR and $^{13}\text{C}$ NMR for Compound 2s in $\text{DMSO-}d_6$

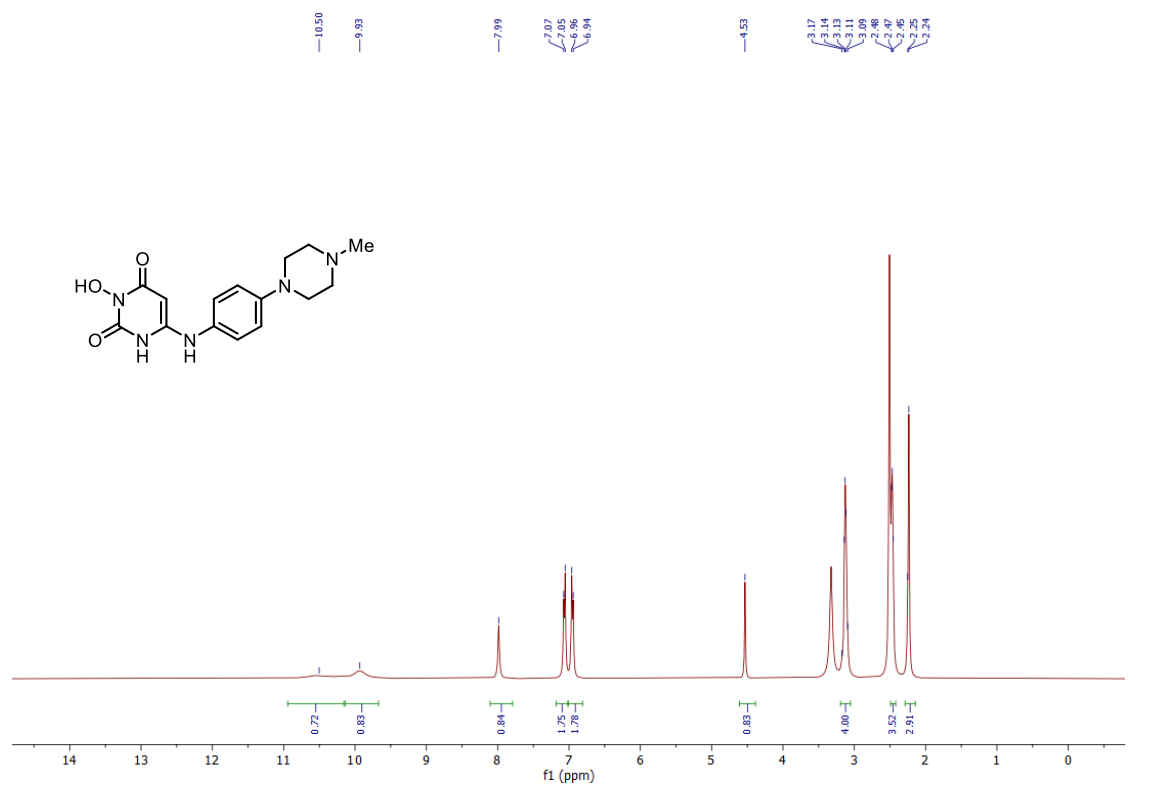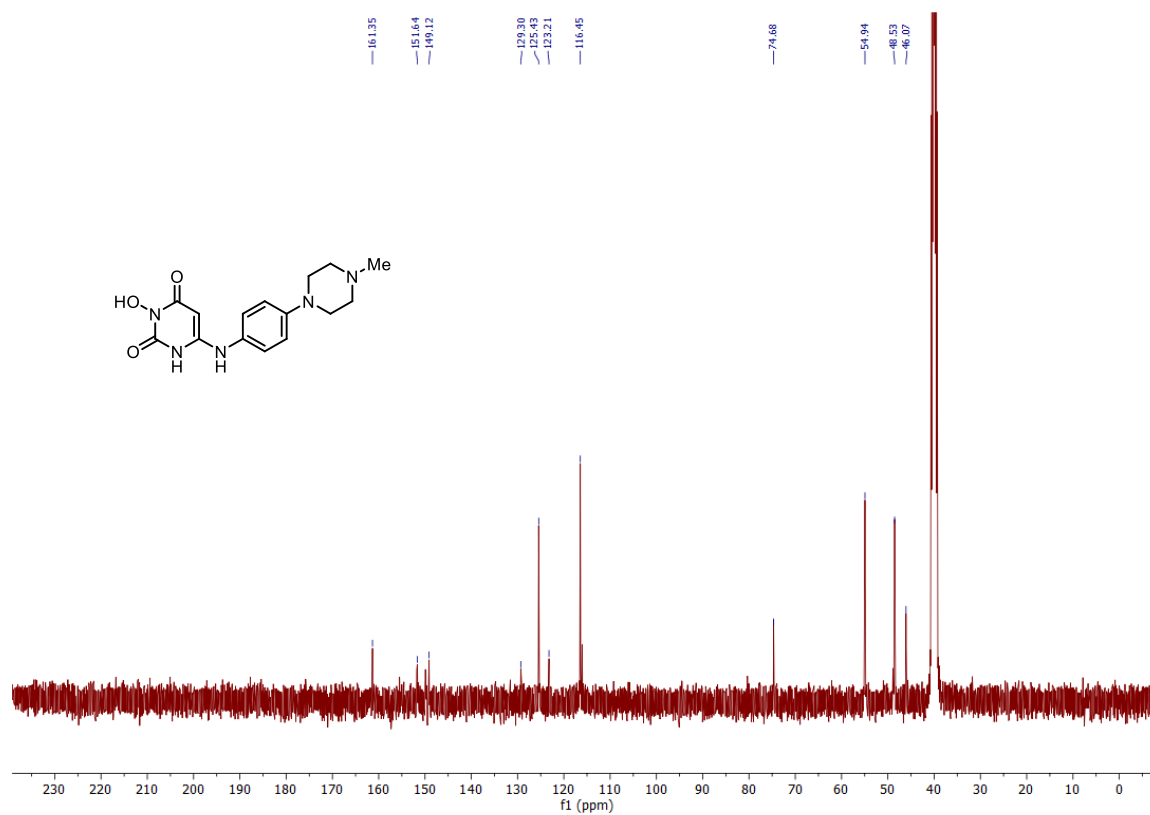

# HRMS for Compound 2s

|             |                    |                        |         |                 |                                         |
|-------------|--------------------|------------------------|---------|-----------------|-----------------------------------------|
| Sample Name | MS-03-207 depro    | Position               | P2-A2   | Instrument Name | TOF Walk Up                             |
| User Name   | Syafiq             | Inj Vol                | 1       | InjPosition     |                                         |
| Sample Type | Sample             | IRM Calibration Status | Success | Data Filename   | MMI_ESI_Positive_MS-03-207 depro_2715.d |
| ACQ Method  | MMI_ESI_Positive.m | Comment                |         | Acquired Time   | 4/14/2025 5:10:03 PM (UTC-05:00)        |

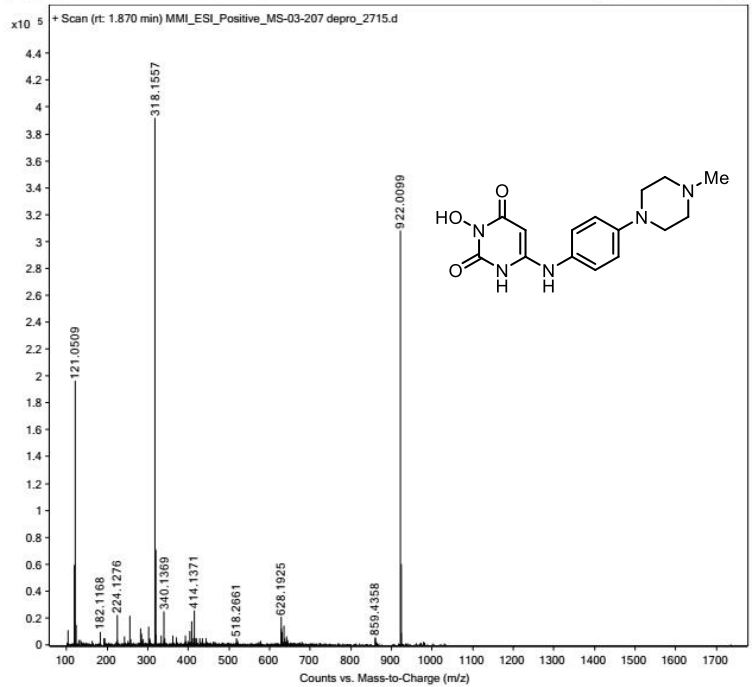

# <sup>1</sup>H NMR and <sup>13</sup>C NMR for Compound 2t in DMSO-d<sub>6</sub>

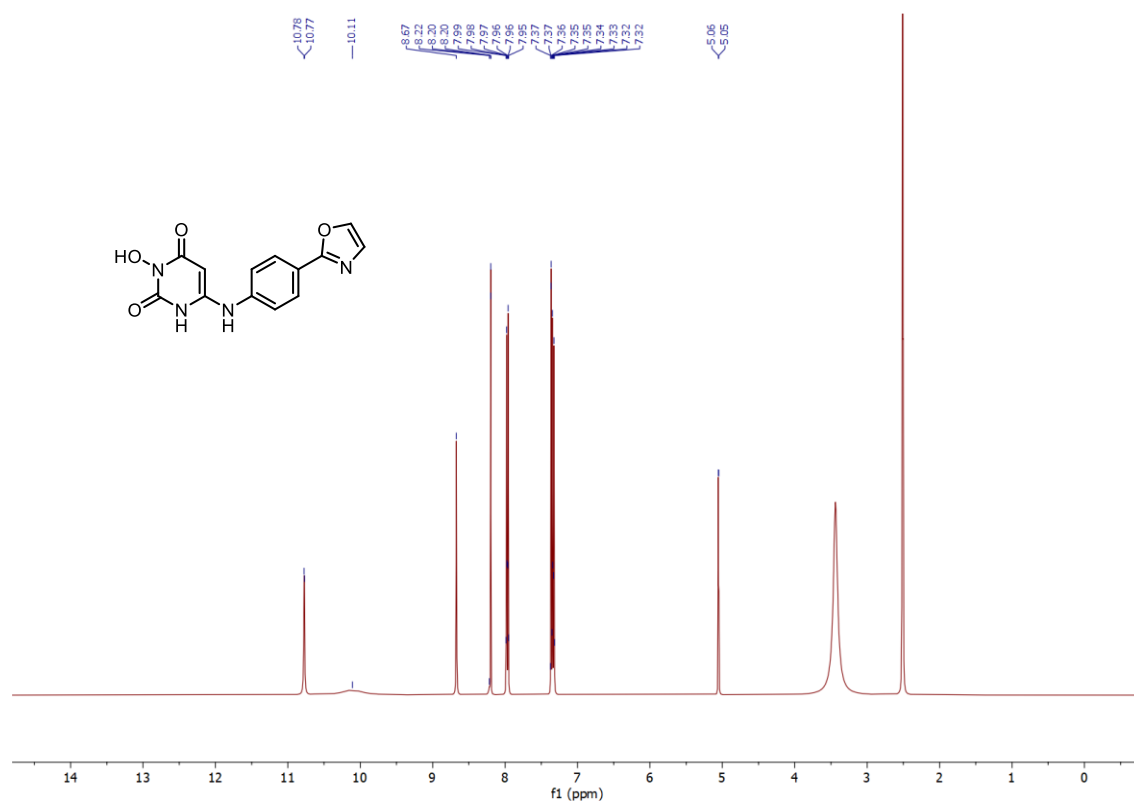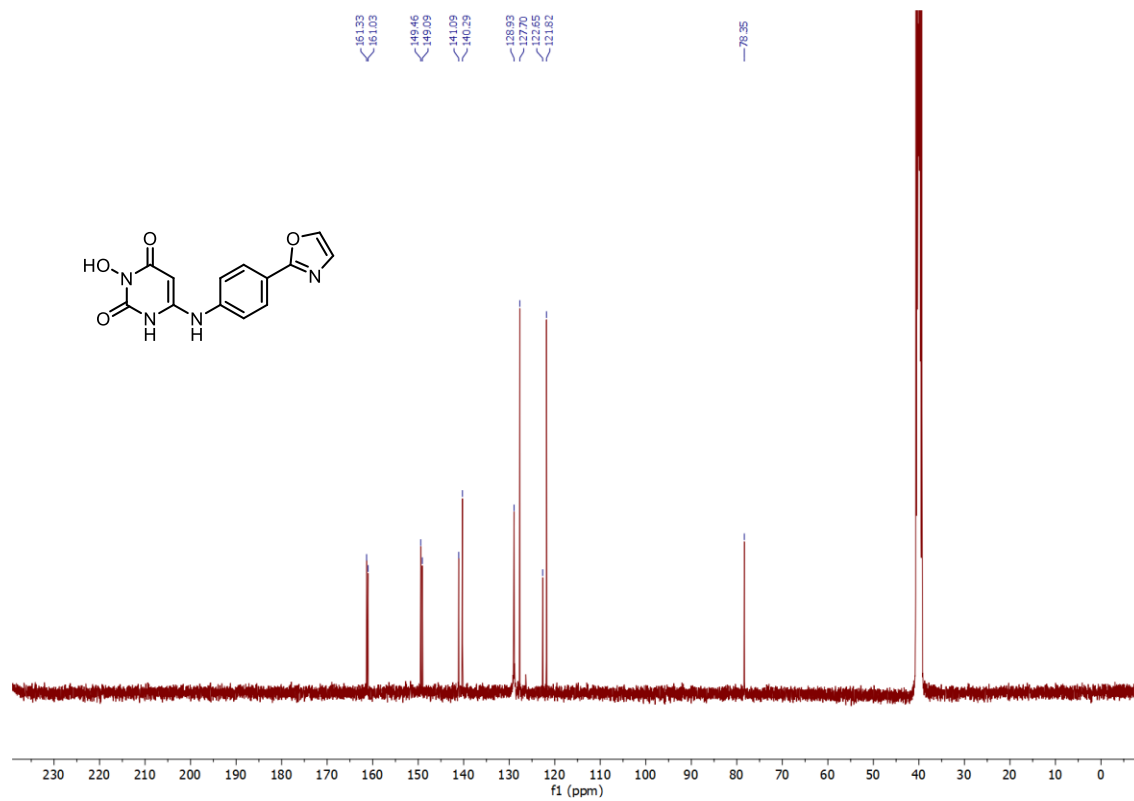

# HRMS and HPLC Trace for Compound 2t

|                    |                    |                               |         |                        |                                         |
|--------------------|--------------------|-------------------------------|---------|------------------------|-----------------------------------------|
| <b>Sample Name</b> | MS-03-211 depro    | <b>Position</b>               | P2-A2   | <b>Instrument Name</b> | TOF Walk Up                             |
| <b>User Name</b>   | Syafiq             | <b>Inj Vol</b>                | 1       | <b>InjPosition</b>     |                                         |
| <b>Sample Type</b> | Sample             | <b>IRM Calibration Status</b> | Success | <b>Data Filename</b>   | MMI_ESI_Positive_MS-03-211 depro_0660.d |
| <b>ACQ Method</b>  | MMI_ESI_Positive.m | <b>Comment</b>                |         | <b>Acquired Time</b>   | 12/17/2025 11:49:49 AM (UTC-06:00)      |

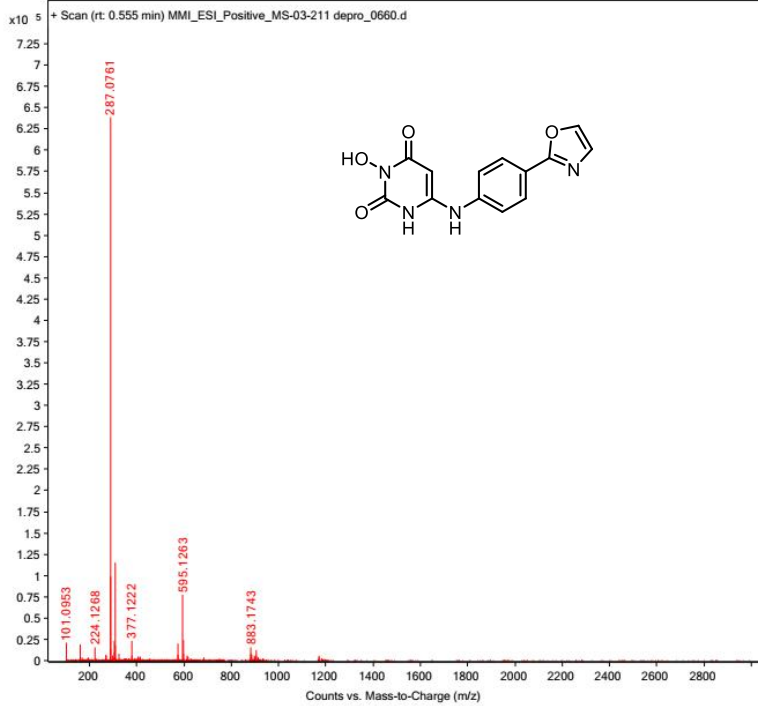

Sample Info : MS-03-211(1)

Additional Info : Peak(s) manually integrated

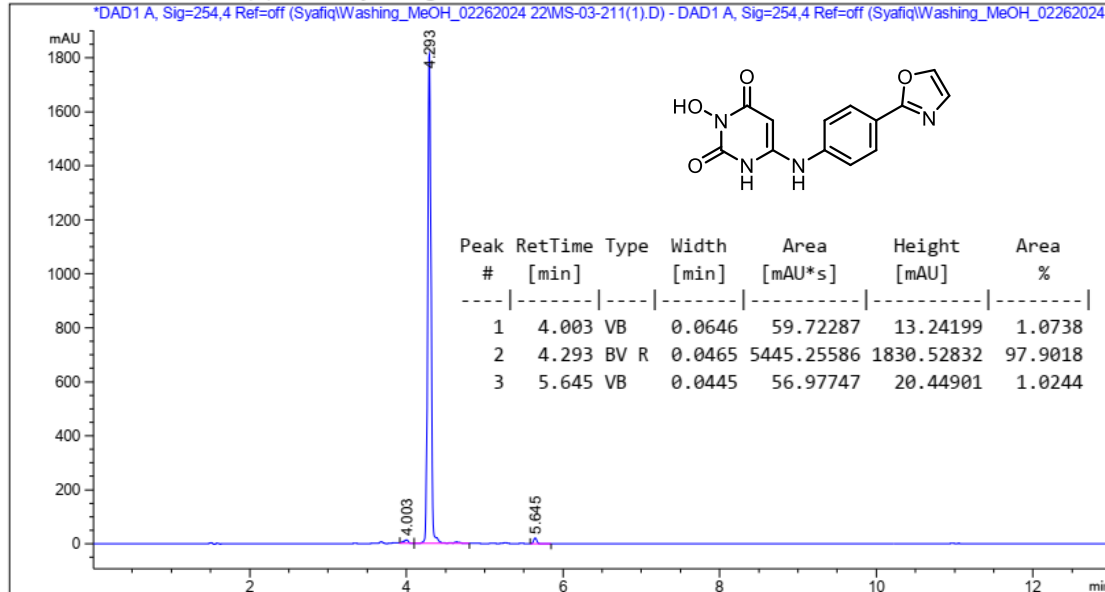

# <sup>1</sup>H NMR and <sup>13</sup>C NMR for Compound 2u in DMSO-d<sub>6</sub>

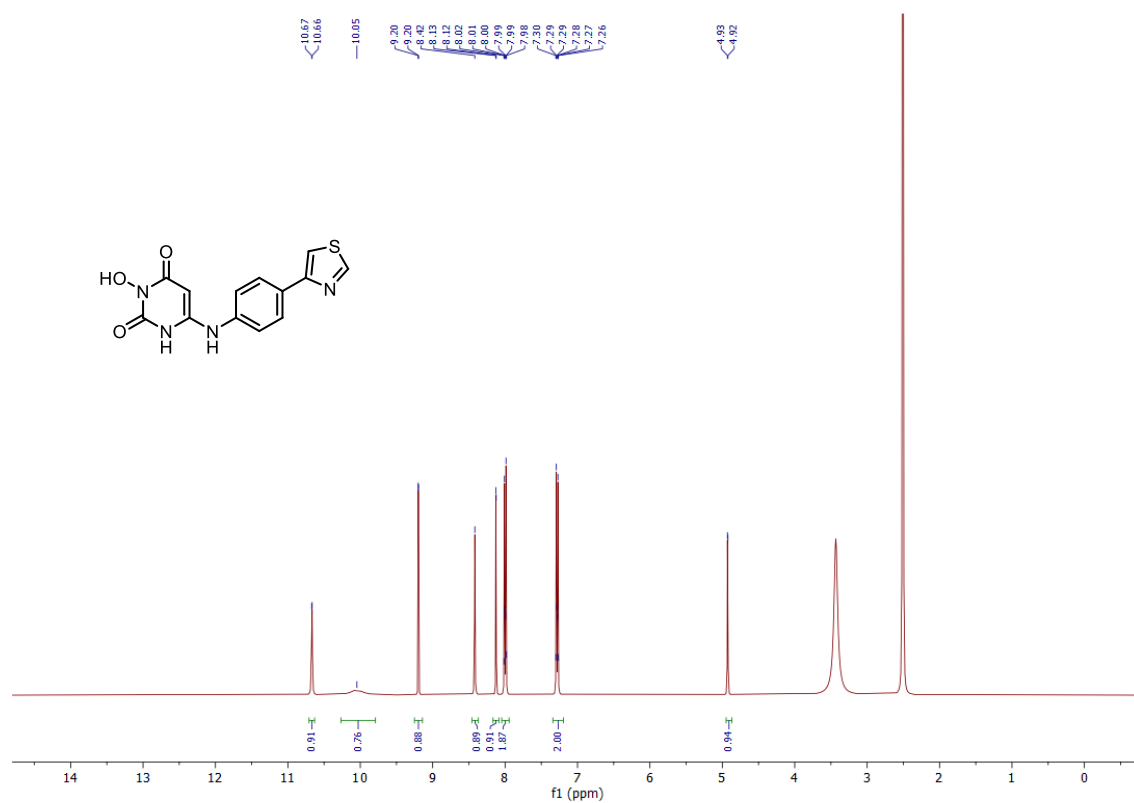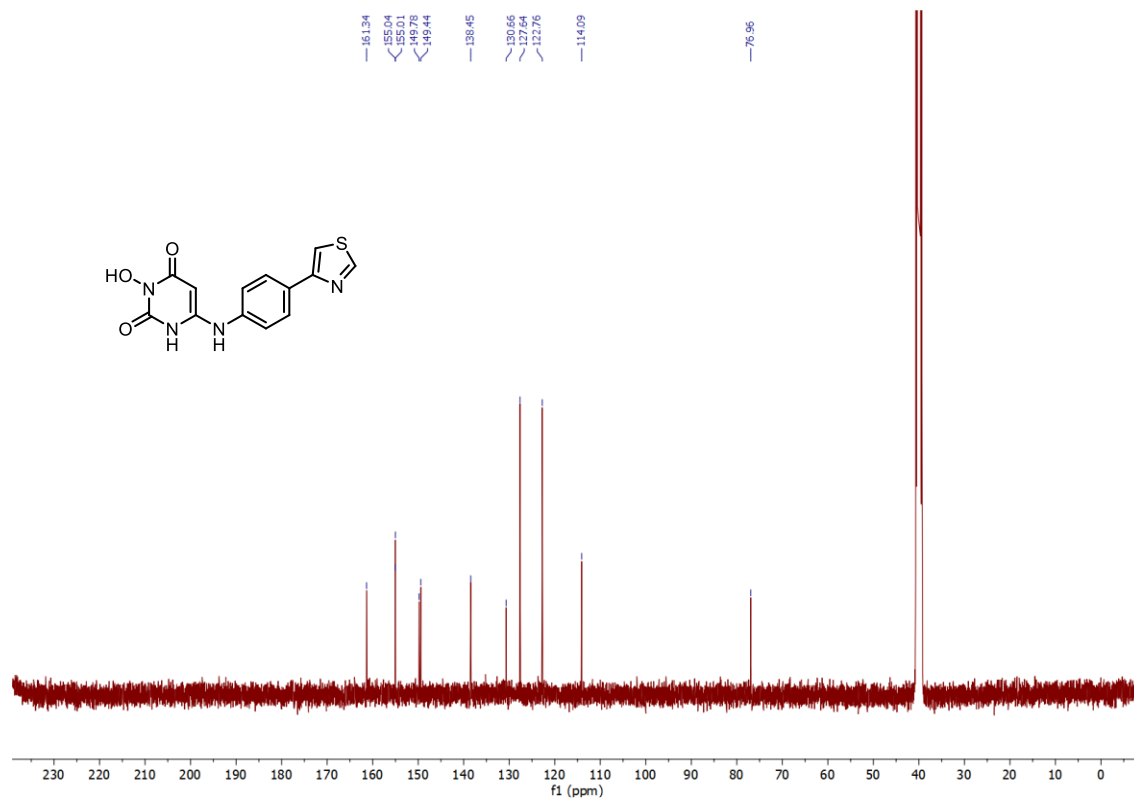

# HRMS and HPLC Trace for Compound 2u

**Sample Name** MS-04-23 depro      **Position** P2-A1      **Instrument Name** TOF Walk Up  
**User Name** Syafiq      **Inj Vol** 1      **InjPosition**  
**Sample Type** Sample      **IRM Calibration Status** Success      **Data Filename** MMI\_ESI\_Positive\_MS-04-23 depro\_0658.d  
**ACQ Method** MMI\_ESI\_Positive.m      **Comment**      **Acquired Time** 12/17/2025 11:38:00 AM (UTC-06:00)

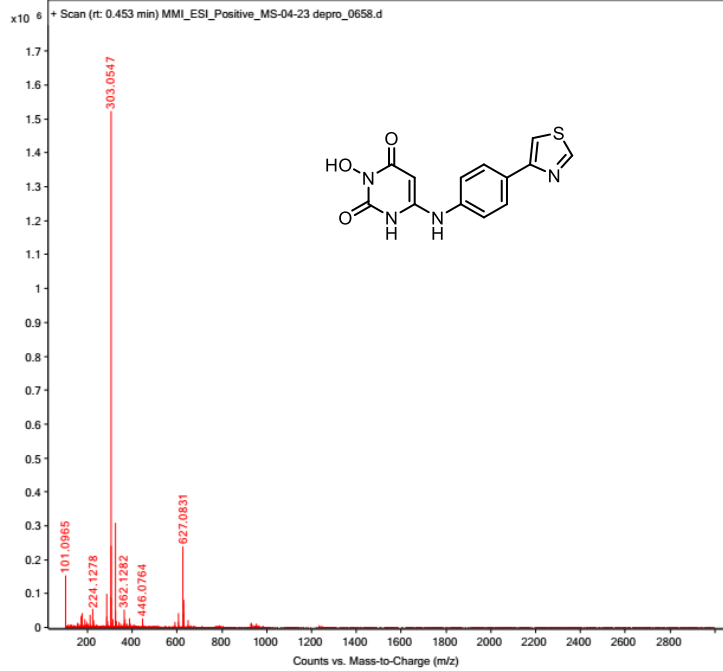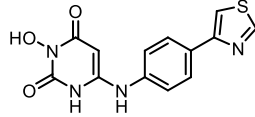

Sample Info : MS-04-23 (1)

Additional Info : Peak(s) manually integrated

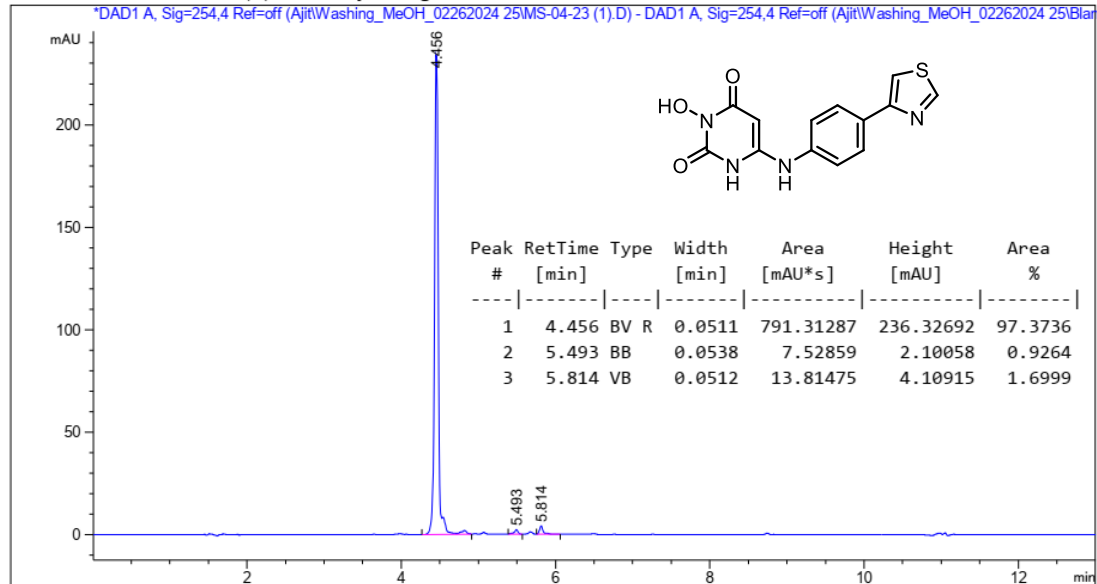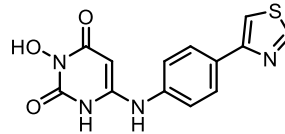

# $^1\text{H}$ NMR and $^{13}\text{C}$ NMR for Compound 2v in $\text{DMSO-}d_6$

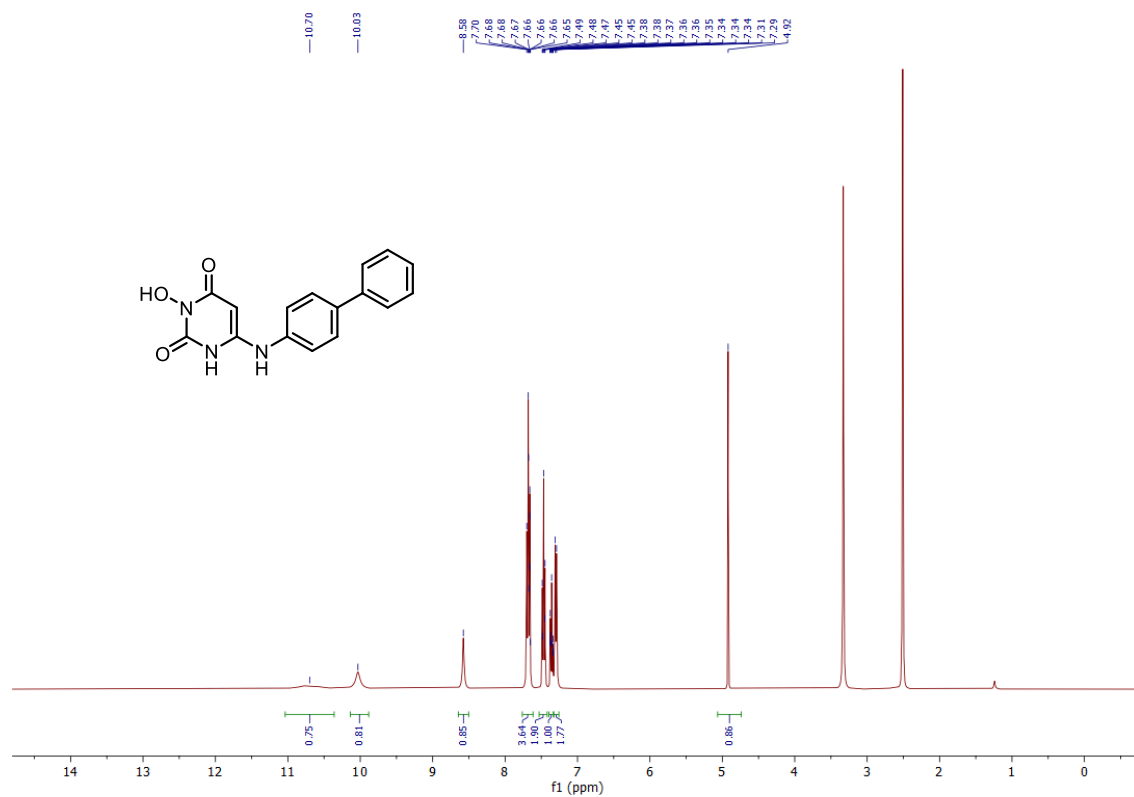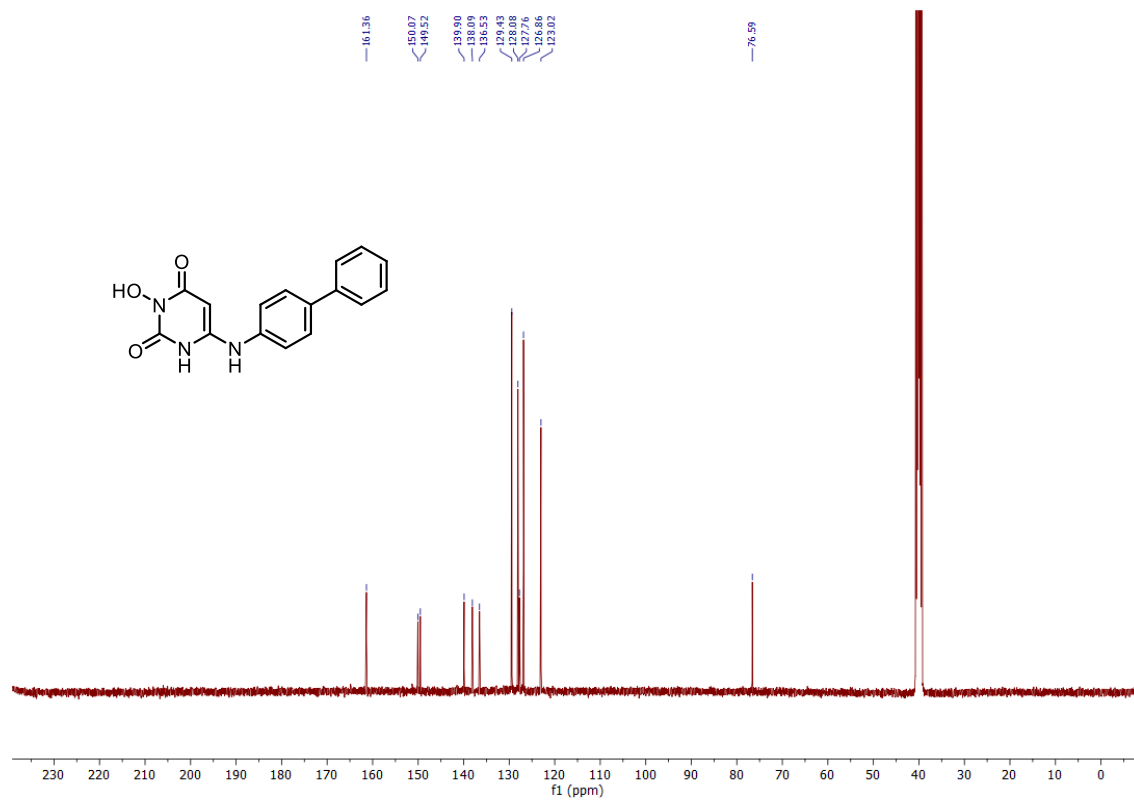

# HRMS for Compound 2v

|             |                    |                        |         |                 |                                   |
|-------------|--------------------|------------------------|---------|-----------------|-----------------------------------|
| Sample Name | ZW-153             | Position               | P2-D10  | Instrument Name | TOF Walk Up                       |
| User Name   | Syafiq             | Inj Vol                | 1       | InjPosition     |                                   |
| Sample Type | Sample             | IRM Calibration Status | Success | Data Filename   | MMI_ESI_Negative_ZW-153_0981.d    |
| ACQ Method  | MMI_ESI_Negative.m | Comment                |         | Acquired Time   | 1/13/2026 11:29:15 AM (UTC-06:00) |

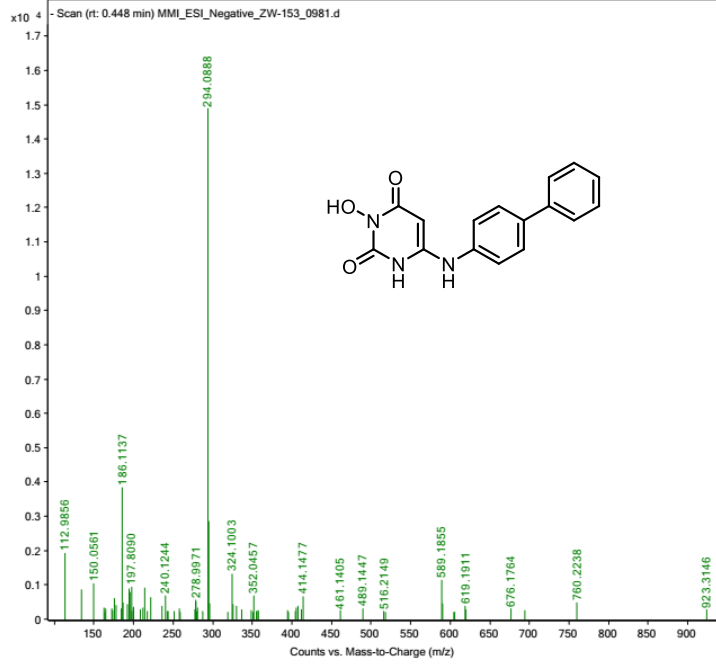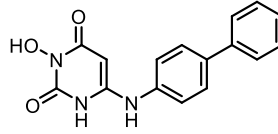

Sample Info : ZW-153

Additional Info : Peak(s) manually integrated

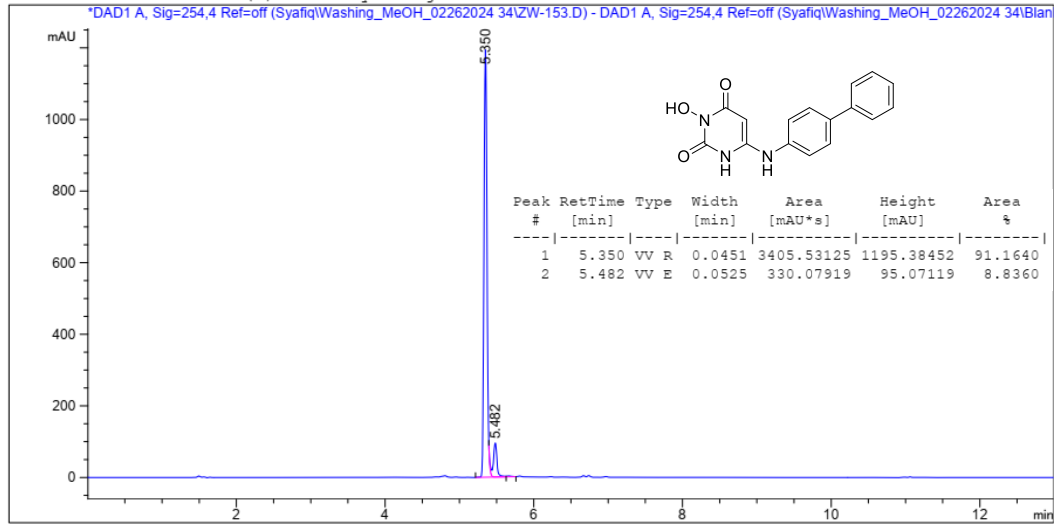

# $^1\text{H}$ NMR and $^{13}\text{C}$ NMR for Compound 2w in $\text{DMSO-}d_6$

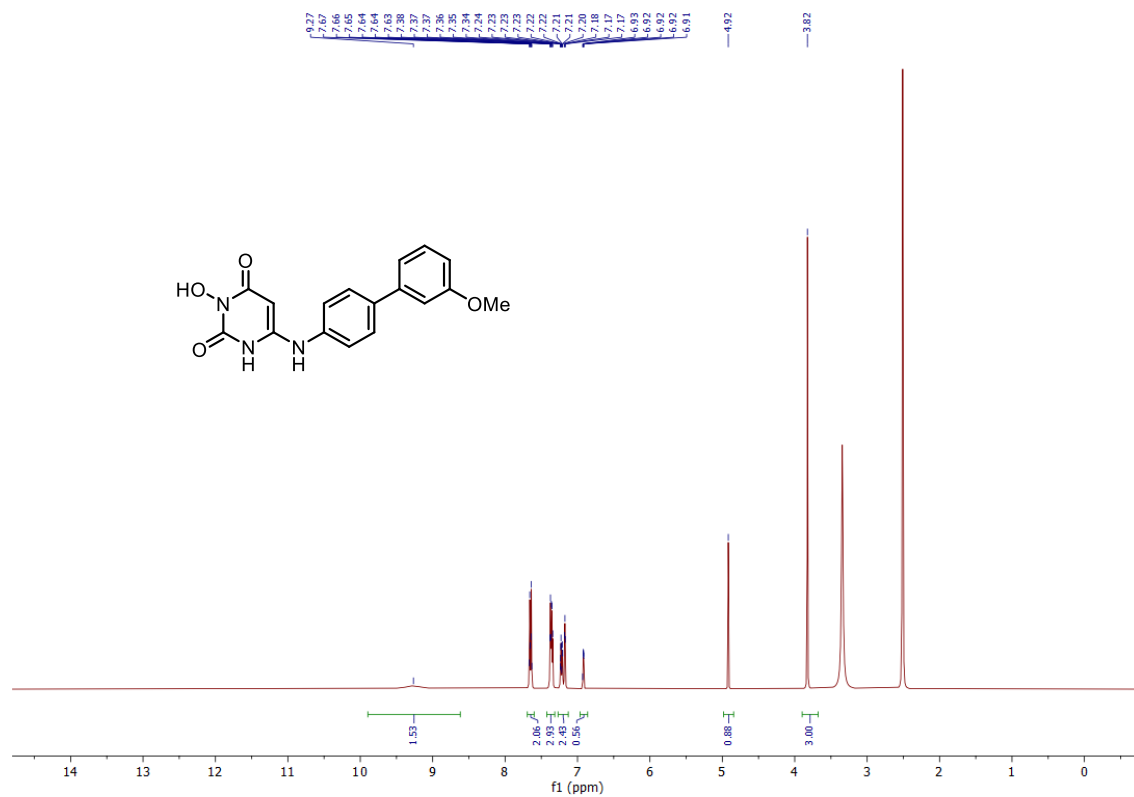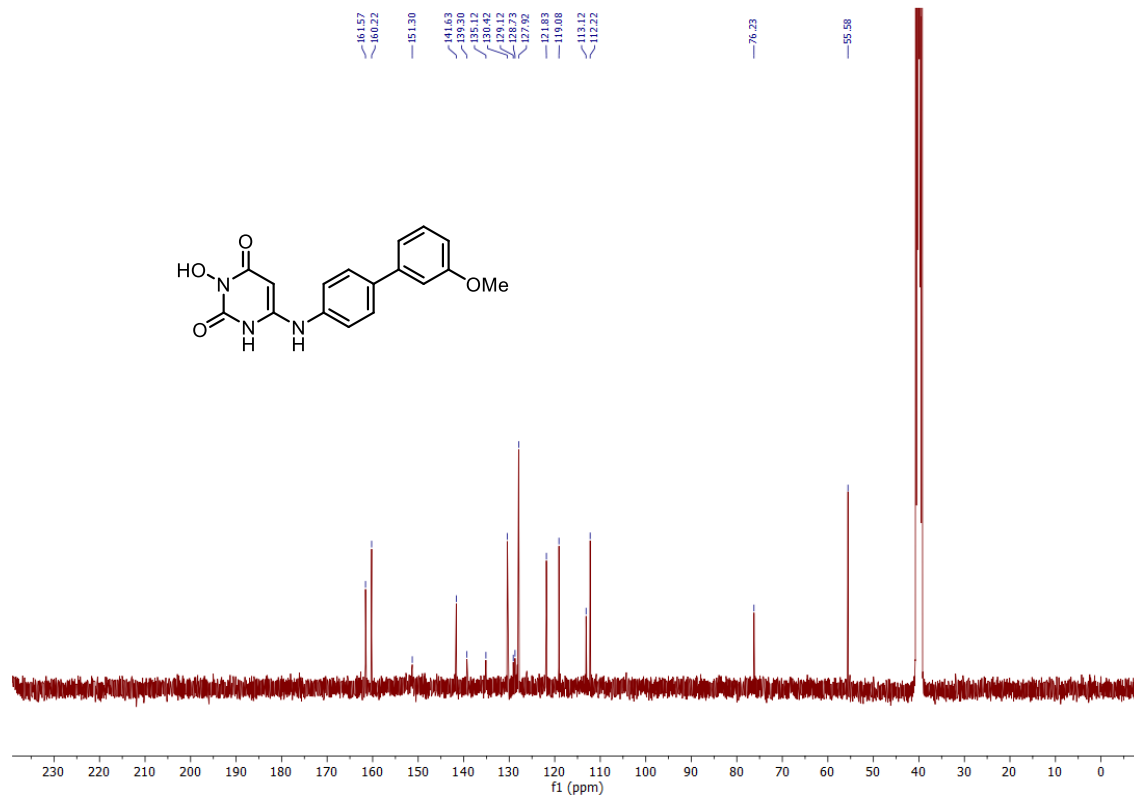

# HRMS for Compound 2w

|             |                    |                        |         |                 |                                   |
|-------------|--------------------|------------------------|---------|-----------------|-----------------------------------|
| Sample Name | ZW-151             | Position               | P2-D9   | Instrument Name | TOF Walk Up                       |
| User Name   | Syafiq             | Inj Vol                | 1       | InjPosition     |                                   |
| Sample Type | Sample             | IRM Calibration Status | Success | Data Filename   | MMI_ESI_Negative_ZW-151_0977.d    |
| ACQ Method  | MMI_ESI_Negative.m | Comment                |         | Acquired Time   | 1/13/2026 11:05:37 AM (UTC-06:00) |

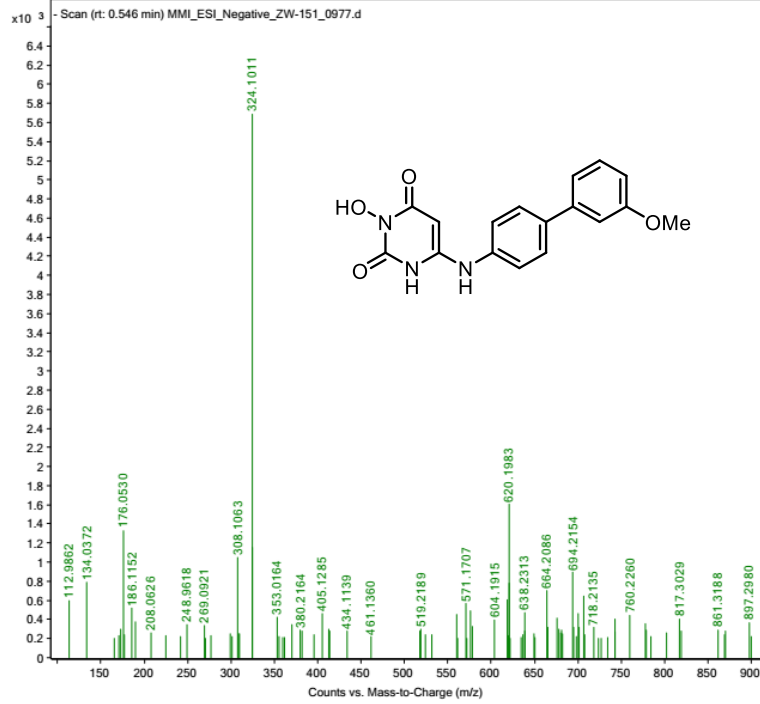

Sample Info : ZW-151

Additional Info : Peak(s) manually integrated

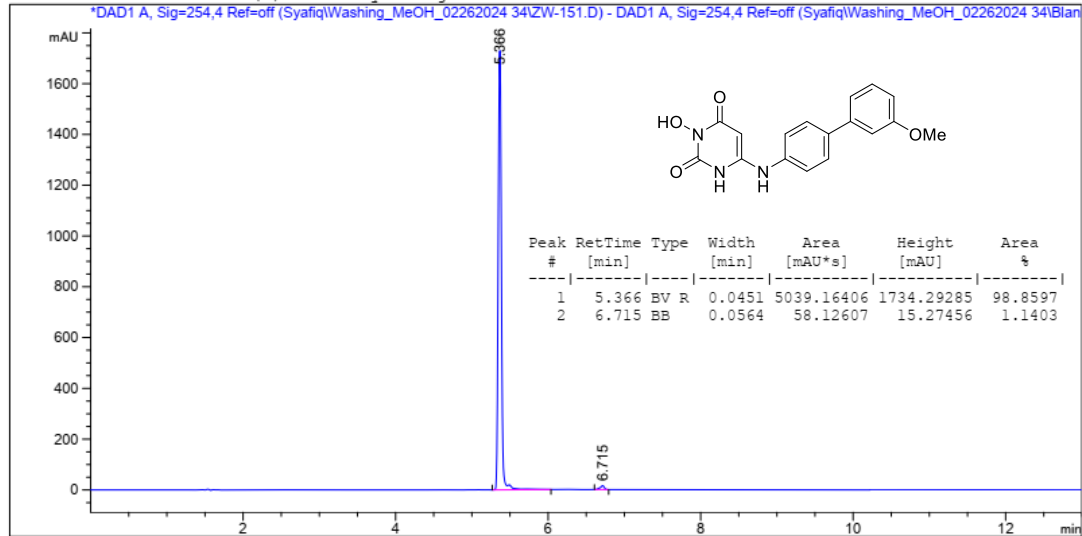

# <sup>1</sup>H NMR and <sup>13</sup>C NMR for Compound 3a in DMSO-d<sub>6</sub>

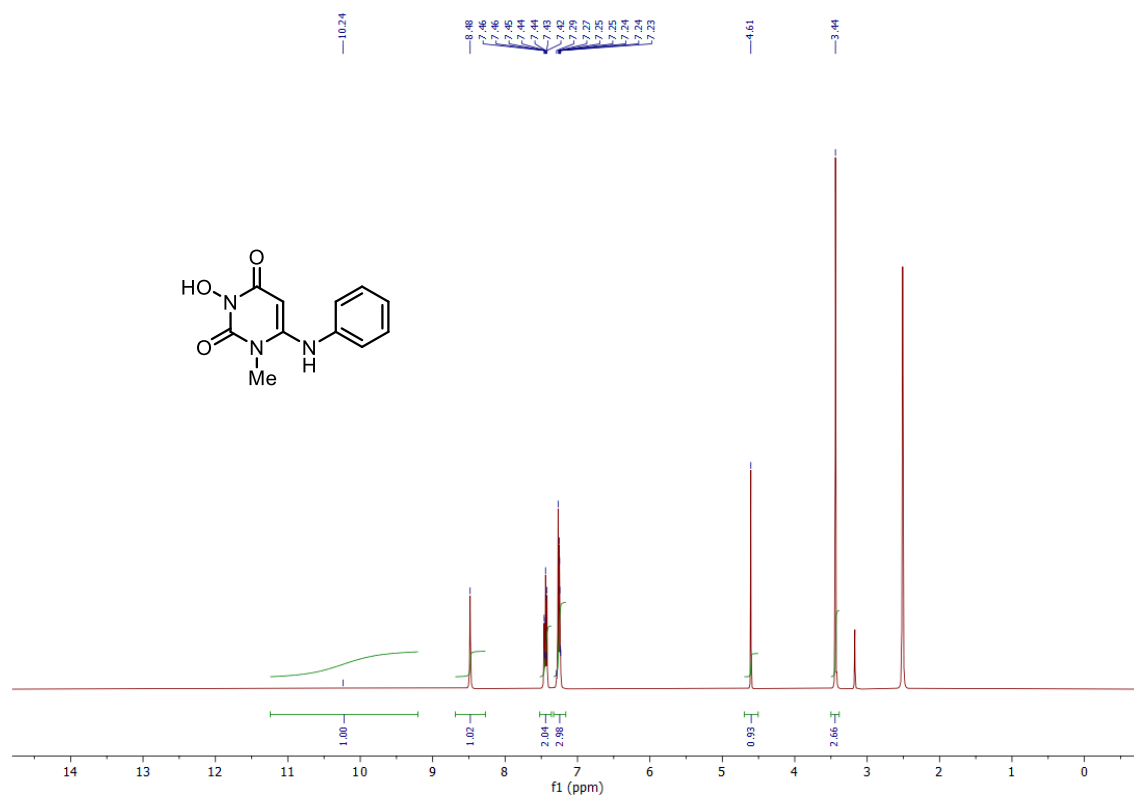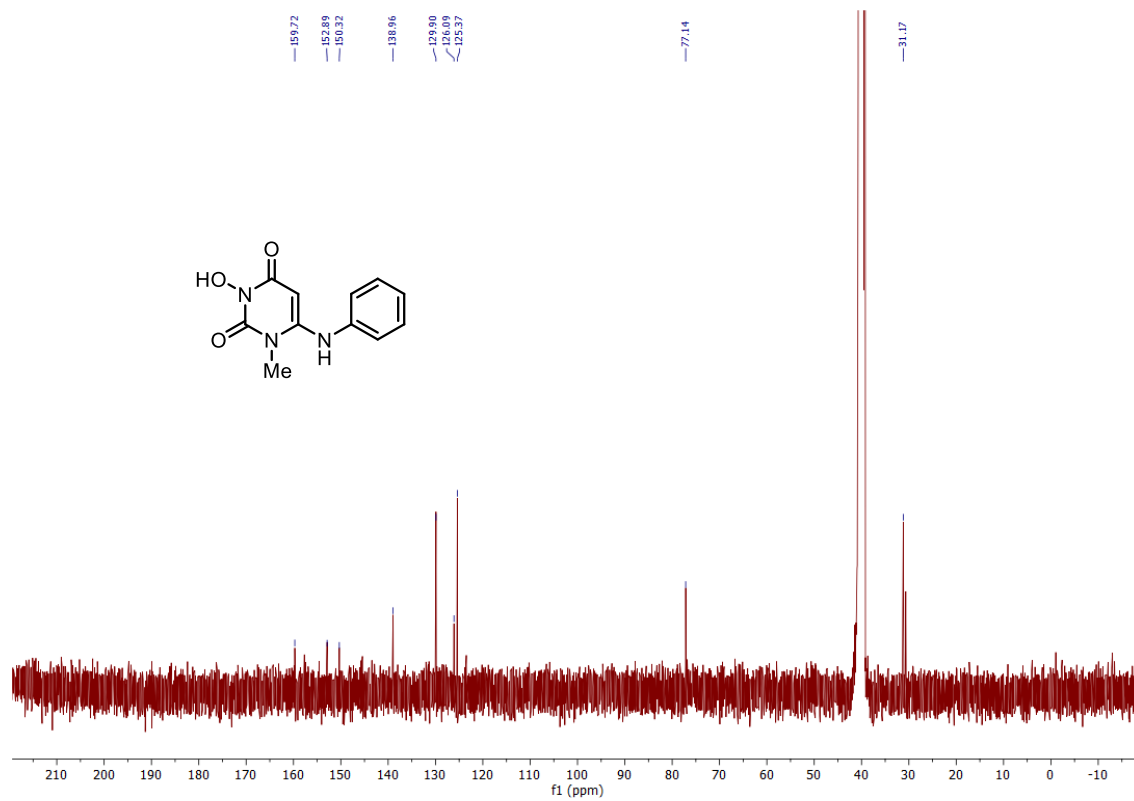

# HRMS and HPLC Trace for Compound 3a

|                    |                    |                               |         |                        |                                         |
|--------------------|--------------------|-------------------------------|---------|------------------------|-----------------------------------------|
| <b>Sample Name</b> | MS-03-223 depro    | <b>Position</b>               | P1-D6   | <b>Instrument Name</b> | TOF Walk Up                             |
| <b>User Name</b>   | Syafiq             | <b>Inj Vol</b>                | 1       | <b>InjPosition</b>     |                                         |
| <b>Sample Type</b> | Sample             | <b>IRM Calibration Status</b> | Success | <b>Data Filename</b>   | MMI_ESI_Negative_MS-03-223 depro_2239.d |
| <b>ACQ Method</b>  | MMI_ESI_Negative.m | <b>Comment</b>                |         | <b>Acquired Time</b>   | 3/30/2026 8:49:09 AM (UTC-05:00)        |

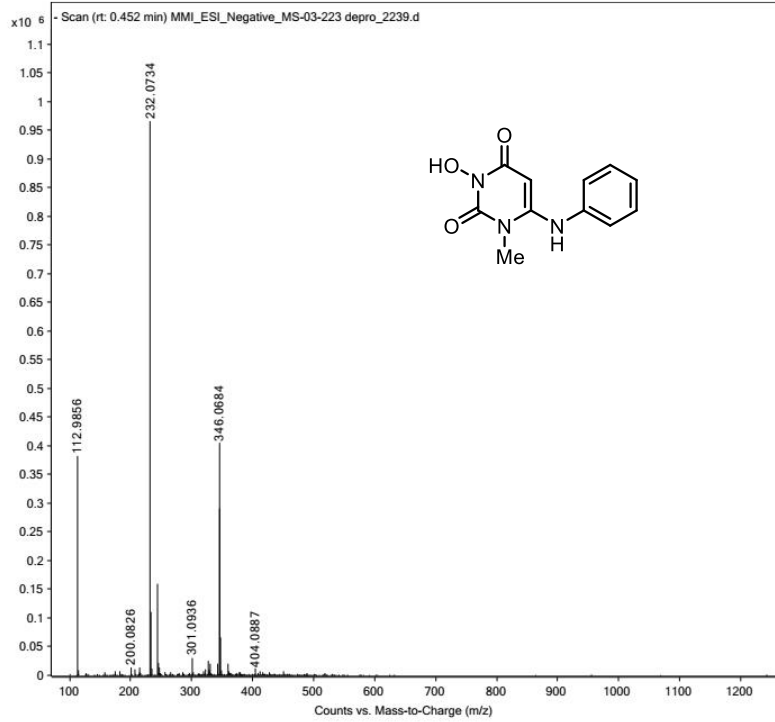

Sample Info : MS-03-223 Depro

Additional Info : Peak(s) manually integrated

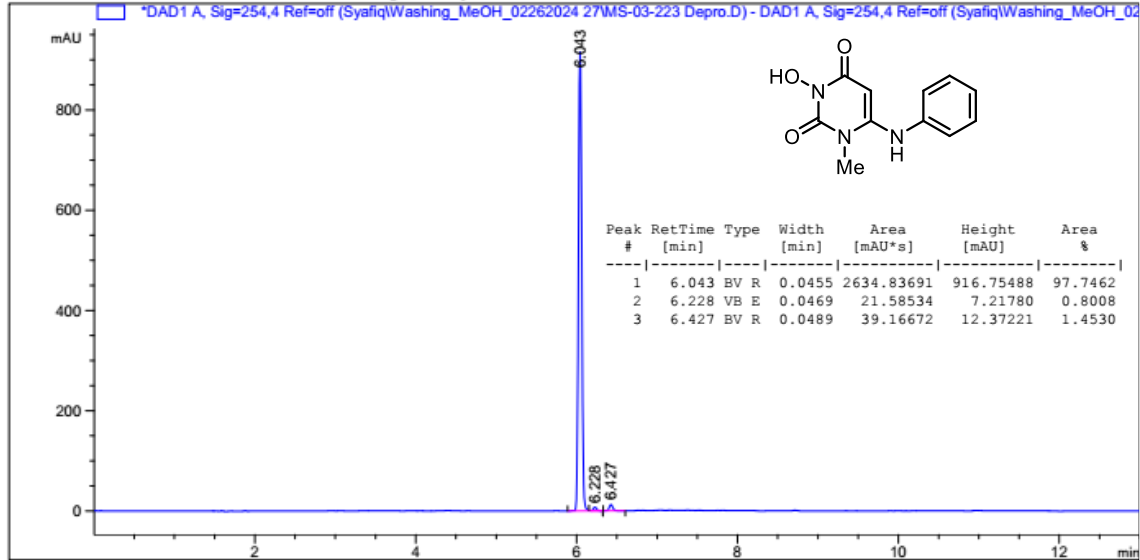

# $^1\text{H}$ NMR and $^{13}\text{C}$ NMR for Compound 3b in $\text{DMSO-}d_6$

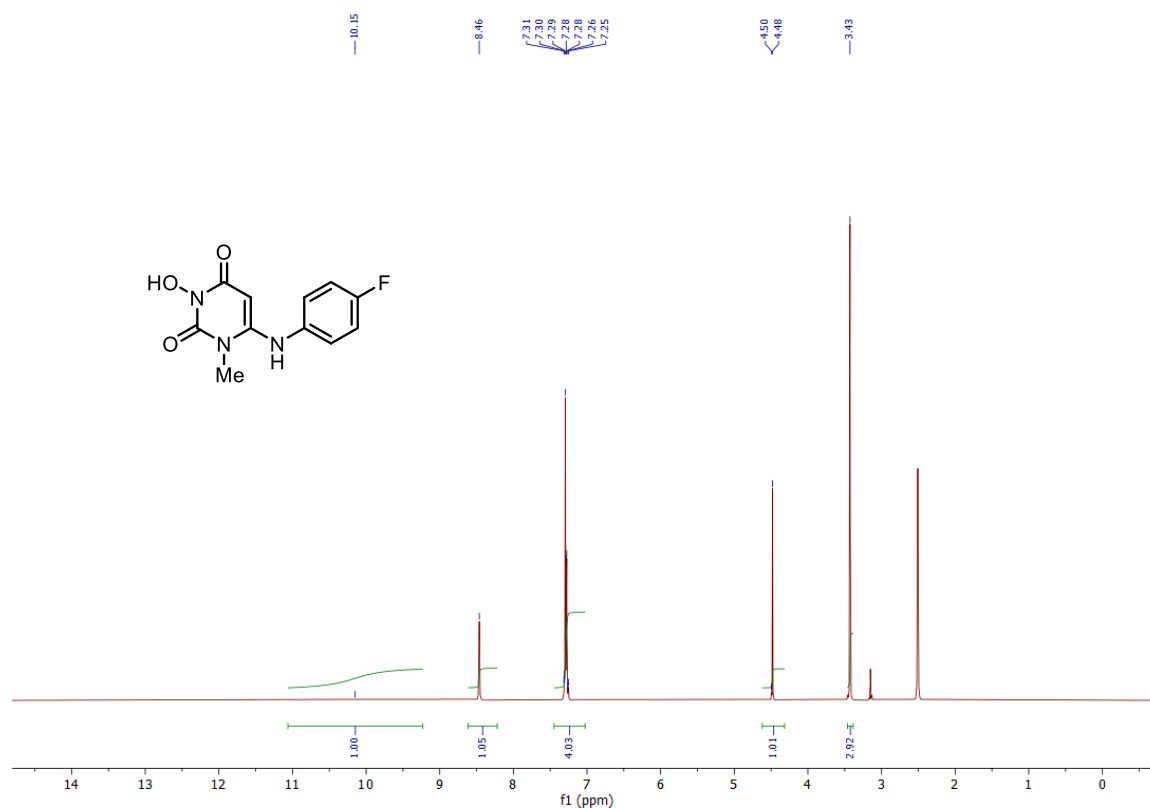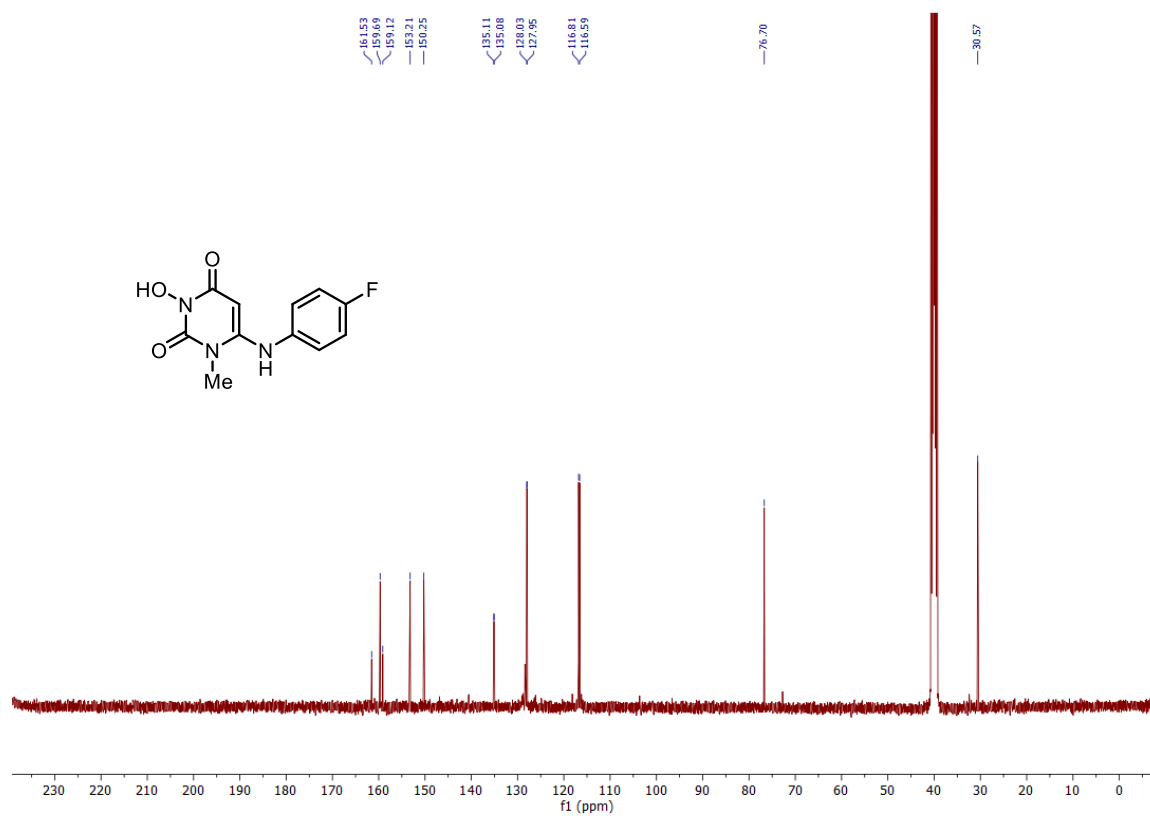

# HRMS for Compound 3b

|                    |                    |                               |         |                        |                                        |
|--------------------|--------------------|-------------------------------|---------|------------------------|----------------------------------------|
| <b>Sample Name</b> | MS-04-35 depro     | <b>Position</b>               | P1-E2   | <b>Instrument Name</b> | TOF Walk Up                            |
| <b>User Name</b>   | Syafiq             | <b>Inj Vol</b>                | 1       | <b>InjPosition</b>     |                                        |
| <b>Sample Type</b> | Sample             | <b>IRM Calibration Status</b> | Success | <b>Data Filename</b>   | MMI_ESI_Negative_MS-04-35 depro_1475.d |
| <b>ACQ Method</b>  | MMI_ESI_Negative.m | <b>Comment</b>                |         | <b>Acquired Time</b>   | 3/10/2026 6:16:48 PM (UTC-05:00)       |

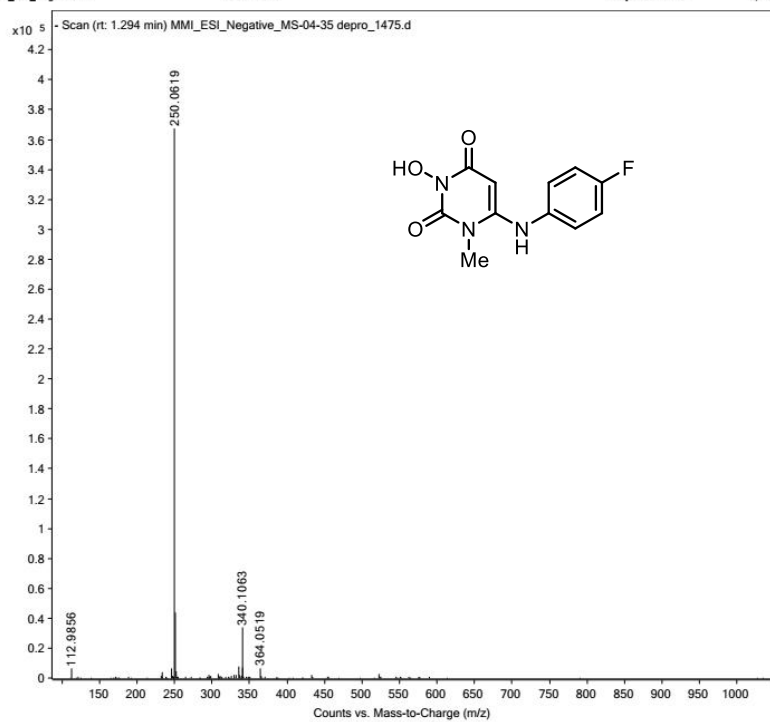

# $^1\text{H}$ NMR and $^{13}\text{C}$ NMR for Compound 3c in $\text{DMSO-}d_6$

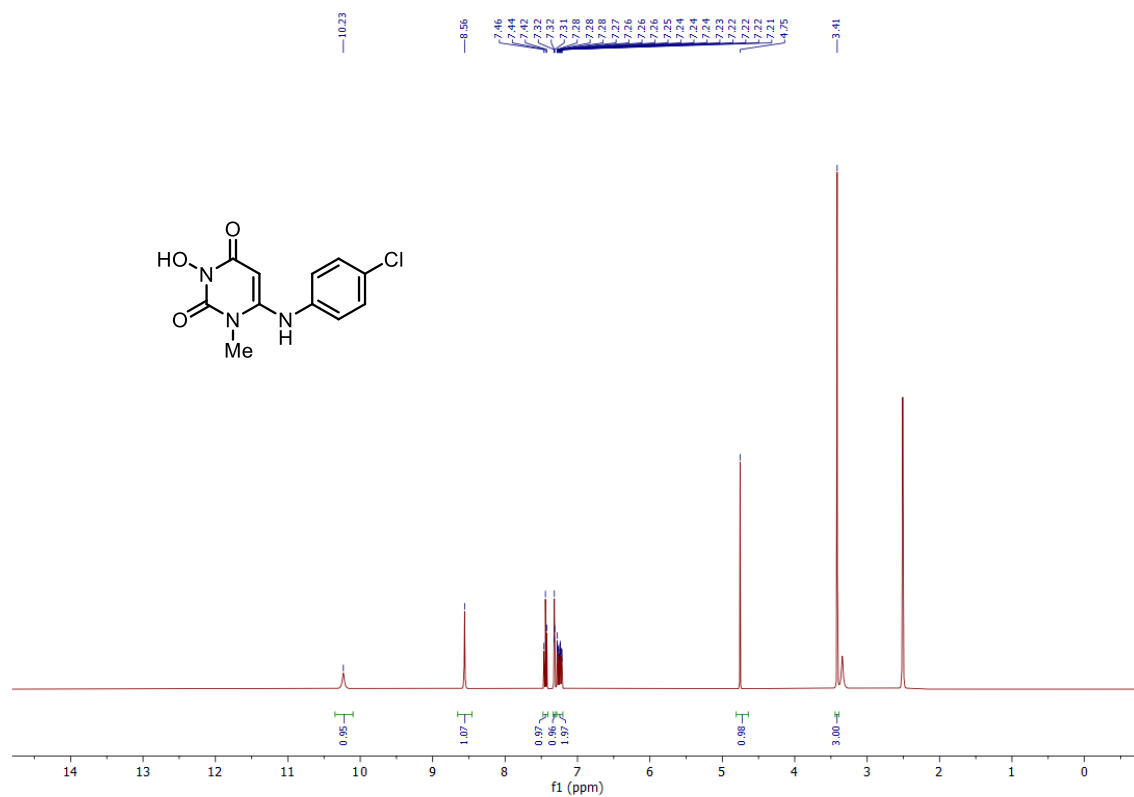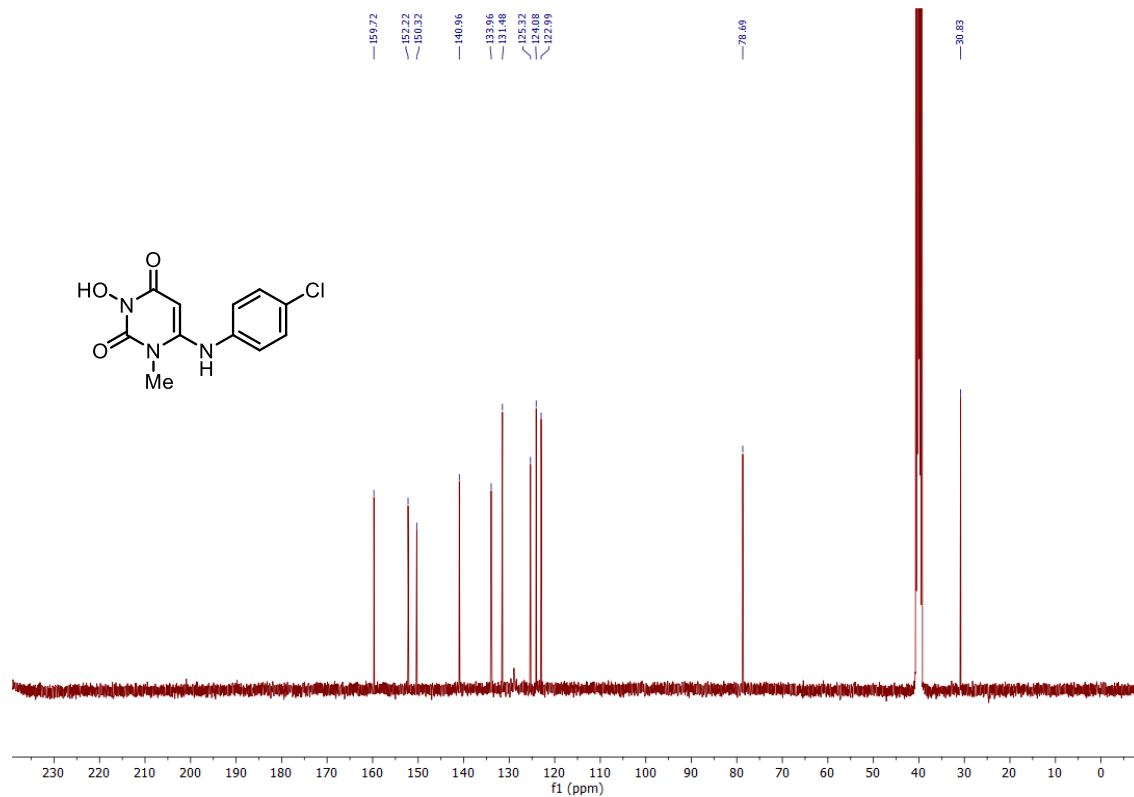

# HRMS and HPLC Trace for Compound 3c

**Sample Name** MS-04-127 depro      **Position** P1-B1      **Instrument Name** TOF Walk Up  
**User Name** Syafiq      **Inj Vol** 1      **InjPosition**  
**Sample Type** Sample      **IRM Calibration Status** Success      **Data Filename** MMI\_ESI\_Negative\_MS-04-127 depro\_1048.d  
**ACQ Method** MMI\_ESI\_Negative.m      **Comment**      **Acquired Time** 1/16/2026 11:04:51 AM (UTC-06:00)

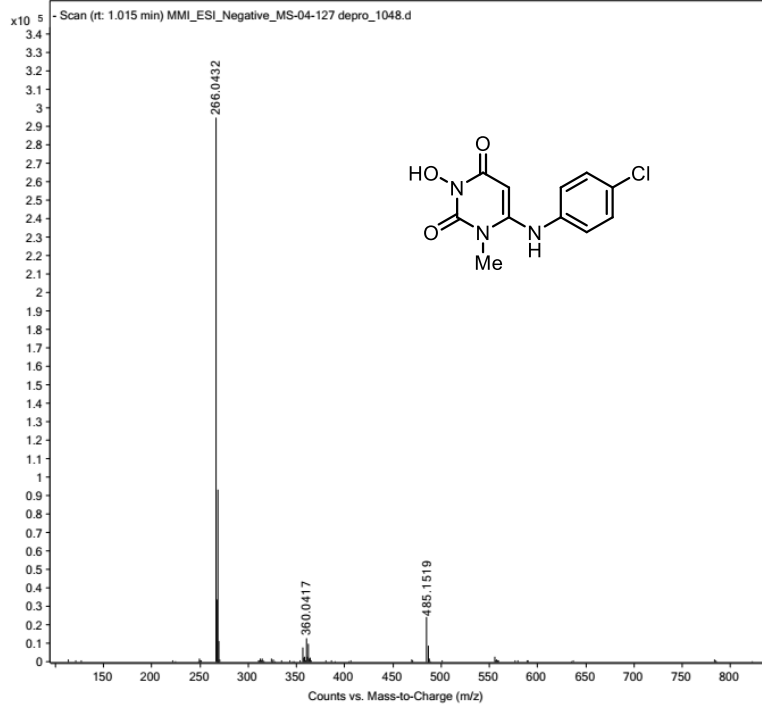

Sample Info : MS-04-127 Depro

Additional Info : Peak(s) manually integrated

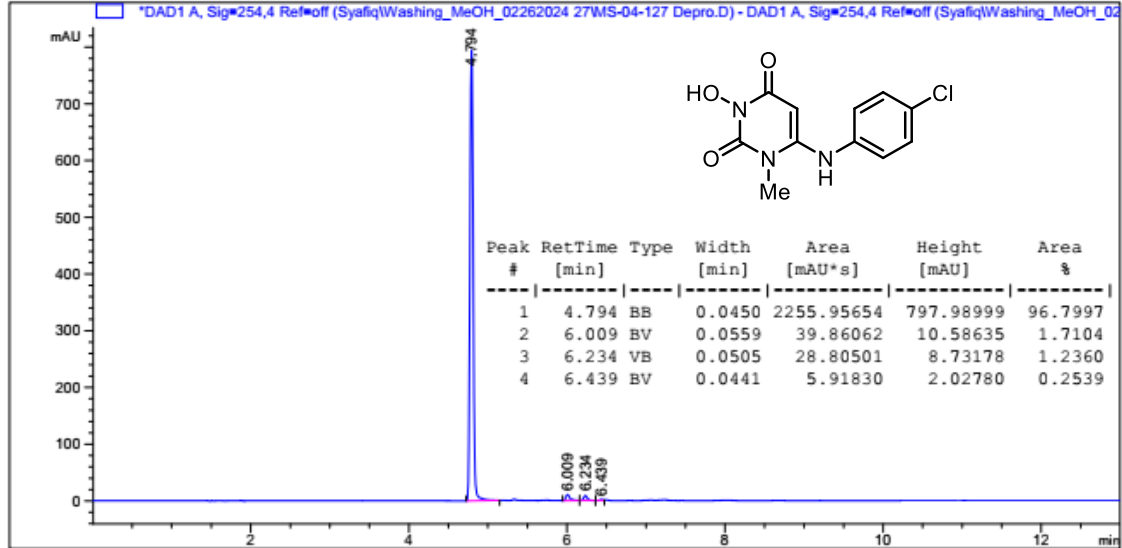

# $^1\text{H}$ NMR and $^{13}\text{C}$ NMR for Compound 3d in $\text{DMSO-}d_6$

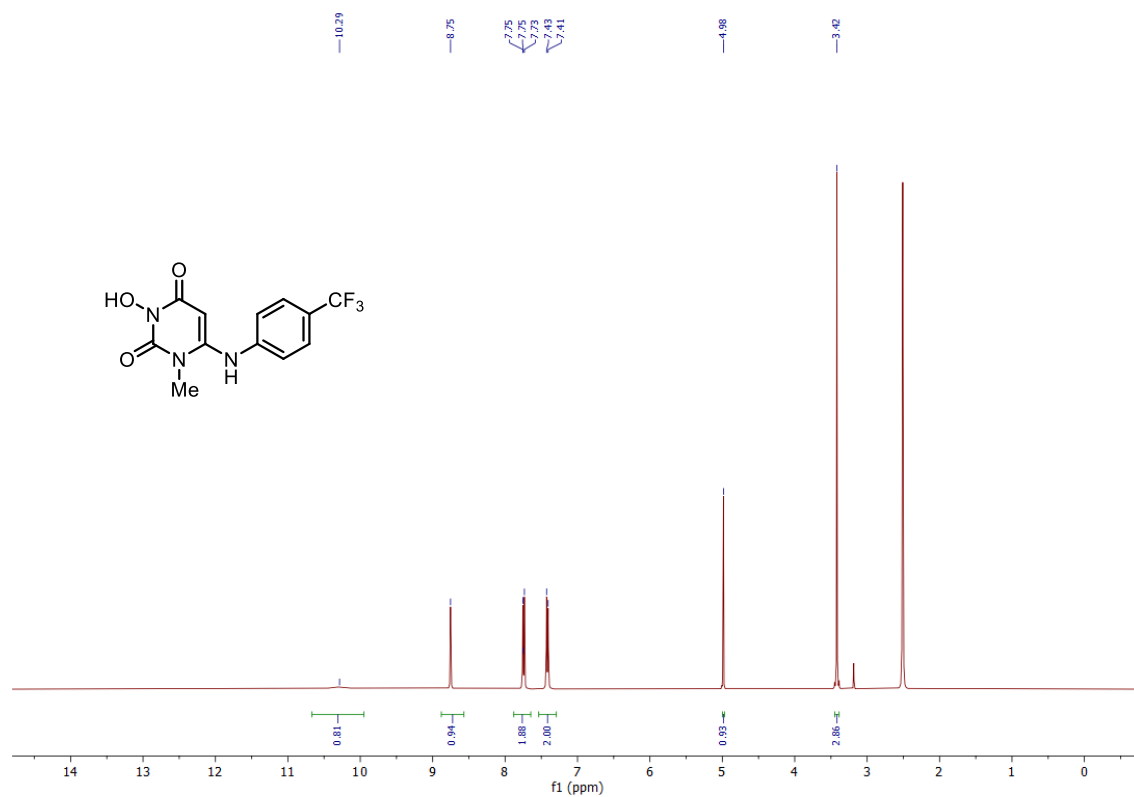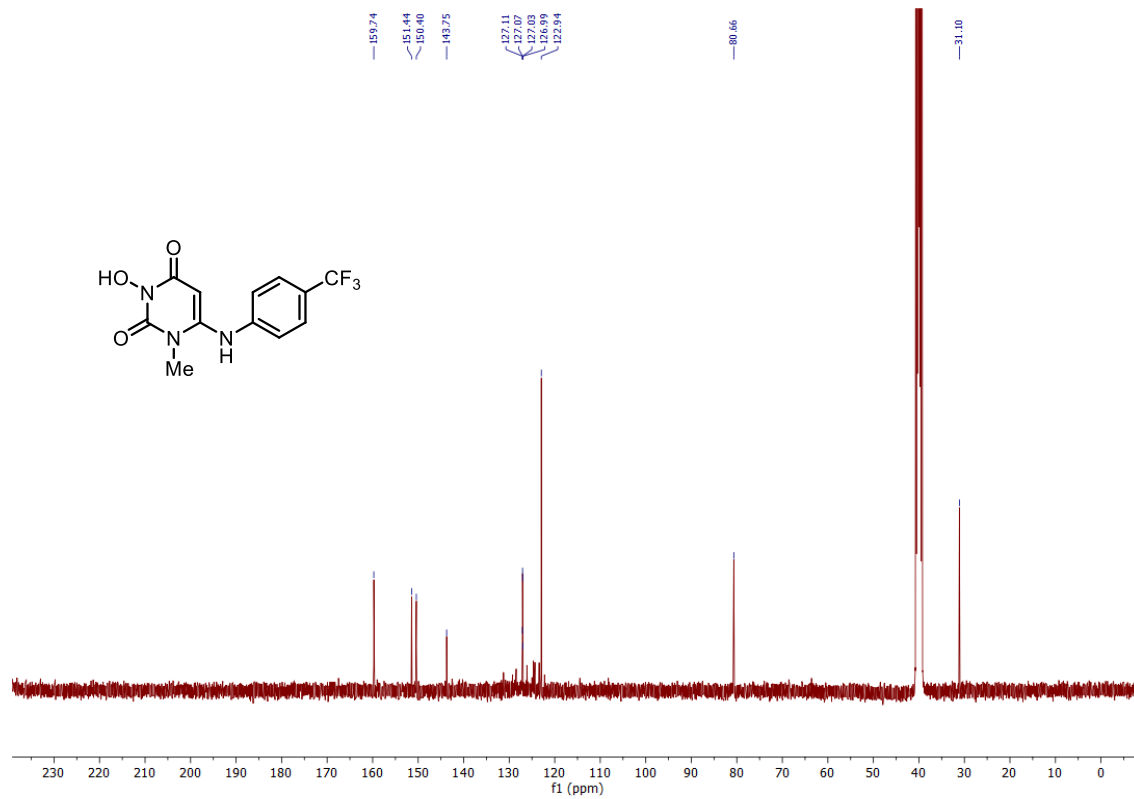

# HRMS for Compound 3d

|             |                    |                        |         |                 |                                        |
|-------------|--------------------|------------------------|---------|-----------------|----------------------------------------|
| Sample Name | MS-04-51 depro     | Position               | P1-A3   | Instrument Name | TOF Walk Up                            |
| User Name   | Syafiq             | Inj Vol                | 1       | InjPosition     |                                        |
| Sample Type | Sample             | IRM Calibration Status | Success | Data Filename   | MMI_ESI_Negative_MS-04-51 depro_1652.d |
| ACQ Method  | MMI_ESI_Negative.m | Comment                |         | Acquired Time   | 3/13/2026 3:47:50 PM (UTC-05:00)       |

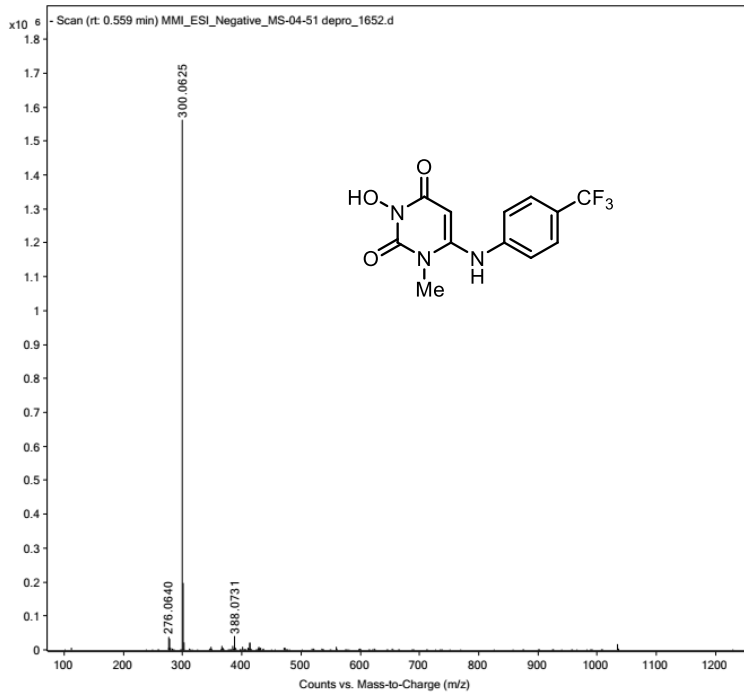

# $^1\text{H}$ NMR and $^{13}\text{C}$ NMR for Compound 3e in $\text{DMSO-}d_6$

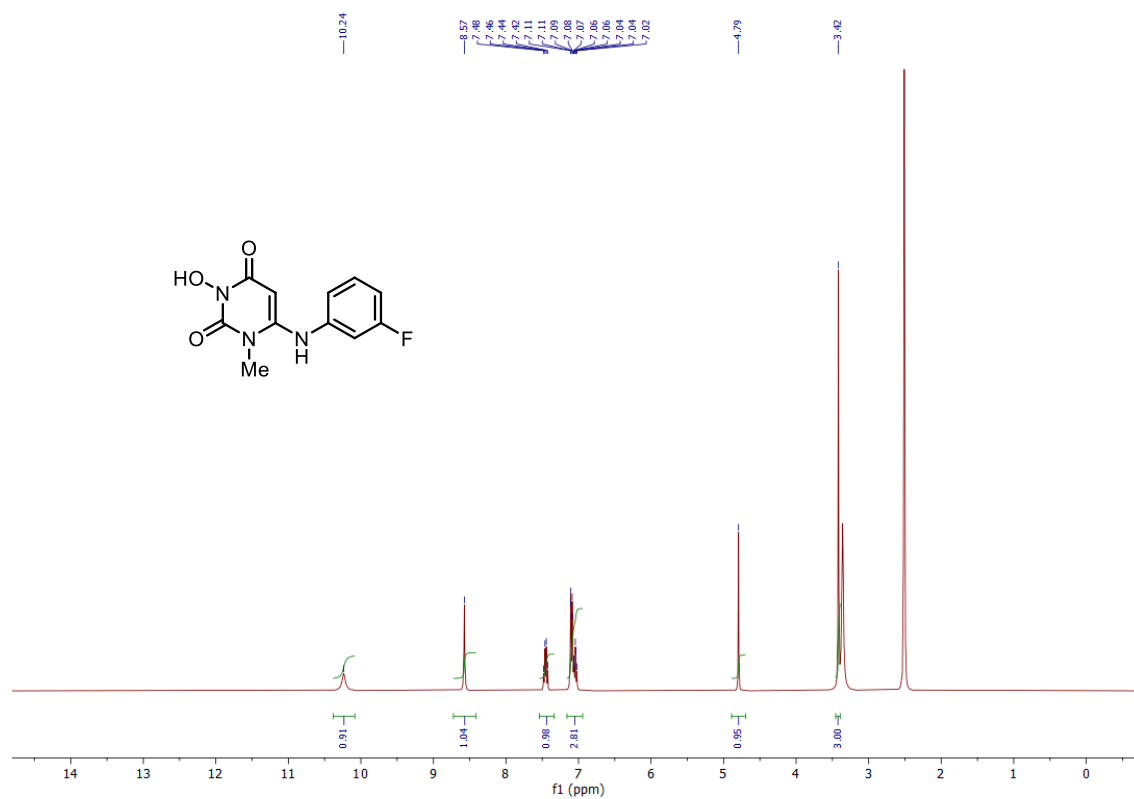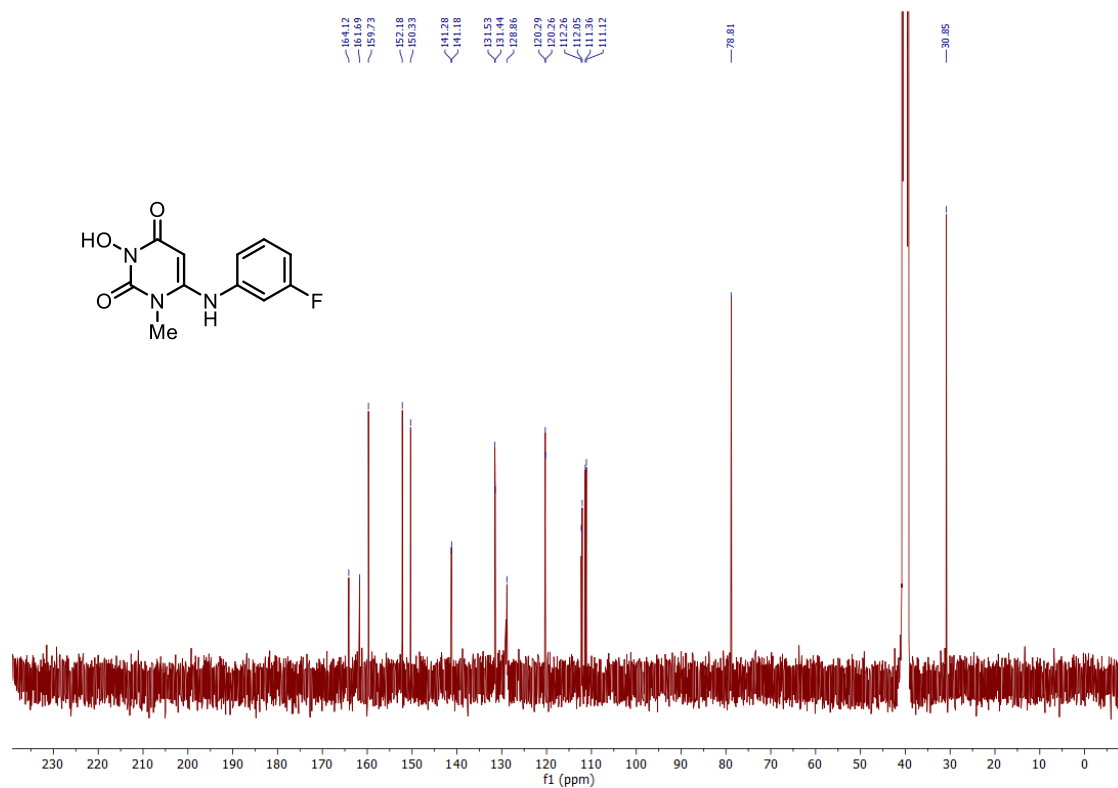

# HRMS and HPLC Trace for Compound 3e

|             |                    |                        |         |                 |                                        |
|-------------|--------------------|------------------------|---------|-----------------|----------------------------------------|
| Sample Name | MS-04-43 depro     | Position               | P1-87   | Instrument Name | TOF Walk Up                            |
| User Name   | Syafiq             | Inj Vol                | 1       | InjPosition     |                                        |
| Sample Type | Sample             | IRM Calibration Status | Success | Data Filename   | MMI_ESI_Negative_MS-04-43 depro_7463.d |
| ACQ Method  | MMI_ESI_Negative.m | Comment                |         | Acquired Time   | 9/3/2025 12:39:02 PM (UTC-05:00)       |

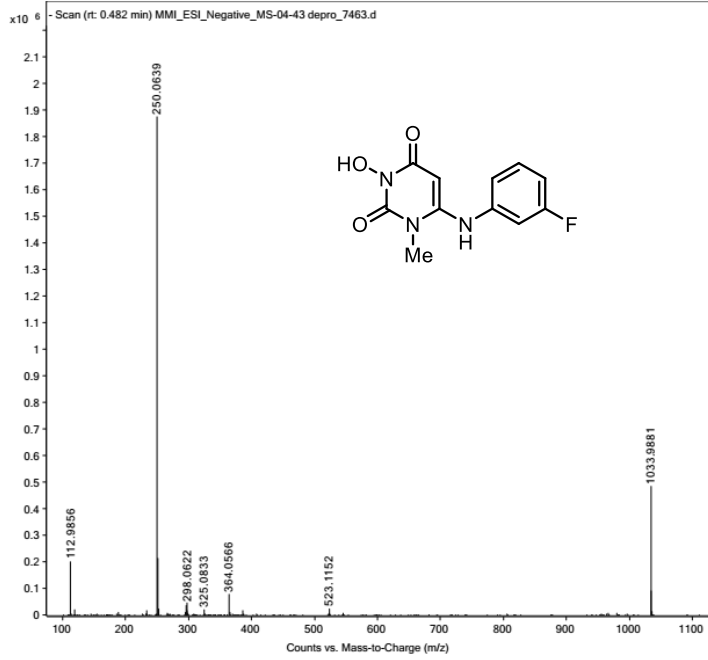

Sample Info : MS-04-43 Depro

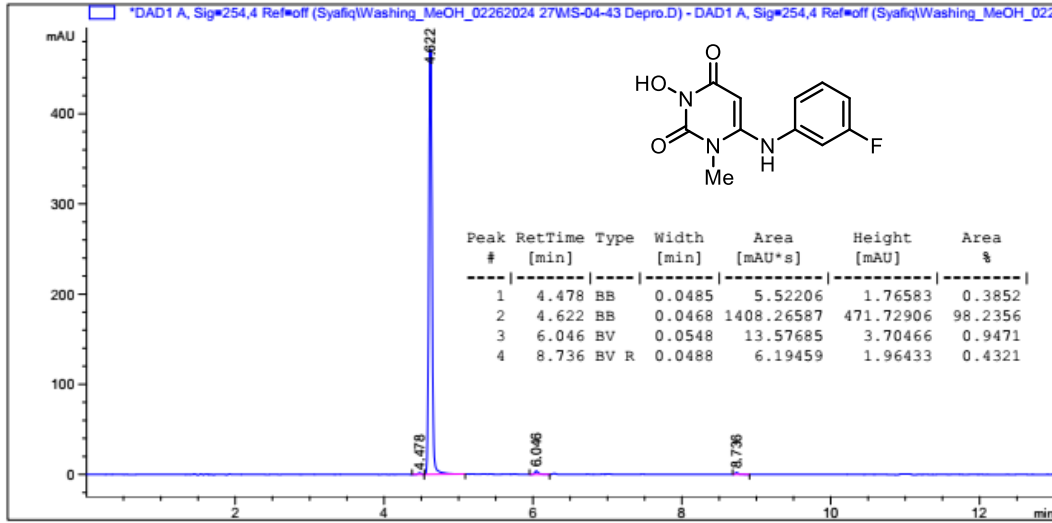

# $^1\text{H}$ NMR and $^{13}\text{C}$ NMR for Compound 3f in $\text{DMSO-}d_6$

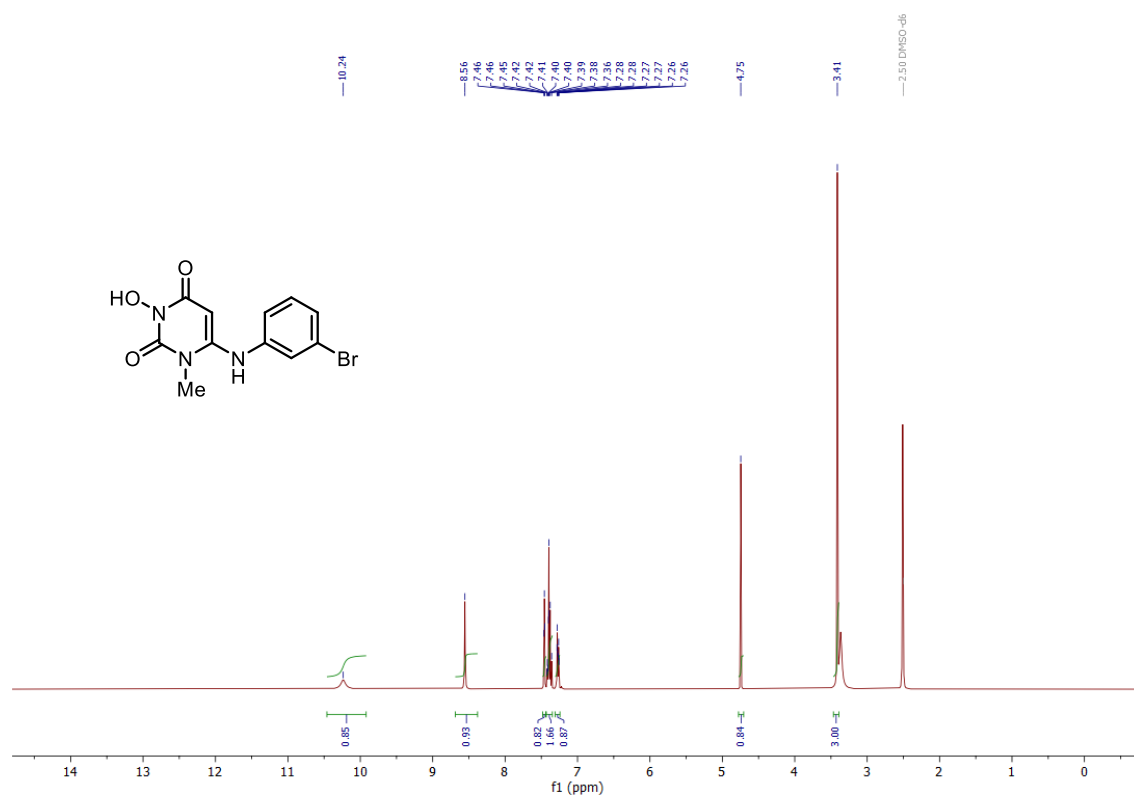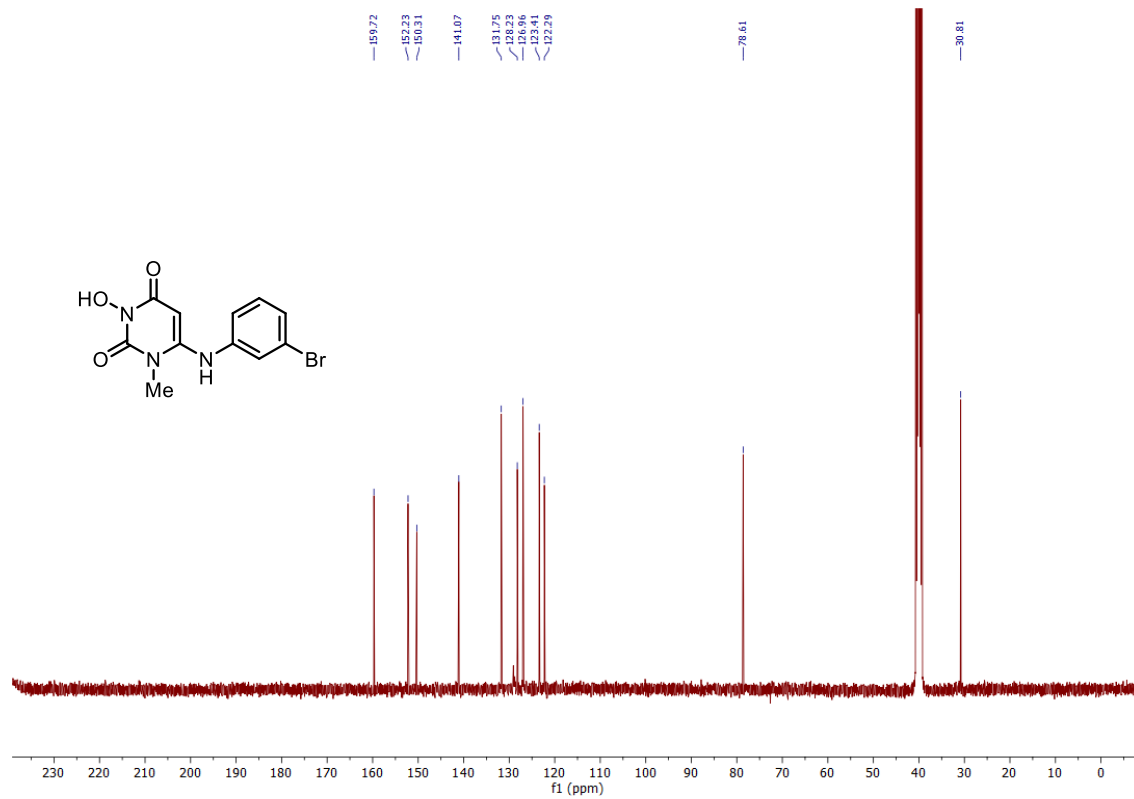

# HRMS and HPLC Trace for Compound 3f

|                    |                    |                               |         |                        |                                        |
|--------------------|--------------------|-------------------------------|---------|------------------------|----------------------------------------|
| <b>Sample Name</b> | MS-04-63 depro     | <b>Position</b>               | P2-C7   | <b>Instrument Name</b> | TOF Walk Up                            |
| <b>User Name</b>   | Syafiq             | <b>Inj Vol</b>                | 1       | <b>InjPosition</b>     |                                        |
| <b>Sample Type</b> | Sample             | <b>IRM Calibration Status</b> | Success | <b>Data Filename</b>   | MMI_ESI_Positive_MS-04-63 depro_7607.d |
| <b>ACQ Method</b>  | MMI_ESI_Positive.m | <b>Comment</b>                |         | <b>Acquired Time</b>   | 9/10/2025 1:50:58 PM (UTC-05:00)       |

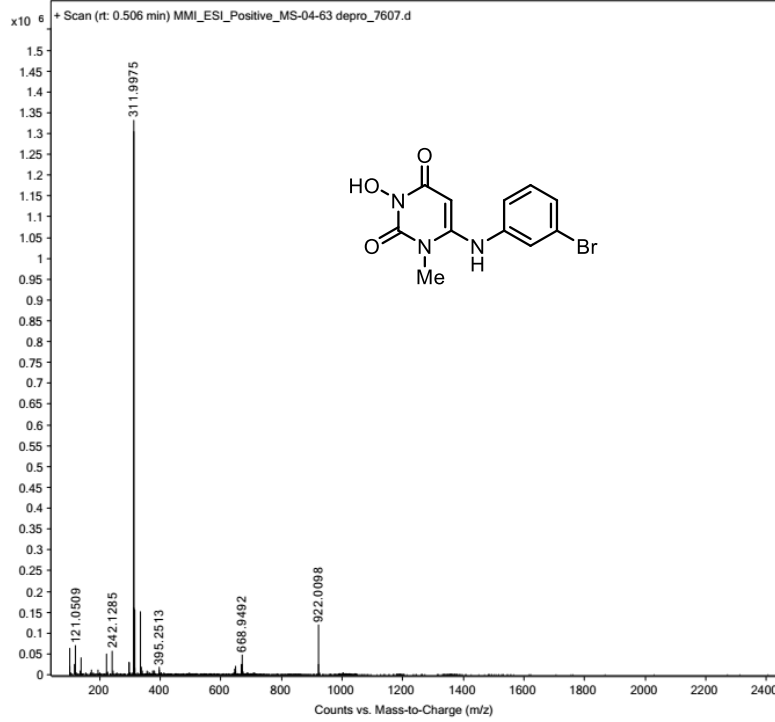

Sample Info : MS-04-63 Depro

Additional Info : Peak(s) manually integrated

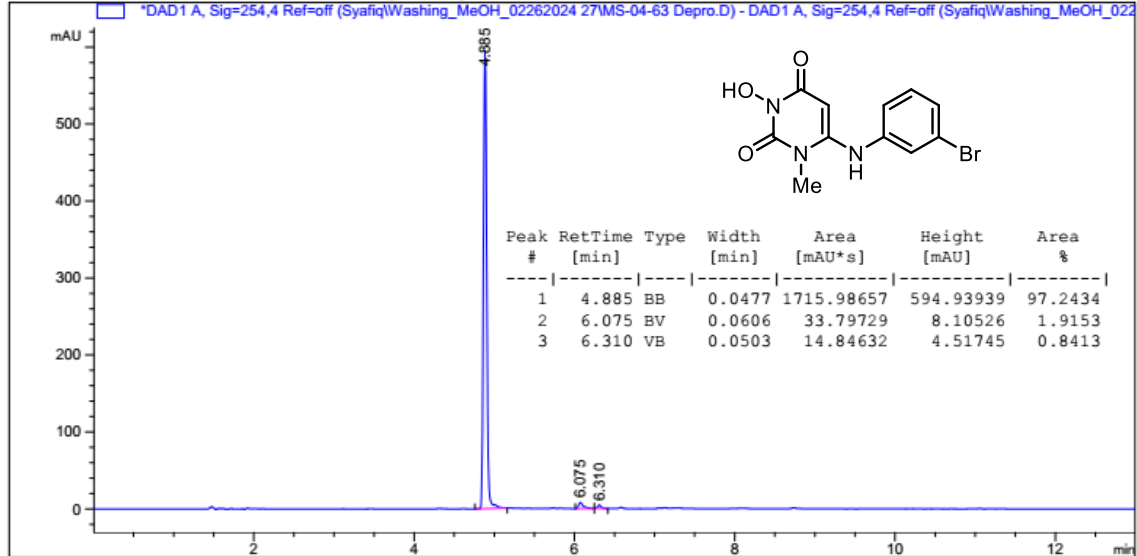

# $^1\text{H}$ NMR and $^{13}\text{C}$ NMR for Compound 3g in $\text{DMSO-}d_6$

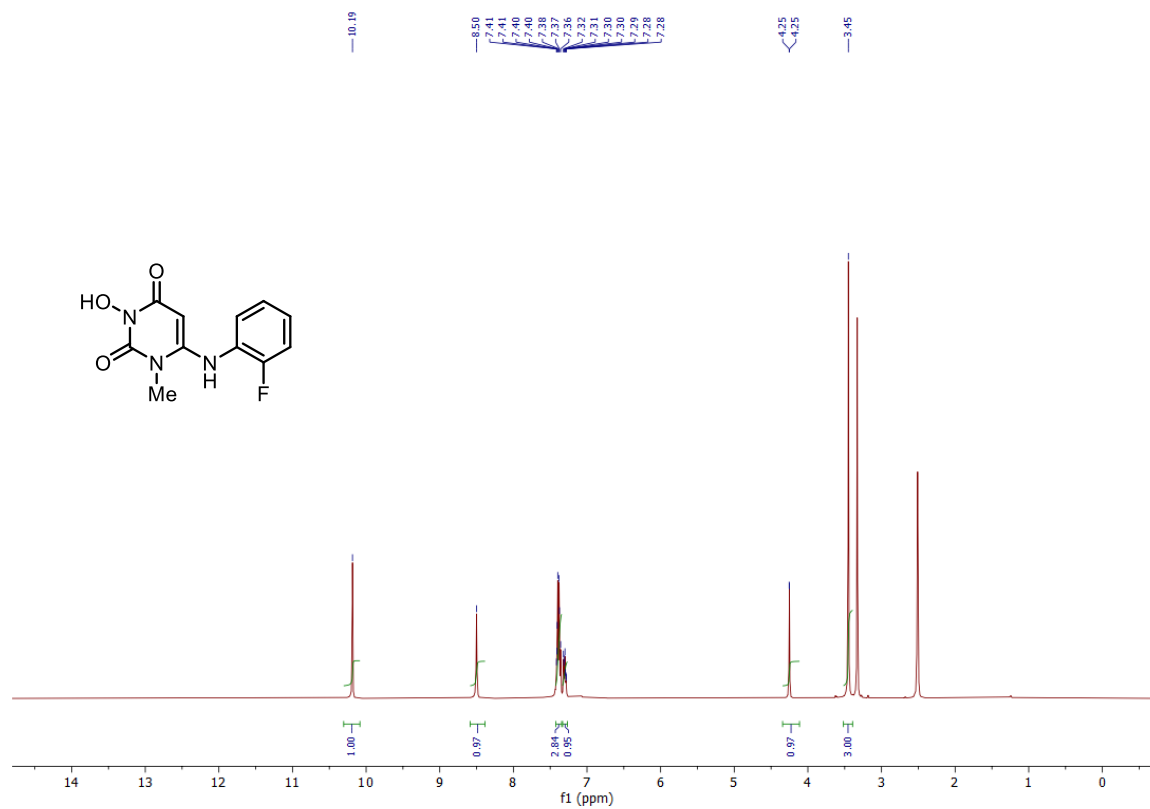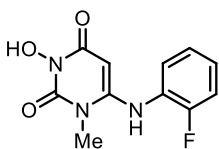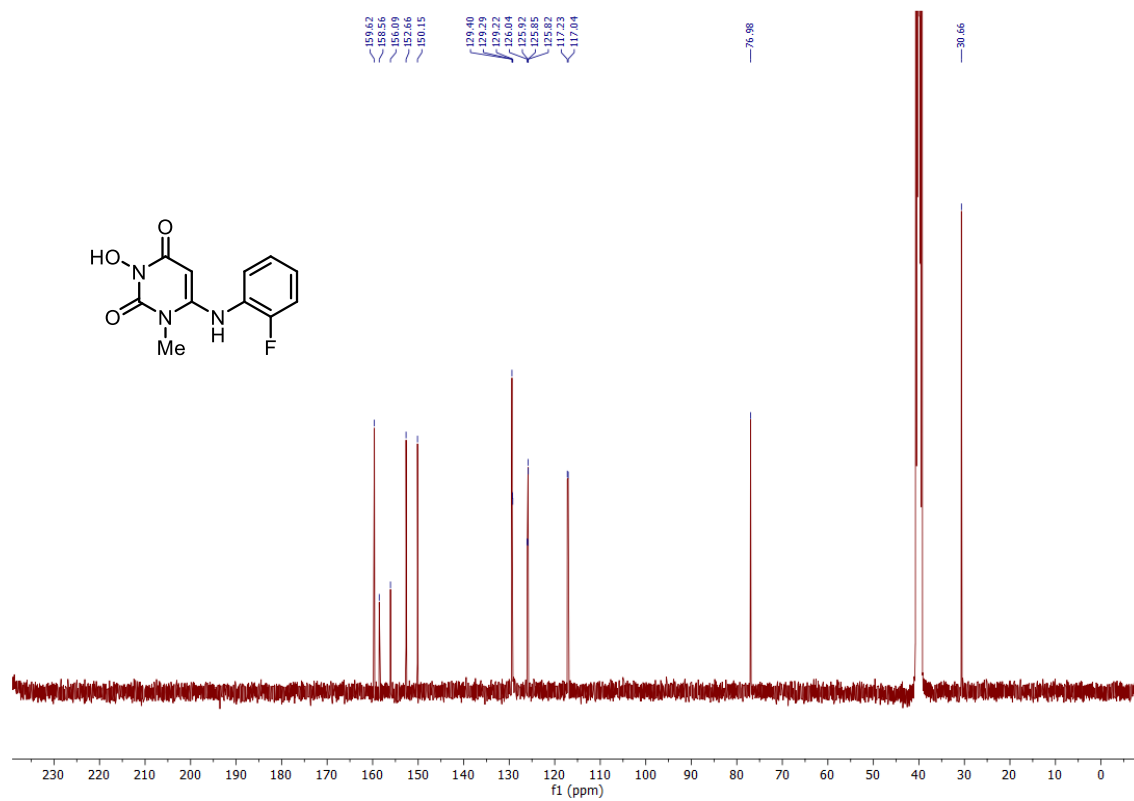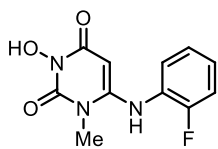

# HRMS for Compound 3g

|                    |                    |                               |         |                        |                                        |
|--------------------|--------------------|-------------------------------|---------|------------------------|----------------------------------------|
| <b>Sample Name</b> | MS-04-39 depro     | <b>Position</b>               | P2-C9   | <b>Instrument Name</b> | TOF Walk Up                            |
| <b>User Name</b>   | Syafiq             | <b>Inj Vol</b>                | 1       | <b>InjPosition</b>     |                                        |
| <b>Sample Type</b> | Sample             | <b>IRM Calibration Status</b> | Success | <b>Data Filename</b>   | MMI_ESI_Positive_MS-04-39 depro_7214.d |
| <b>ACQ Method</b>  | MMI_ESI_Positive.m | <b>Comment</b>                |         | <b>Acquired Time</b>   | 8/22/2025 9:34:21 AM (UTC-05:00)       |

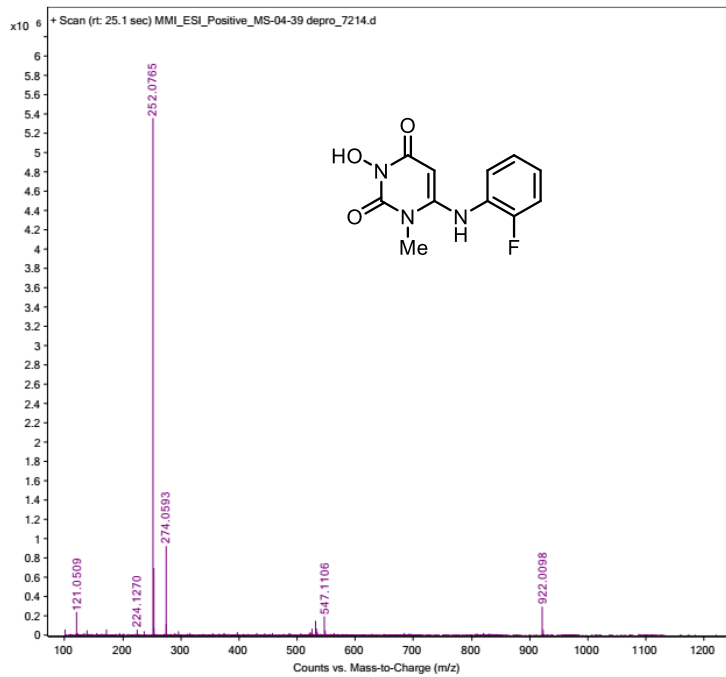

# $^1\text{H}$ NMR and $^{13}\text{C}$ NMR for Compound 3h in $\text{DMSO-}d_6$

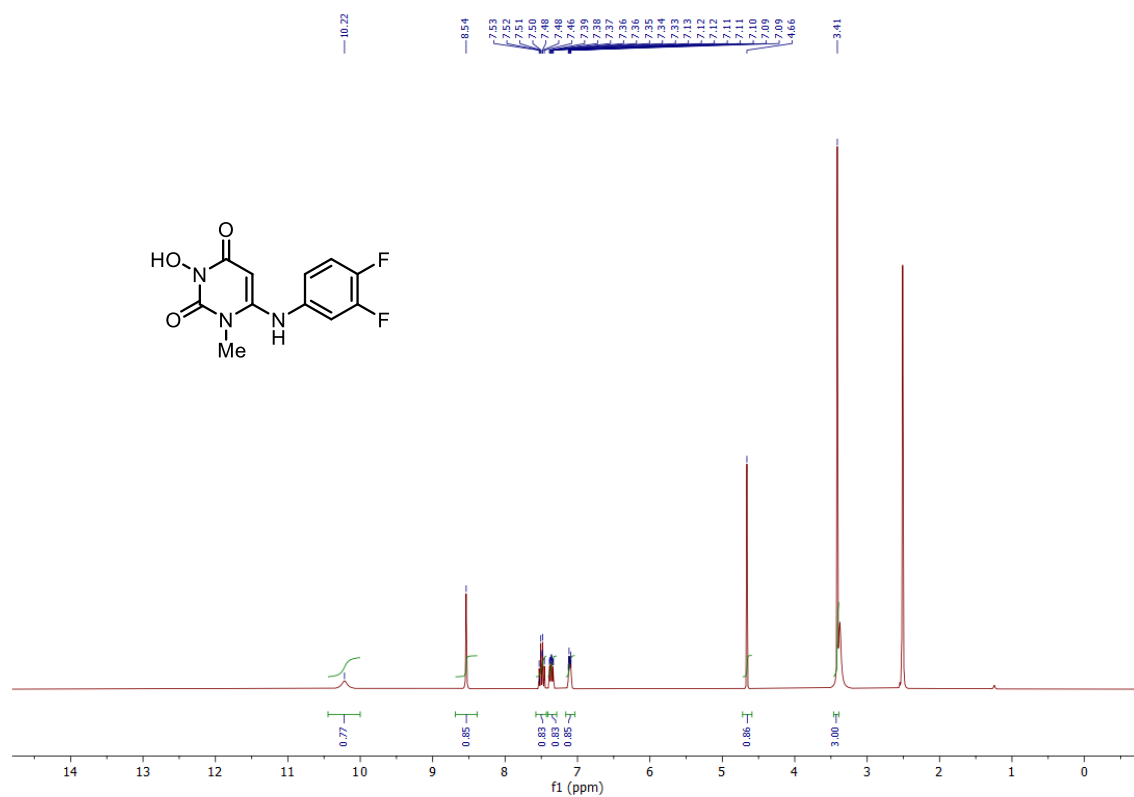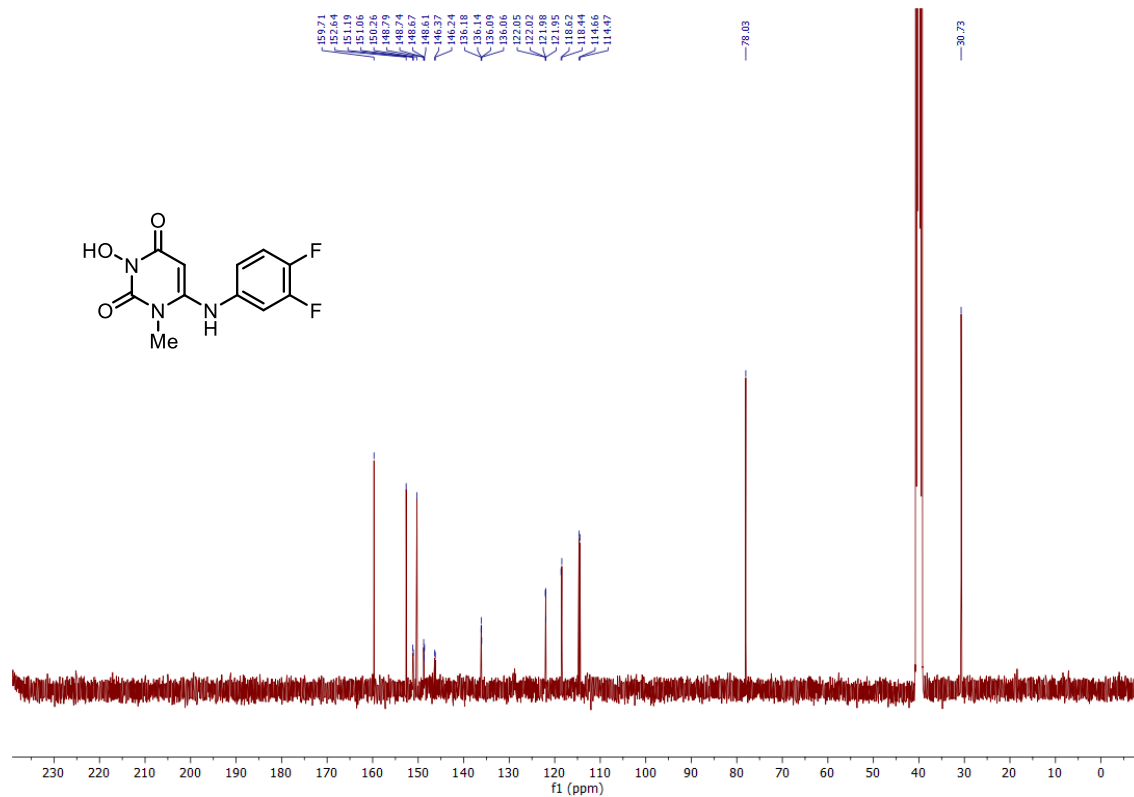

# HRMS and HPLC Trace for Compound 3h

**Sample Name** MS-04-45 depro      **Position** P2-C10      **Instrument Name** TOF Walk Up  
**User Name** Syafiq      **Inj Vol** 1      **InjPosition**  
**Sample Type** Sample      **IRM Calibration Status** Success      **Data Filename** MMI\_ESI\_Positive\_MS-04-45 depro\_7216.d  
**ACQ Method** MMI\_ESI\_Positive.m      **Comment**      **Acquired Time** 8/22/2025 9:46:10 AM (UTC-05:00)

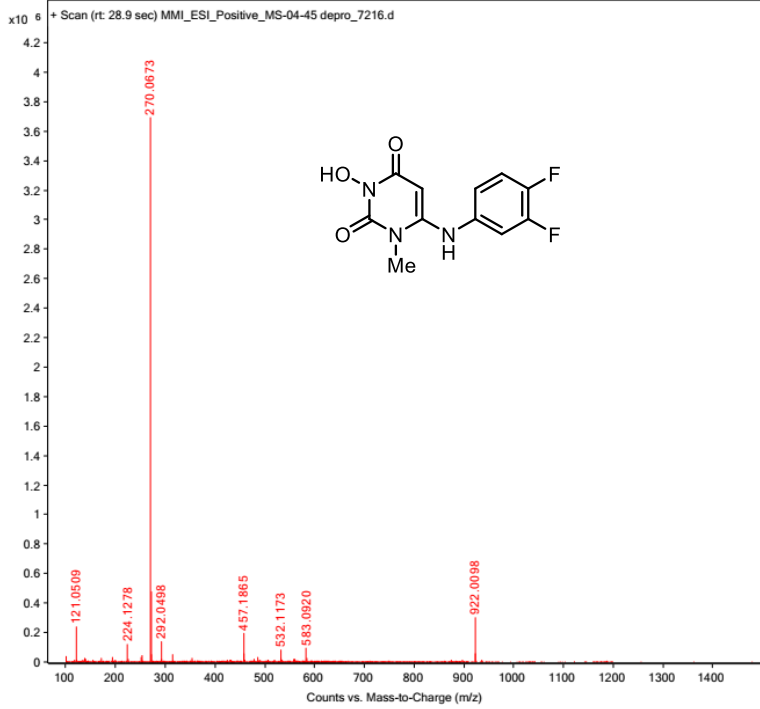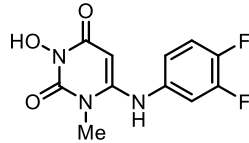

Sample Info : MS-04-45 Depro

Additional Info : Peak(s) manually integrated

\*DAD1 A, Sig=254,4 Ref=off (Syafiq\Washing\_MeOH\_02262024 27MS-04-45 Depro.D) - DAD1 A, Sig=254,4 Ref=off (Syafiq\Washing\_MeOH\_022

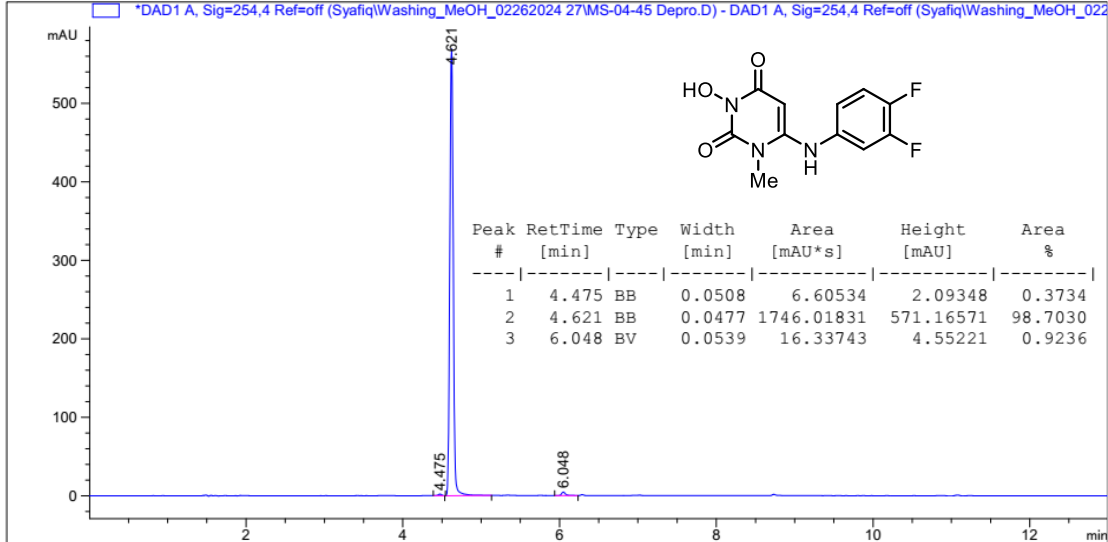

# $^1\text{H}$ NMR and $^{13}\text{C}$ NMR for Compound 3i in $\text{DMSO-}d_6$

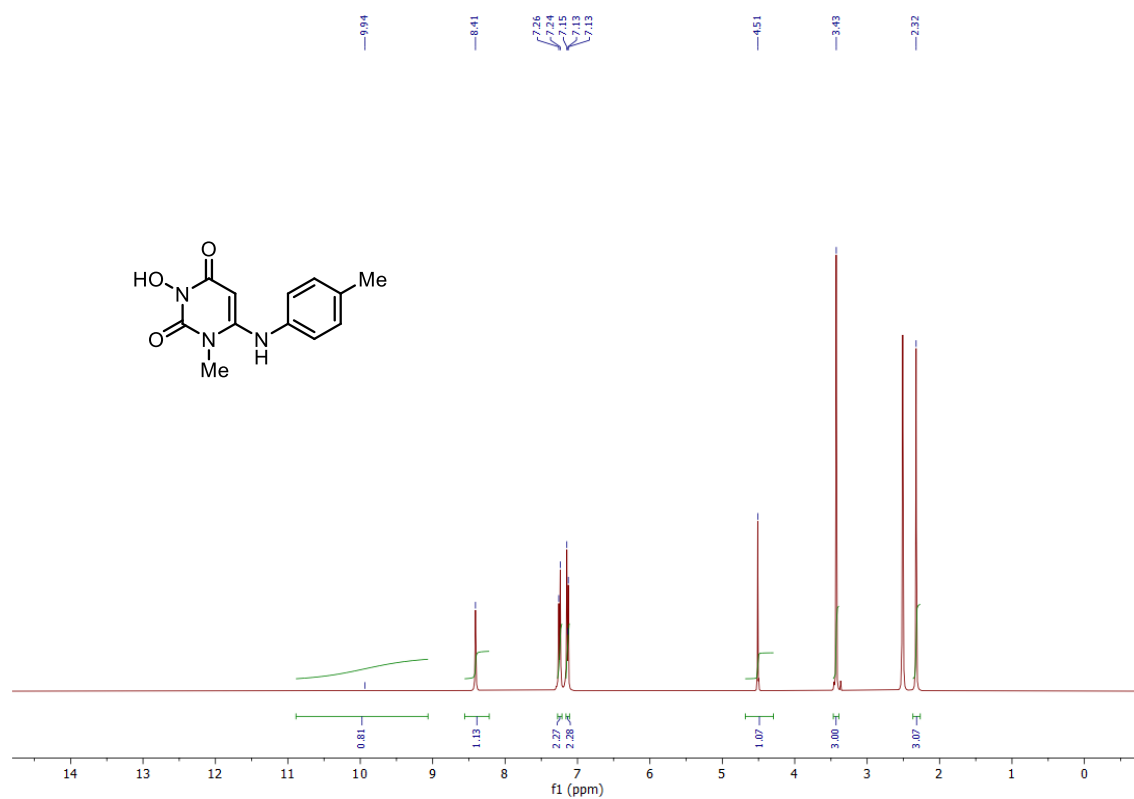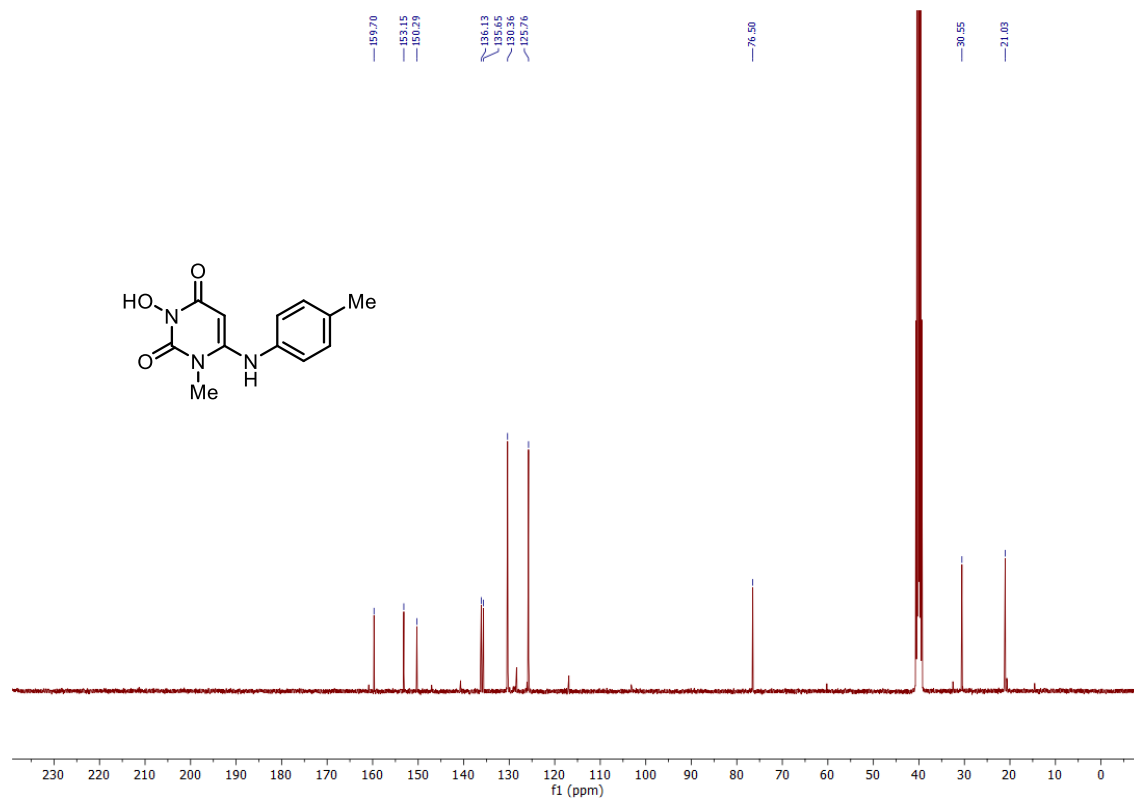

# HRMS for Compound 3i

|             |                    |                        |         |                 |                                         |
|-------------|--------------------|------------------------|---------|-----------------|-----------------------------------------|
| Sample Name | MS-03-233 depro    | Position               | P1-E1   | Instrument Name | TOF Walk Up                             |
| User Name   | Syafiq             | Inj Vol                | 1       | InjPosition     |                                         |
| Sample Type | Sample             | IRM Calibration Status | Success | Data Filename   | MMI_ESI_Negative_MS-03-233 depro_1473.d |
| ACQ Method  | MMI_ESI_Negative.m | Comment                |         | Acquired Time   | 3/10/2026 6:04:56 PM (UTC-05:00)        |

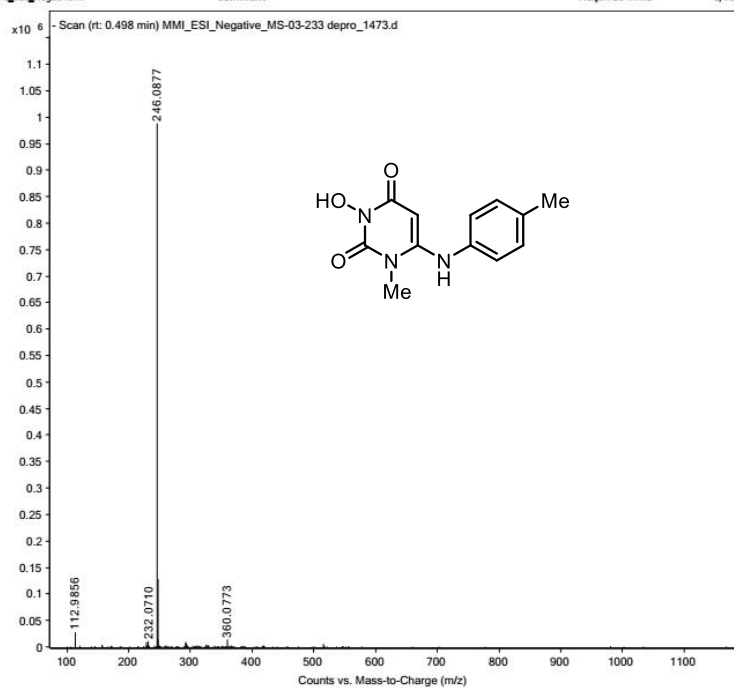

# $^1\text{H}$ NMR and $^{13}\text{C}$ NMR for Compound 3j in $\text{DMSO-}d_6$

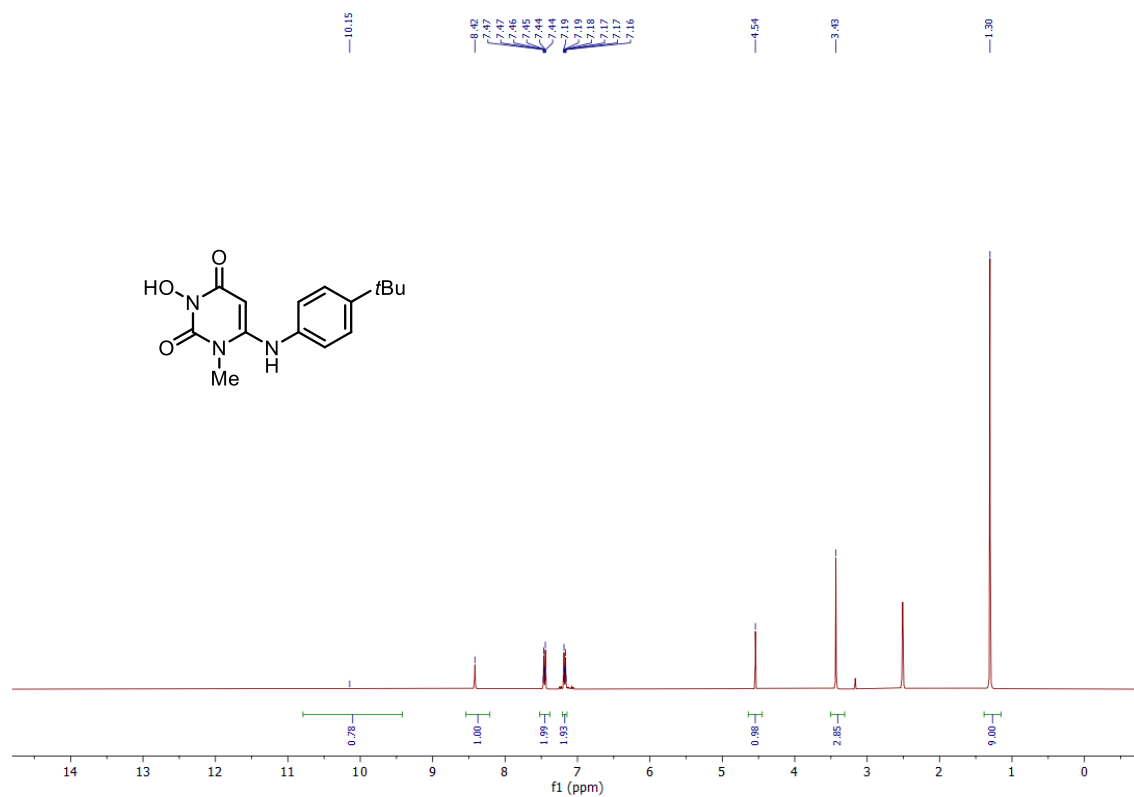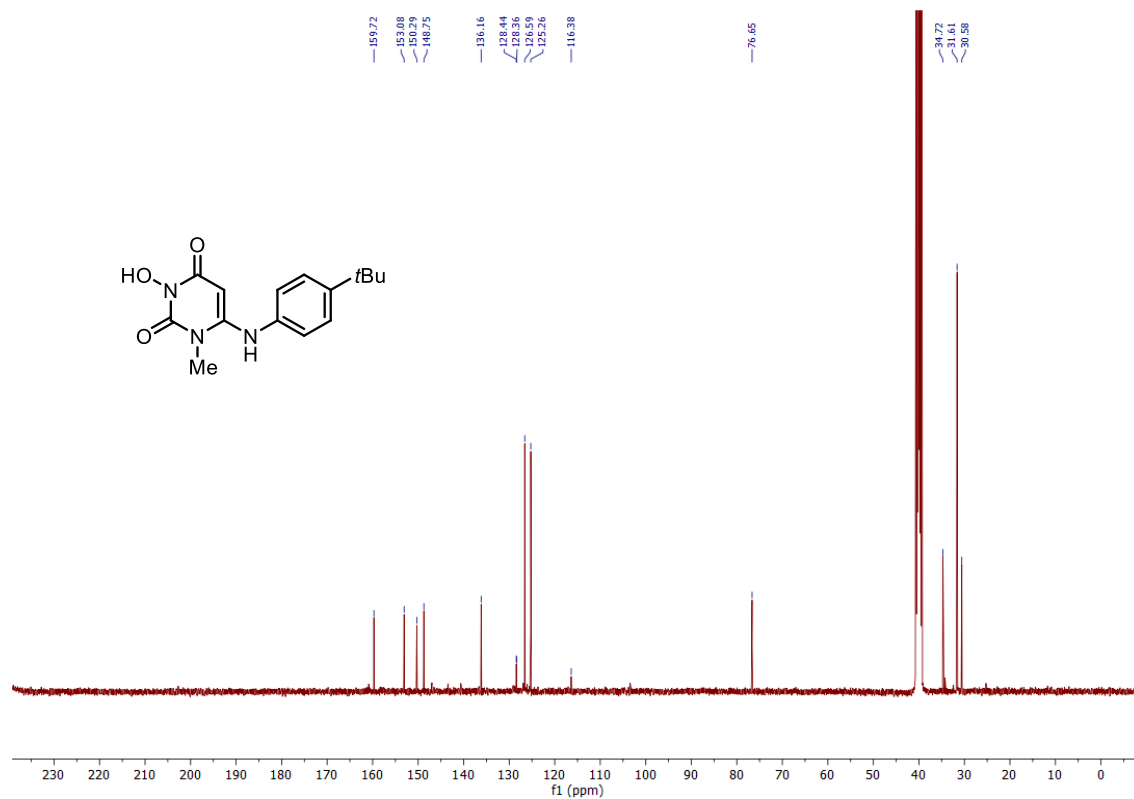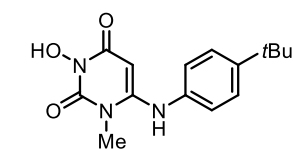

# HRMS for Compound 3j

|             |                    |                        |         |                 |                                        |
|-------------|--------------------|------------------------|---------|-----------------|----------------------------------------|
| Sample Name | MS-04-65 depro     | Position               | P2-C10  | Instrument Name | TOF Walk Up                            |
| User Name   | Syafiq             | Inj Vol                | 1       | InjPosition     |                                        |
| Sample Type | Sample             | IRM Calibration Status | Success | Data Filename   | MMI_ESI_Positive_MS-04-65 depro_7613.d |
| ACQ Method  | MMI_ESI_Positive.m | Comment                |         | Acquired Time   | 9/10/2025 4:13:05 PM (UTC-05:00)       |

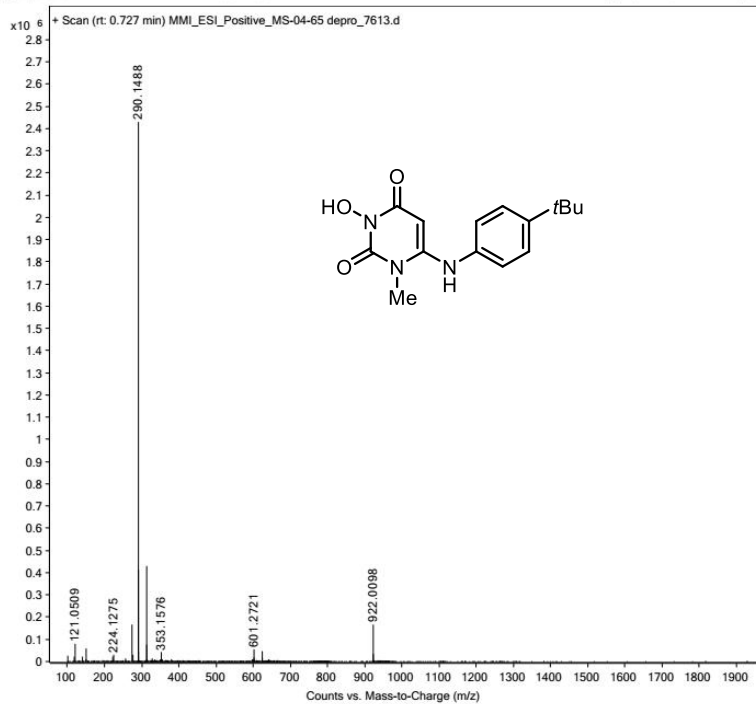

# $^1\text{H}$ NMR and $^{13}\text{C}$ NMR for Compound 3k in $\text{DMSO-}d_6$

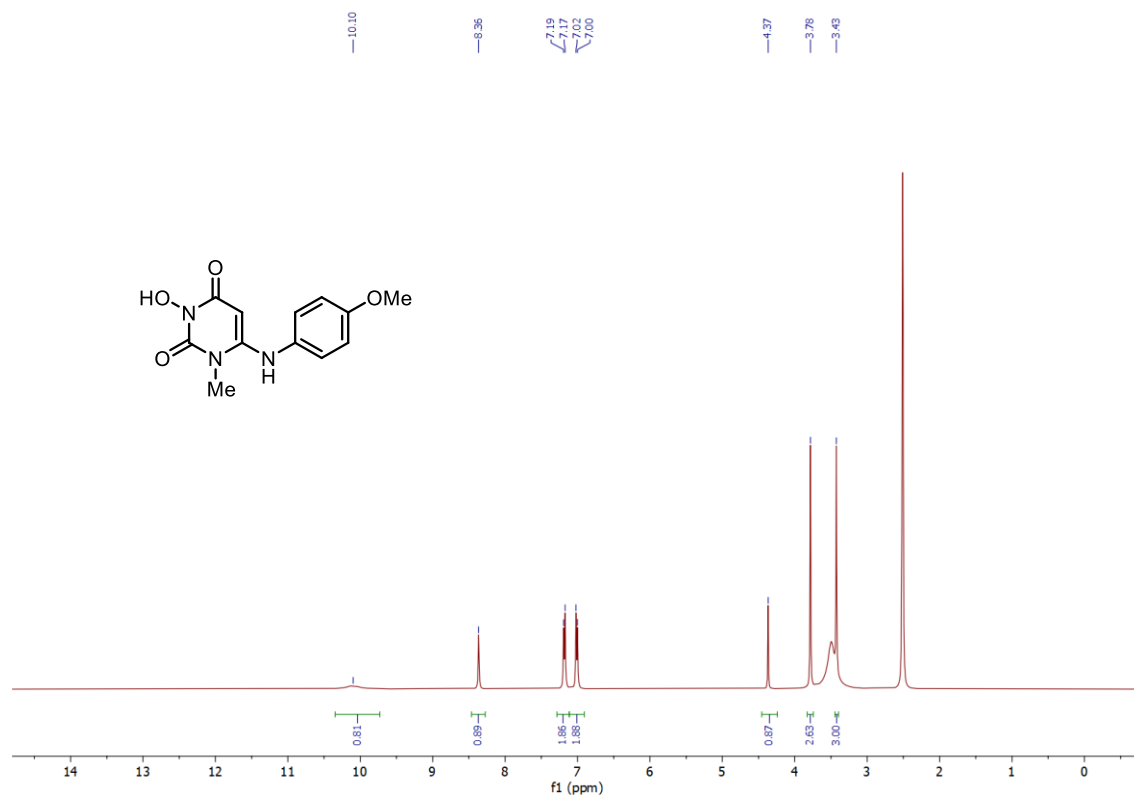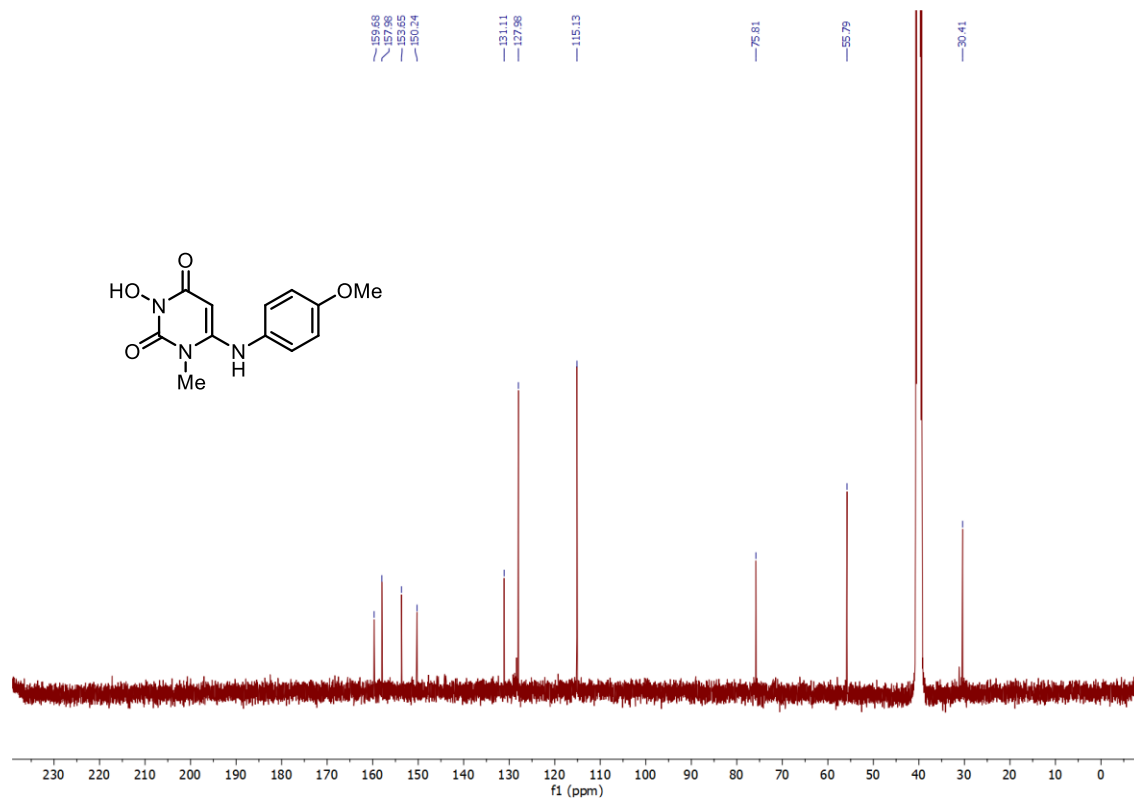

# HRMS and HPLC Trace for Compound 3k

|                    |                    |                               |         |                        |                                        |
|--------------------|--------------------|-------------------------------|---------|------------------------|----------------------------------------|
| <b>Sample Name</b> | MS-04-33 depro     | <b>Position</b>               | P1-D7   | <b>Instrument Name</b> | TOF Walk Up                            |
| <b>User Name</b>   | Syafiq             | <b>Inj Vol</b>                | 1       | <b>Inj Position</b>    |                                        |
| <b>Sample Type</b> | Sample             | <b>IRM Calibration Status</b> | Success | <b>Data Filename</b>   | MMI_ESI_Negative_MS-04-33 depro_2241.d |
| <b>ACQ Method</b>  | MMI_ESI_Negative.m | <b>Comment</b>                |         | <b>Acquired Time</b>   | 3/30/2026 9:01:04 AM (UTC-05:00)       |

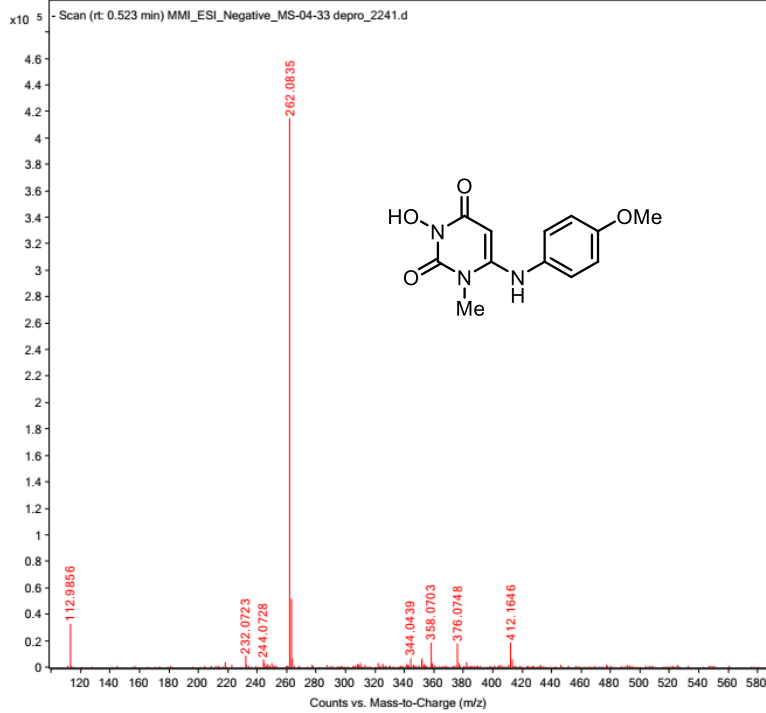

Sample Info : MS-04-33 Depro

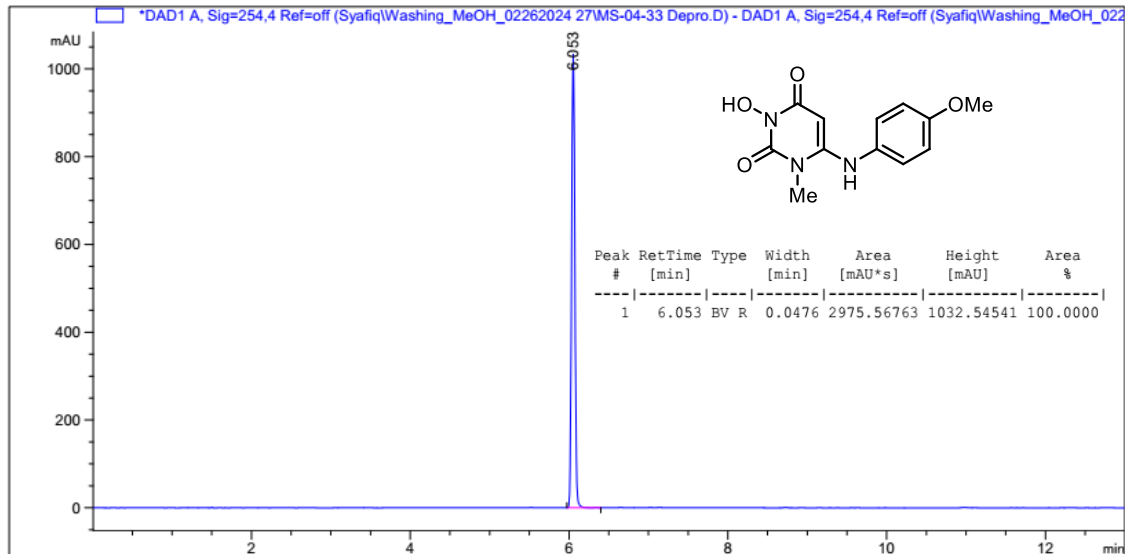

# $^1\text{H}$ NMR and $^{13}\text{C}$ NMR for Compound 3l in $\text{DMSO-}d_6$

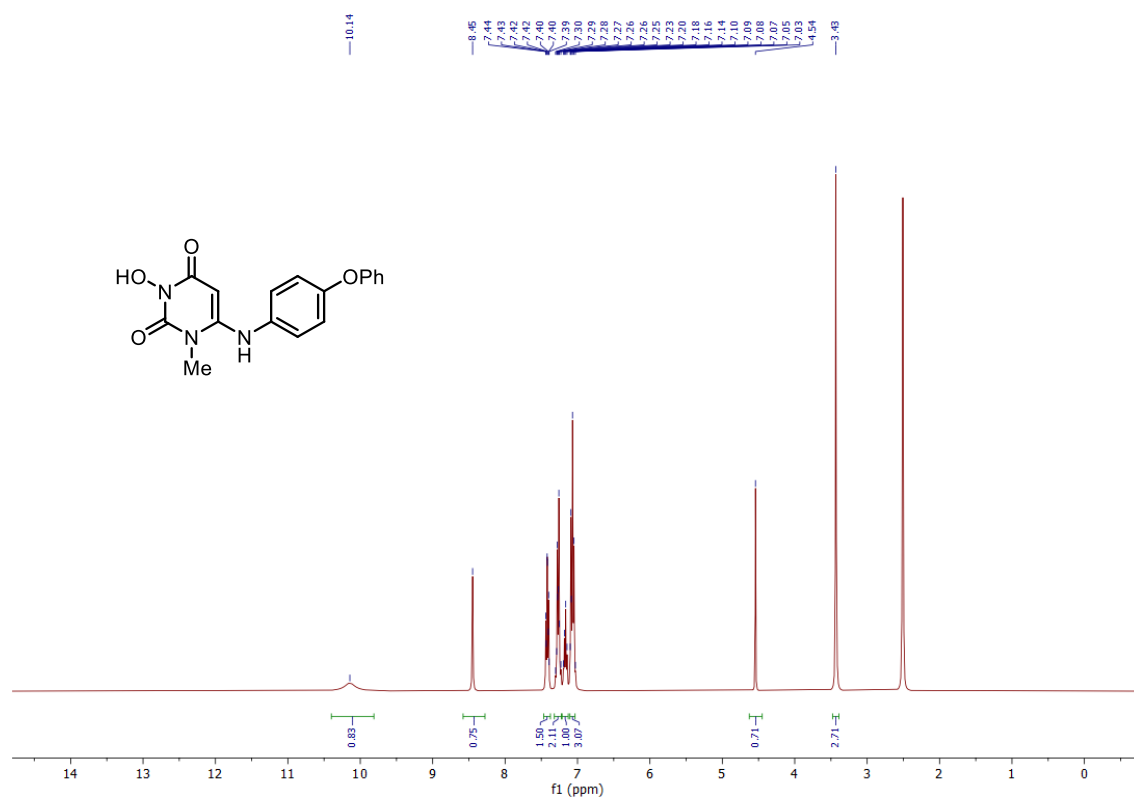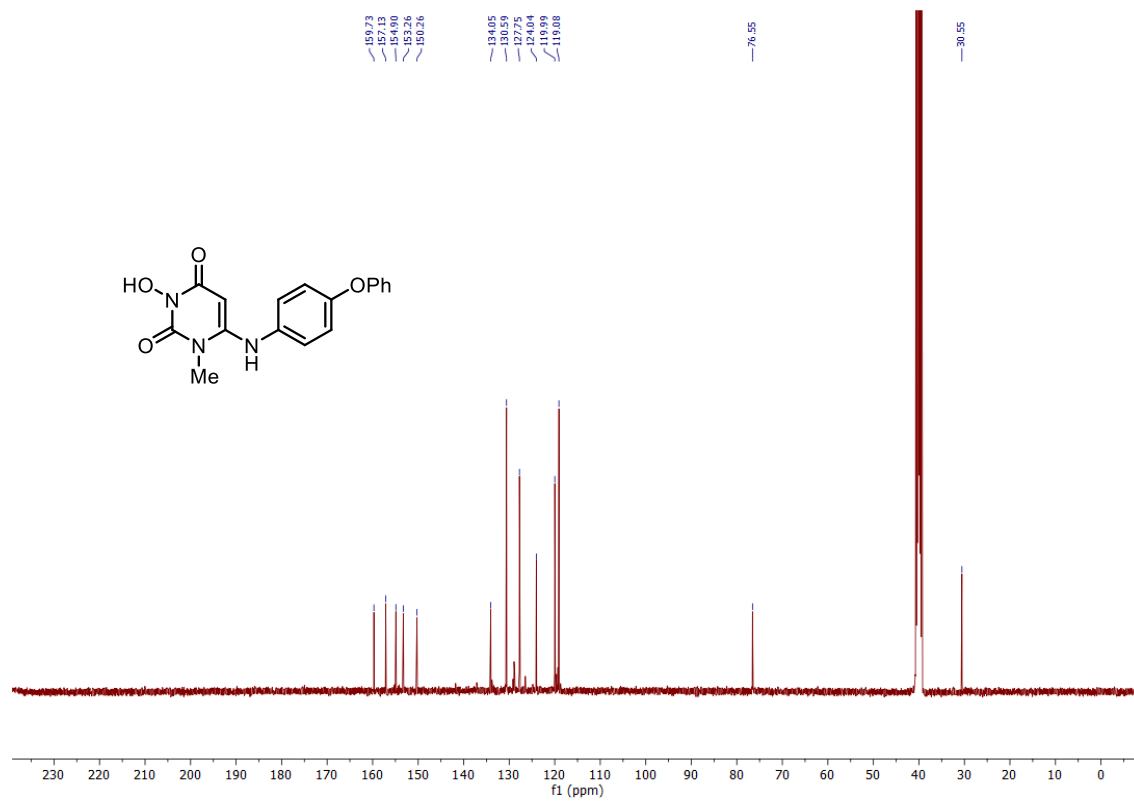

# HRMS for Compound 3l

|             |                    |                        |         |                 |                                    |
|-------------|--------------------|------------------------|---------|-----------------|------------------------------------|
| Sample Name | MS-04-93fp         | Position               | P2-D8   | Instrument Name | TOF Walk Up                        |
| User Name   | Syafiq             | Inj Vol                | 1       | InjPosition     |                                    |
| Sample Type | Sample             | IRM Calibration Status | Success | Data Filename   | MMI_ESI_Positive_MS-04-93fp_0500.d |
| ACQ Method  | MMI_ESI_Positive.m | Comment                |         | Acquired Time   | 12/10/2025 5:56:52 PM (UTC-06:00)  |

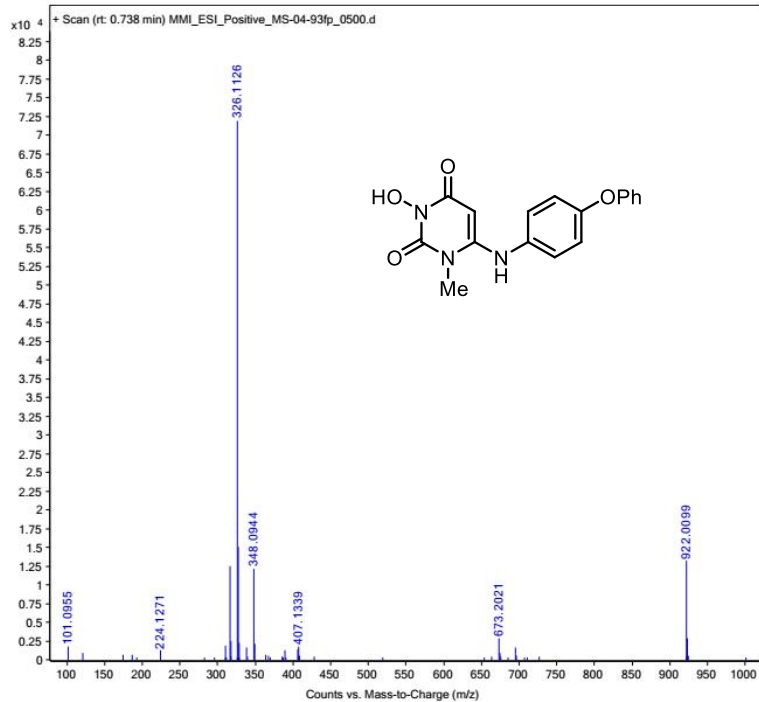

# $^1\text{H}$ NMR and $^{13}\text{C}$ NMR for Compound 3m in $\text{DMSO-}d_6$

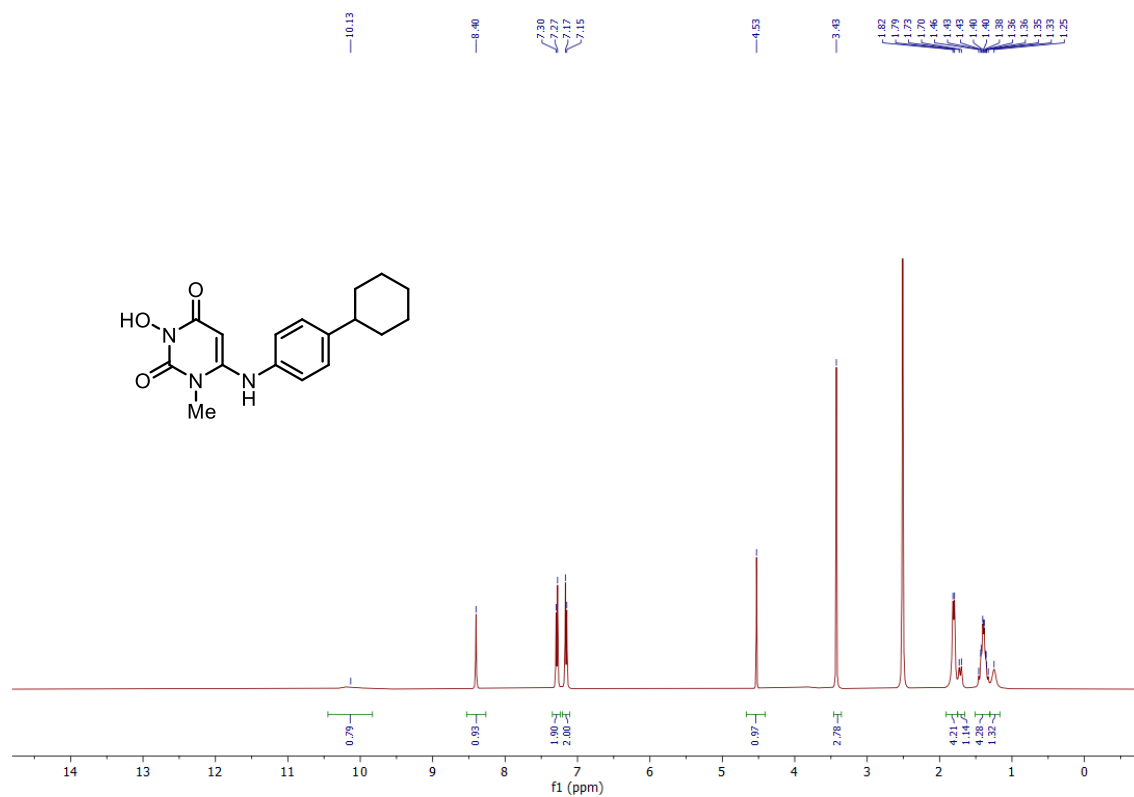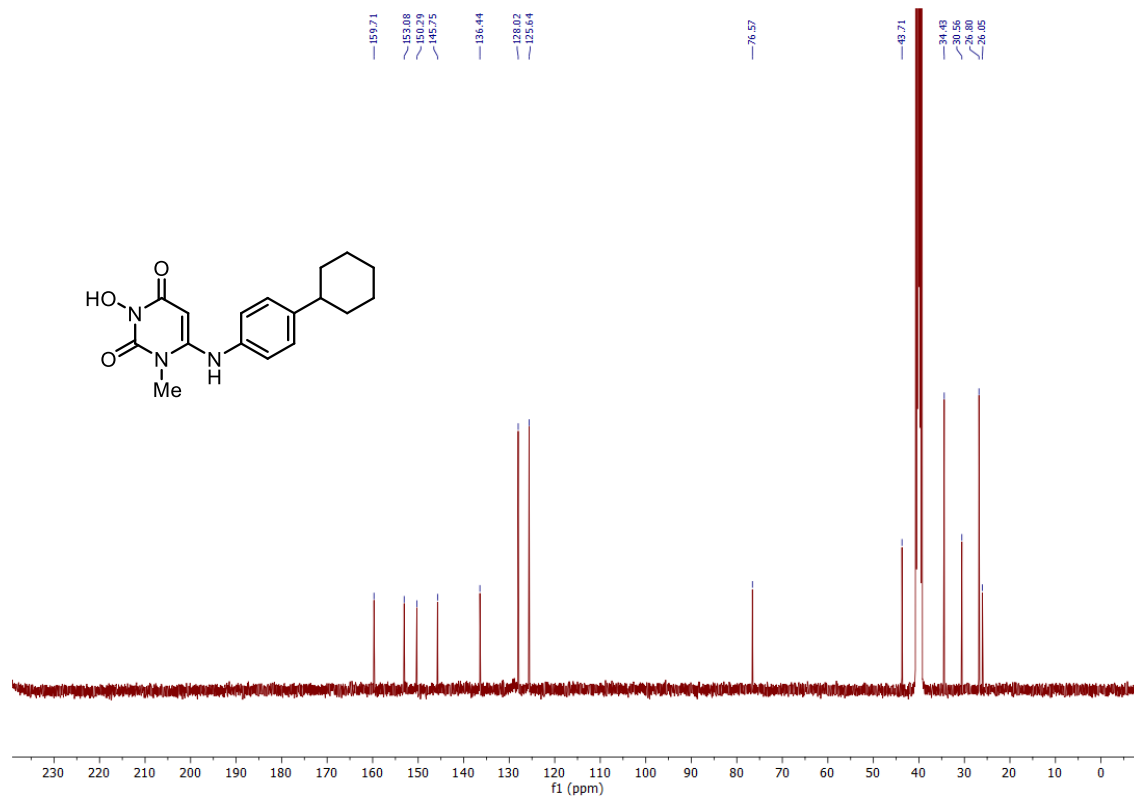

# HRMS for Compound 3m

|             |                    |                        |         |                 |                                   |
|-------------|--------------------|------------------------|---------|-----------------|-----------------------------------|
| Sample Name | MS-04-89p          | Position               | P2-D7   | Instrument Name | TOF Walk Up                       |
| User Name   | Syafiq             | Inj Vol                | 1       | InjPosition     |                                   |
| Sample Type | Sample             | IRM Calibration Status | Success | Data Filename   | MMI_ESI_Positive_MS-04-89p_0498.d |
| ACQ Method  | MMI_ESI_Positive.m | Comment                |         | Acquired Time   | 12/10/2025 5:45:04 PM (UTC-06:00) |

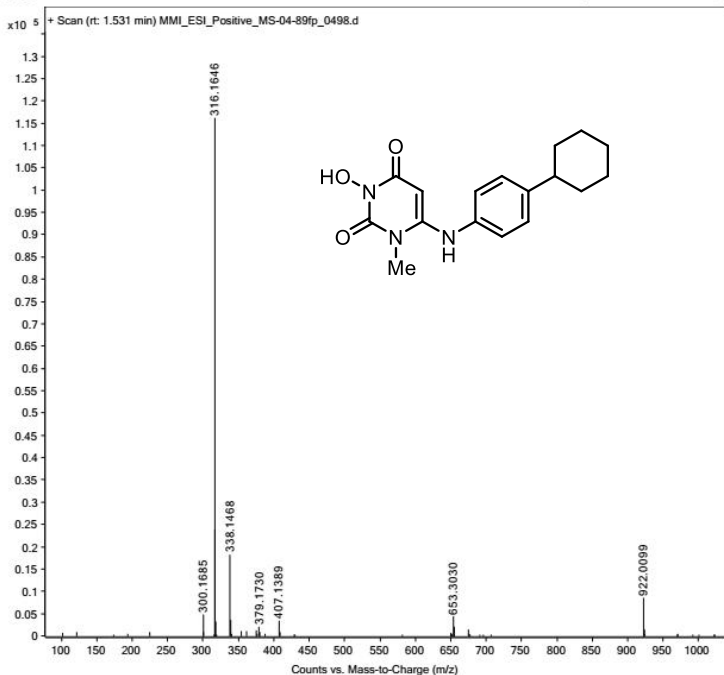

# $^1\text{H}$ NMR and $^{13}\text{C}$ NMR for Compound 3n in $\text{DMSO-}d_6$

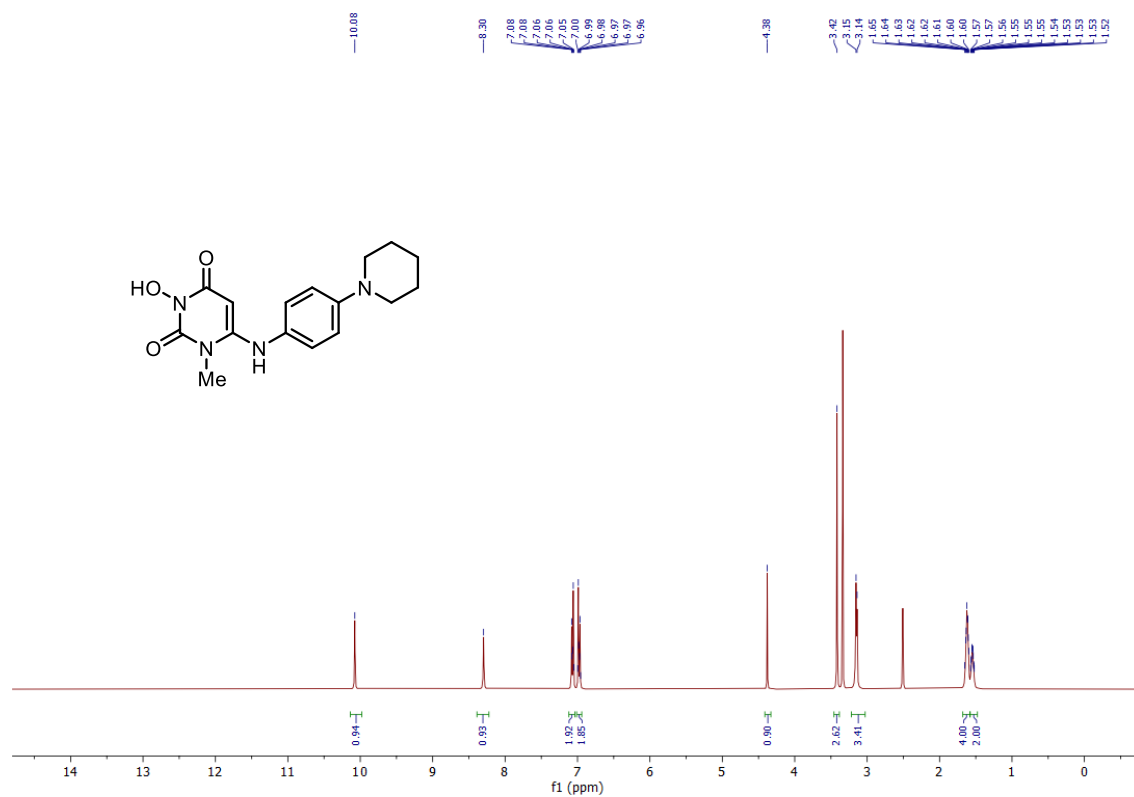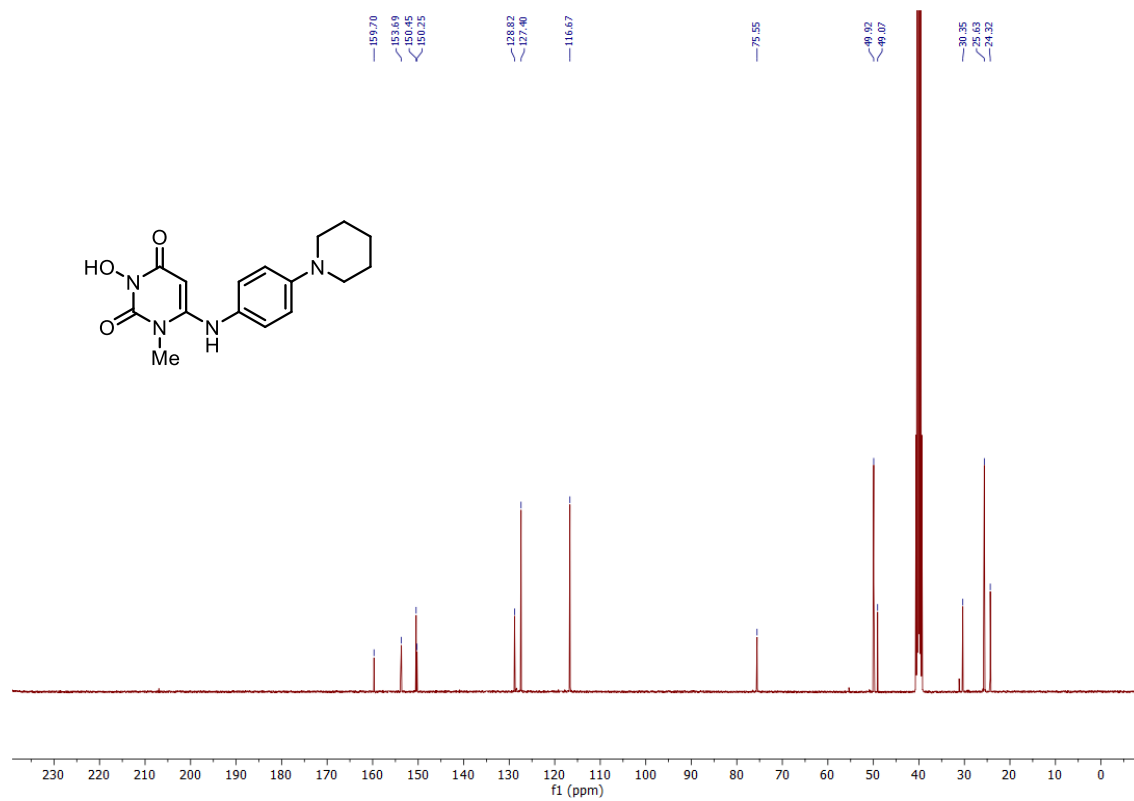

# HRMS for Compound 3n

|             |                    |                        |         |                 |                                          |
|-------------|--------------------|------------------------|---------|-----------------|------------------------------------------|
| Sample Name | MS-04-87 depro-29  | Position               | P1-F6   | Instrument Name | TOF Walk Up                              |
| User Name   | Syafiq             | Inj Vol                | 1       | InjPosition     |                                          |
| Sample Type | Sample             | IRM Calibration Status | Success | Data Filename   | MMI_ESI_Positive_MS-04-87 depro-29_2431. |
| ACQ Method  | MMI_ESI_Positive.m | Comment                |         | Acquired Time   | 4/2/2026 4:22:32 PM (UTC-05:00)          |

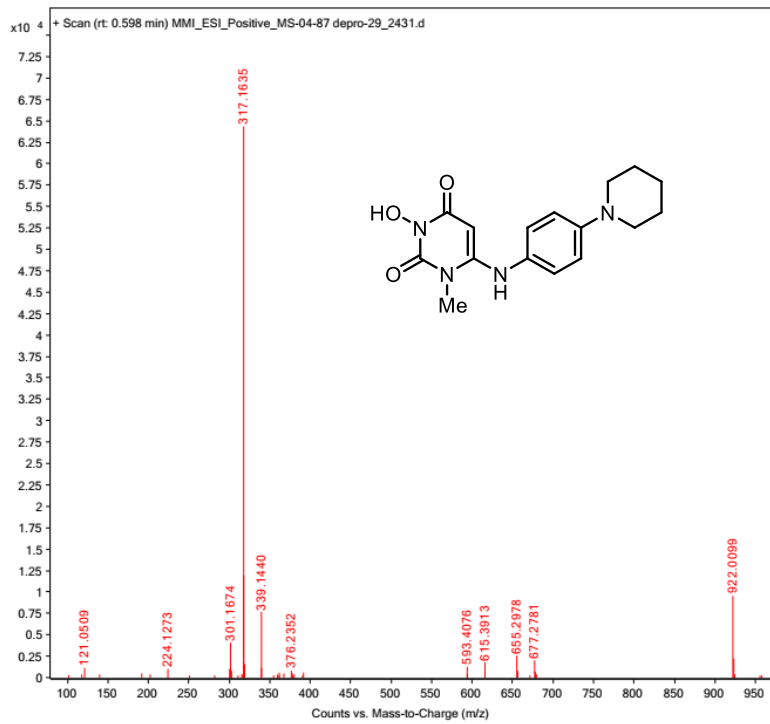

## Measurement of 6-FAM fluorophore quenching by compounds

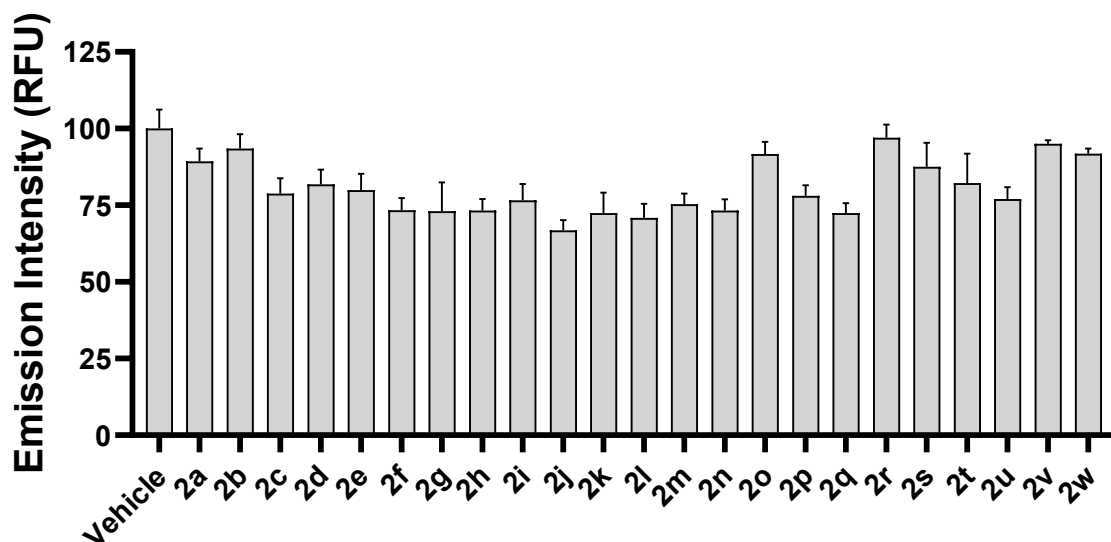

**Figure S1.** 6-FAM emission intensity in the presence of compounds **2a-w**

Compounds (50  $\mu\text{M}$  final concentration) were mixed with the 6-FAM-labeled strand of the DNA substrate (5 nM final) in assay buffer (20 mM Tris pH 8.5, 50 mM NaCl, 10 mM  $\text{MgCl}_2$ , 5% glycerol, 5 mM  $\beta\text{-ME}$ , 0.0025% v/v Tween 20, 0.25% v/v DMSO) and incubated for 30 min at 37  $^\circ\text{C}$  before recording fluorescence intensity. Data are shown as mean  $\pm$  SEM from n=1-2 independent experiments each performed in duplicate.

## Detection of compound aggregation via centrifugation

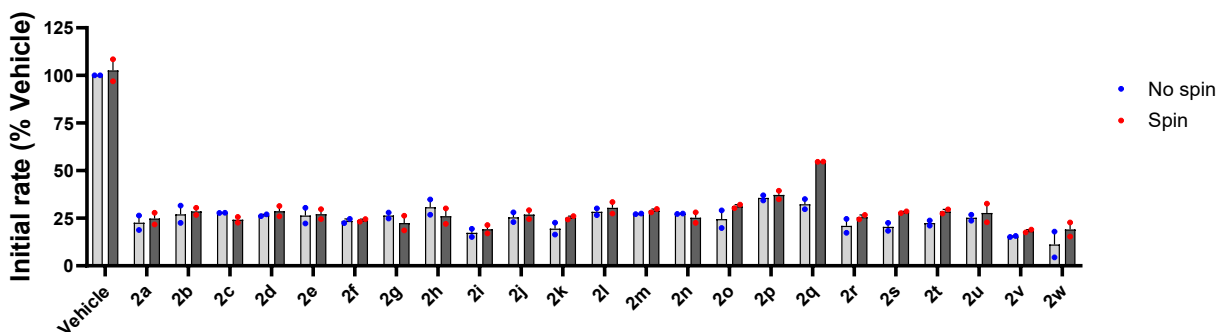

**Figure S2.** Effect of centrifugation on Mpr inhibition by compounds **2a-w**.

Compounds were diluted in assay buffer and split into two aliquots. One aliquot was added directly to the assay plate (“No spin”) and the other aliquot was centrifuged for 20 min at 13,000 g prior to addition to the assay plate (“Spin”). MBP-3C-Mpr (10 nM final concentration) was pre-incubated with compound for 15 min at 37 °C before addition of substrate (5 nM final concentration) to initiate the reactions. The rate of fluorescence increase in the presence of inhibitors was expressed as a percentage of the rate in the presence of DMSO (Vehicle). Data are shown as mean  $\pm$  SEM from n=2 independent experiments performed in duplicate.

## Mpr dose-response curves of compounds 2a-w

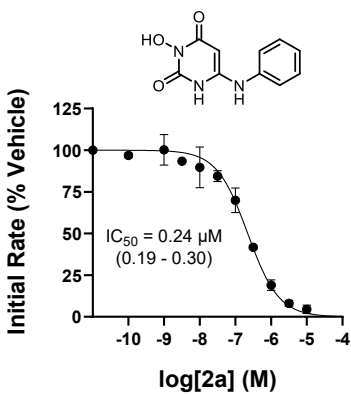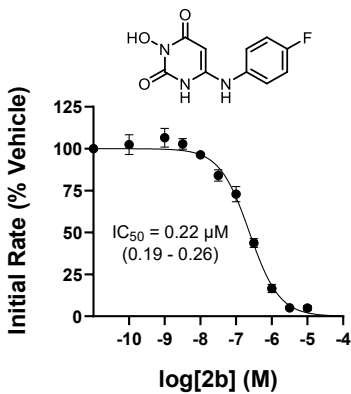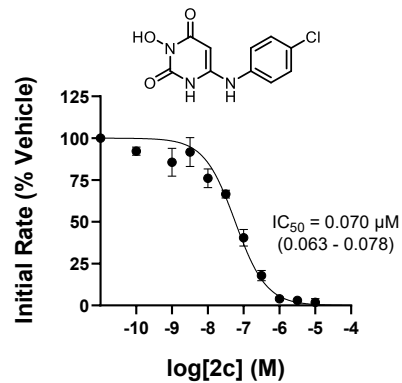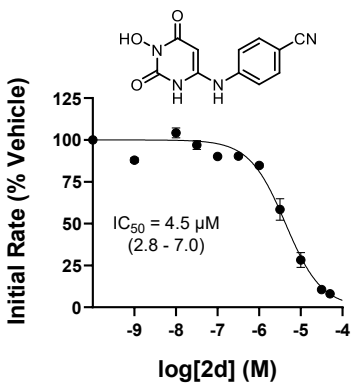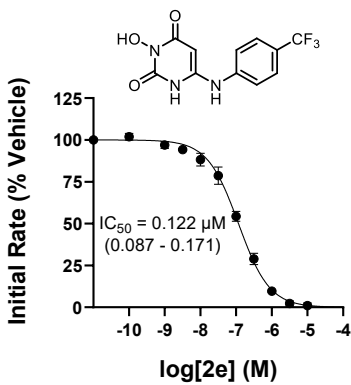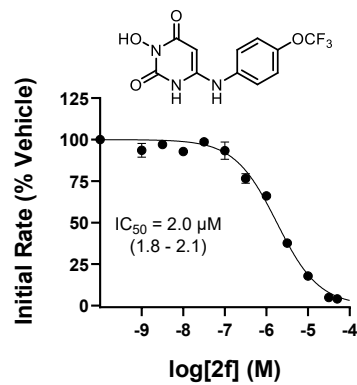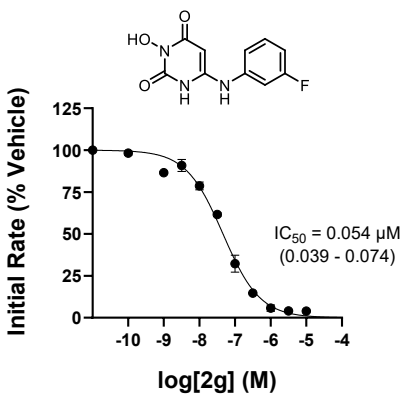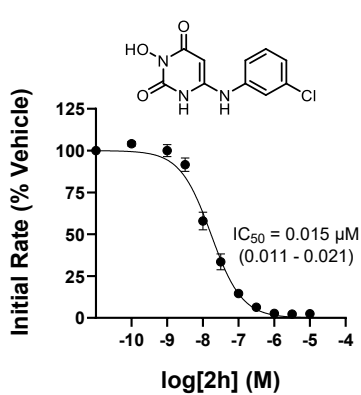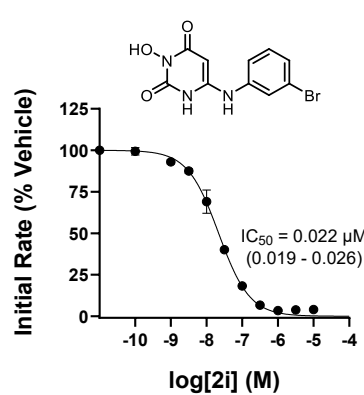

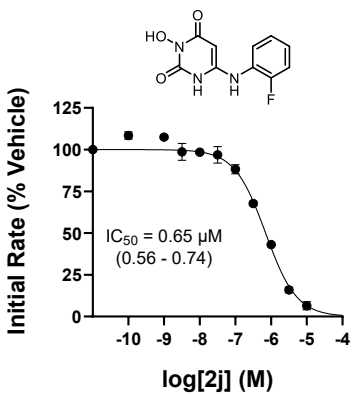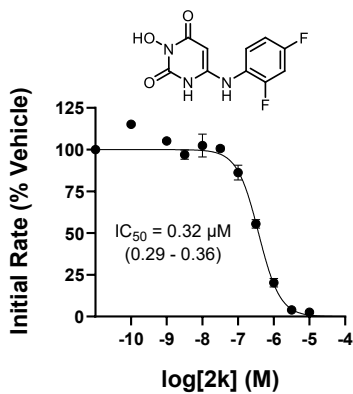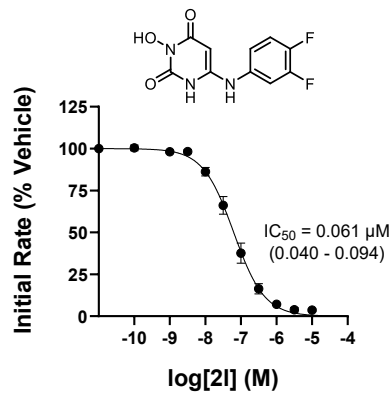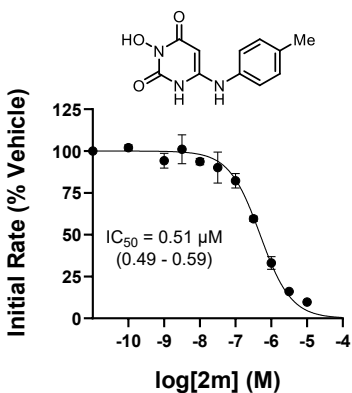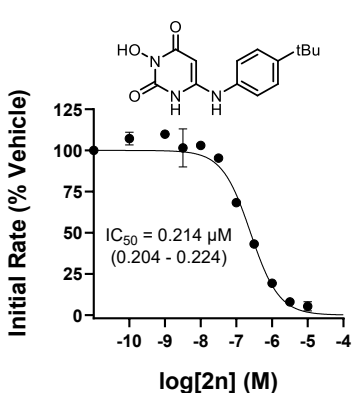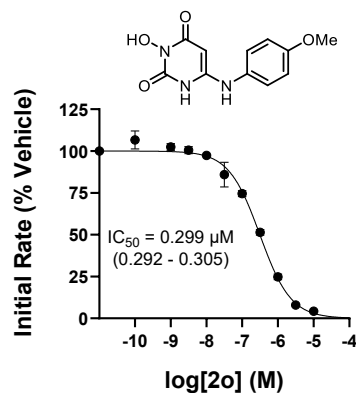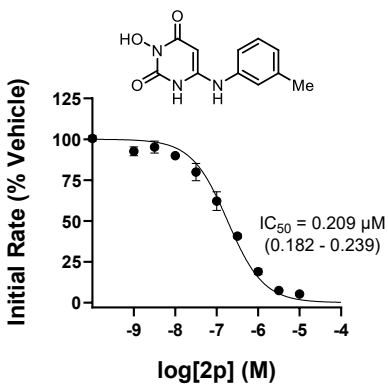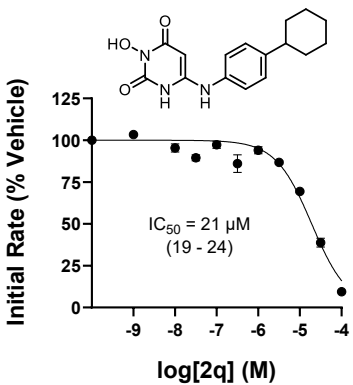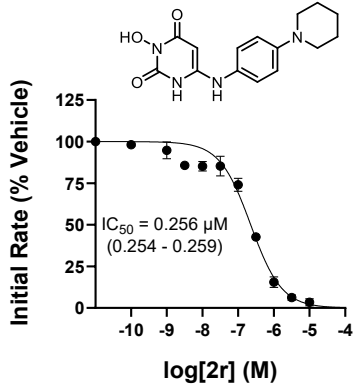

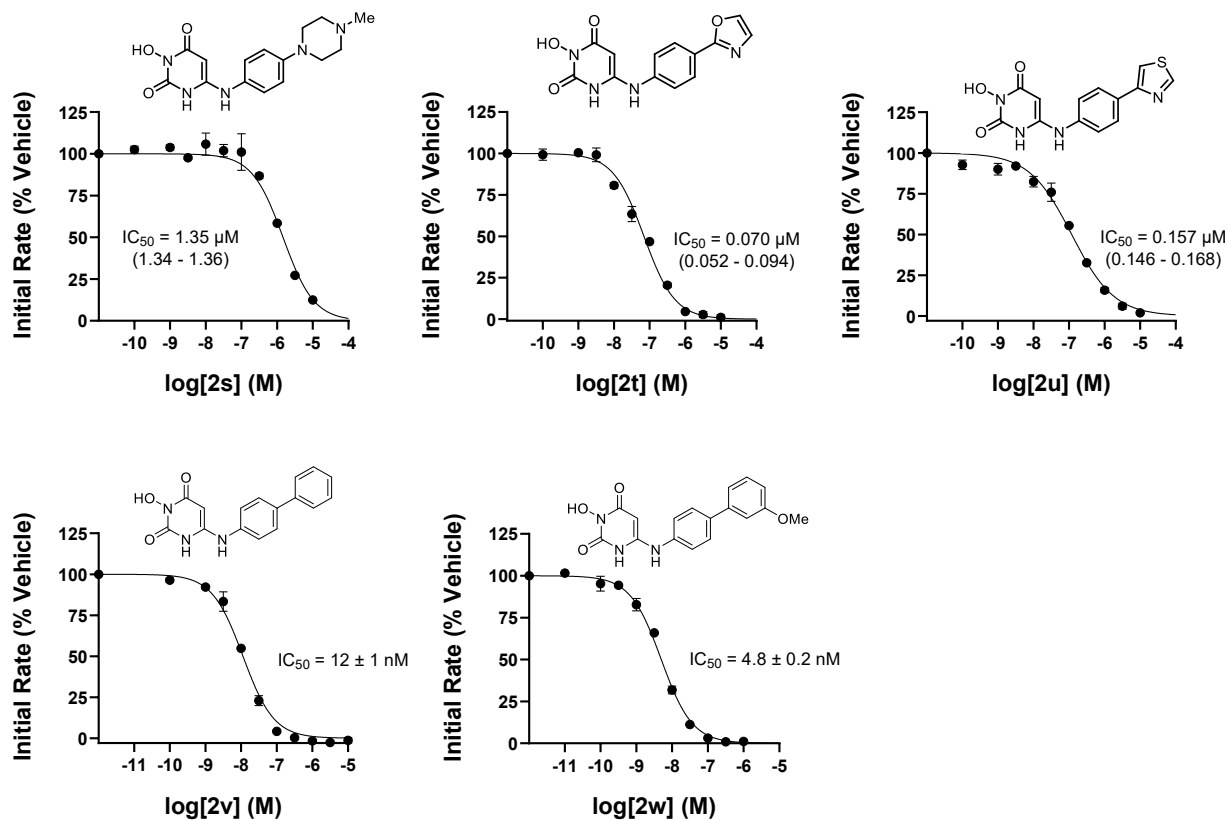

**Figure S3.** Concentration-response analysis of Mpr inhibitors **2a-w**.

Mpr (10 nM final concentration) was pre-incubated with compound for 15 min at 37 °C before addition of substrate (5 nM final concentration) to initiate the reaction. The rate of fluorescence increase was determined from the linear portion of each trace, and rates in the presence of inhibitors were expressed as a percentage of the rate in the presence of DMSO (“Vehicle”). Data are shown as mean ± SEM from two independent experiments, each performed in duplicate.
